# Supplementary material for: Genetic dissection of morphological variation in rosette leaves and leafy heads in cabbage (Brassica oleracea var. capitata).
Source: Research Square preprint supplement (doi:10.21203/rs.3.rs-1615865/v1), 2022-05-23
Supplement: Supplementary file 1 [file 401f2eee1d6f6c1d62d026cf.xlsx]

## Sheet: Suppl. S1
Supplementary Table S1 Cabbage core collection
#	Accession name	Type of population	Cabbage name	Crop type	Usage, maturity, and/or growing season	Field 2017	Field 2018	Field 2019
1	TKI008	F1 hybrid	ALFREDO	White	Summer	X	X	X
2	TKI010	F1 hybrid	AMTRAK	White	Storage	X	X	X
3	TKI011	F1 hybrid	AUTORO	Red	Industry	X	X	X
4	TKI012	F1 hybrid	AZURRO	Red	Early	X	X	X
5	TKI013	F1 hybrid	BARTOLO	White	Storage	X	-	X
6	TKI017	F1 hybrid	BRONCO	White	Summer	X	X	X
7	TKI019	F1 hybrid	BUSCARO	Red	Industry	X	-	X
8	TKI022	F1 hybrid	CARAFLEX	Pointed	Summer	X	-	X
9	TKI026	F1 hybrid	DUNCAN	Pointed	Winter	X	X	X
10	TKI028	F1 hybrid	EXCALIBUR	White	Storage narrow planting	X	X	X
11	TKI029	F1 hybrid	FARAO	White	Early	X	-	X
12	TKI032	F1 hybrid	GAZELLE	White	Early	X	-	X
13	TKI034	F1 hybrid	GUNMA	White	Early	X	-	X
14	TKI035	F1 hybrid	HINOVA	White	Industry	X	-	X
15	TKI036	F1 hybrid	HISPI	Pointed	Winter	X	-	X
16	TKI037	F1 hybrid	HURRICANE	White	Summer	X	-	X
17	TKI038	F1 hybrid	INTEGRO	Red	Early	X	-	X
18	TKI041	F1 hybrid	KLIMARO	Red	Storage	X	-	X
19	TKI045	F1 hybrid	LODERO	Red	Storage	X	X	X
20	TKI050	F1 hybrid	MURDOC	Pointed	Summer	X	X	X
21	TKI055	F1 hybrid	PASSAT	White	Industry	X	X	X
22	TKI056	F1 hybrid	PRIMERO	Red	Early	X	X	X
23	TKI057	F1 hybrid	REACTION	White	Storage narrow planting	X	X	X
24	TKI060	F1 hybrid	RENTON	White	Winter	X	X	X
25	TKI062	F1 hybrid	STANTON	White	Winter	X	-	X
26	TKI064	F1 hybrid	SUBARO	Red	Storage	X	-	X
27	TKI065	F1 hybrid	TRAVERO	Red	Storage narrow planting	X	X	X
28	TKI066	F1 hybrid	TYPHOON	White	Industry	X	-	X
29	TKI076	F1 hybrid	MEGATON	White	Industry	X	-	X
30	TKI116	F1 hybrid	SINTEX	White	-	X	-	X
31	TKI135	F1 hybrid	ANCOMA	White	Late	X	X	-
32	TKI143	F1 hybrid	JETMA	White	Early	X	X	X
33	TKI146	F1 hybrid	LEMMA	White	Early	X	-	X
34	TKI148	F1 hybrid	MADLENE	Savoy	Mid	X	-	-
35	TKI149	F1 hybrid	MORAMA	Savoy	Late	X	-	X
36	TKI151	F1 hybrid	MUCSUMA	Red	-	X	X	X
37	TKI153	F1 hybrid	NAOMA	Red	-	X	-	X
38	TKI154	F1 hybrid	OKLAHOMA	NA	Late	X	X	X
39	TKI157	F1 hybrid	ORIEMA	White	Mid	X	-	X
40	TKI158	F1 hybrid	PANDION	NA	Early	X	X	X
41	TKI160	F1 hybrid	RAYMA	White	Early	X	X	-
42	TKI161	F1 hybrid	RED DYNASTY	Red	Mid	X	X	-
43	TKI162	F1 hybrid	REDMA	Red	Mid	-	-	X
44	TKI164	F1 hybrid	RESIMA	Red	Storage	X	X	-
45	TKI165	F1 hybrid	REXOMA	Red	Late	X	X	X
46	TKI166	F1 hybrid	RODIMA	Red	Storage	X	X	-
47	TKI168	F1 hybrid	SECOMA	White	Industry	X	X	-
48	TKI171	F1 hybrid	SONSMA	Pointed	Early	X	X	X
49	TKI173	F1 hybrid	STOREMA	White	Storage	X	-	X
50	TKI174	F1 hybrid	SUFAMA	White	Industry	X	X	X
51	TKI175	F1 hybrid	SWEETY	White	Mid	X	X	X
52	TKI177	F1 hybrid	TACOMA	White	Mid	X	X	-
53	TKI178	F1 hybrid	TOURIMA	NA	Early	X	-	X
54	TKI185	F1 hybrid	ZULEIMA	White	Industry	X	-	X
55	TKI195	F1 hybrid	BISHILV (BC63)	NA	Summer	X	-	X
56	TKI208	F1 hybrid	ERDENO	White	Industry	-	-	X
57	TKI210	F1 hybrid	GEMAL	White	Fresh	X	-	X
58	TKI212	F1 hybrid	GREGORIAN	NA	Fresh	X	-	-
59	TKI213	F1 hybrid	ICEPRINCE	Savoy	-	X	X	-
60	TKI214	F1 hybrid	KEVIN	White	Fresh	X	X	X
61	TKI215	F1 hybrid	KLABISHI	White	Flat, Winter	X	X	X
62	TKI224	F1 hybrid	NEBRASKA	Savoy	-	X	-	X
63	TKI225	F1 hybrid	NOVATOR	White	Storage	-	-	X
64	TKI228	F1 hybrid	PRUKTOR	White	Fresh	X	X	X
65	TKI229	F1 hybrid	RAISSA	Red	-	-	-	X
66	TKI231	F1 hybrid	RAMCO	White	Industry	X	X	-
67	TKI232	F1 hybrid	REBECCA	Red	-	X	X	X
68	TKI233	F1 hybrid	RESCUE	Red	Storage	X	-	X
69	TKI236	F1 hybrid	SOCRATES	White	Storage	X	-	X
70	TKI242	F1 hybrid	ZENON	White	Storage	X	X	X
71	TKI261	F1 hybrid	AKIMAKIGOKUWASE NO.2	White	Fresh	X	X	X
72	TKI262	F1 hybrid	ASASHIO	White	Fresh	X	X	X
73	TKI263	F1 hybrid	AYAHIKARI	White	Fresh	X	X	X
74	TKI264	F1 hybrid	AYAMINE	White	Fresh	X	X	X
75	TKI265	F1 hybrid	AYANE	White	Fresh	X	-	X
76	TKI266	F1 hybrid	CHEERS	White	Fresh	X	-	X
77	TKI267	F1 hybrid	FAST CASH	NA	Fresh	X	-	X
78	TKI268	F1 hybrid	GAKUYOU	White	Fresh	X	-	X
79	TKI270	F1 hybrid	HARUHIKARI NO.7	White	Fresh	X	X	X
80	TKI271	F1 hybrid	HARUNAMI	White	Fresh	X	X	X
81	TKI272	F1 hybrid	HATSUKOI	White	Fresh	X	-	X
82	TKI273	F1 hybrid	HOSHIMISAKI	White	Fresh	X	-	X
83	TKI274	F1 hybrid	NO.1175	White	Fresh	X	-	X
84	TKI275	F1 hybrid	NO.1293	White	Fresh	X	-	X
85	TKI276	F1 hybrid	OKINA	White	Fresh	X	-	X
86	TKI277	F1 hybrid	OS CROSS	NA	Fresh	X	-	X
87	TKI278	F1 hybrid	RUBY KING	Red	-	X	X	X
88	TKI279	F1 hybrid	RUBY PERFECTION	Red	-	X	-	X
89	TKI280	F1 hybrid	SAVOY ACE	Savoy	-	X	-	X
90	TKI281	F1 hybrid	SHIOMISAKI	White	Fresh	X	-	X
91	TKI282	F1 hybrid	SUZUNE	White	Fresh	X	-	X
92	TKI283	F1 hybrid	T-523	White	Fresh	X	-	X
93	TKI284	F1 hybrid	T-612	White	Fresh	X	-	X
94	TKI285	F1 hybrid	T-681	White	Fresh	X	-	X
95	TKI286	F1 hybrid	TCA-432	White	Fresh	X	-	X
96	TKI287	F1 hybrid	TCA-448	White	Fresh	X	X	X
97	TKI288	F1 hybrid	TCA-485	White	Fresh	X	-	X
98	TKI289	F1 hybrid	TCA-489	NA	Fresh	X	-	X
99	TKI290	F1 hybrid	TCA-497	NA	Fresh	X	-	X
100	TKI291	F1 hybrid	TERUMISAKI	White	Fresh	X	-	X
101	TKI292	F1 hybrid	YR-SEISHUN	NA	Fresh	X	X	X
102	TKI293	F1 hybrid	YR-TENKU	White	Fresh	X	X	X
103	TKI294	F1 hybrid	KOIMISAKI	White	Fresh	X	-	X
104	TKI295	F1 hybrid	HAMAMISAKI	White	-	X	X	X
105	TKI296	F1 hybrid	SEIRIN	White	Fresh	X	-	X
106	TKI339	F1 hybrid	BOURBON	White	Early Med to C	X	-	X
107	TKI354	F1 hybrid	DELIGHT BALL	NA	Autumn (Ball)	X	-	X
108	TKI357	F1 hybrid	FRONTIER	NA	Mid Round Med.	X	-	X
109	TKI359	F1 hybrid	FUYUMI	White	Winter	X	-	X
110	TKI374	F1 hybrid	MOZART	White	Mid Med to C	X	X	X
111	TKI376	F1 hybrid	NANAKUSA	Savoy	Winter	X	X	X
112	TKI378	F1 hybrid	NIZ13-418	Red	Storage and processing	X	-	X
113	TKI379	F1 hybrid	NIZ17-1197	White	Mid Round Med.	X	X	X
114	TKI380	F1 hybrid	NIZ17-1237	White	Storage & Fresh continental small	X	X	-
115	TKI381	F1 hybrid	NIZ17-1395	White	Mid Flat Med.	X	X	X
116	TKI382	F1 hybrid	NIZ17-1402	White	Mid Round Med.	X	X	X
117	TKI383	F1 hybrid	NIZ17-1439	White	Early Med.	X	X	-
118	TKI384	F1 hybrid	NIZ17-850	White	Mid Med to C	X	X	X
119	TKI390	F1 hybrid	SEVERINA	NA	Early Med to C	X	X	X
120	TKI393	F1 hybrid	SHINWAKANATSU	White	Spring	X	X	X
121	TKI394	F1 hybrid	SHOGUN	NA	Early Summer and Autumn	X	X	X
122	TKI399	F1 hybrid	YAWARAGI	Savoy	Winter	X	X	X
123	TKI401	F1 hybrid	ZOLTAN	White	Storage & Fresh continental	X	-	X
124	TKI419	Open pollinated	BRA 254	Savoy	-	X	X	X
125	TKI421	Open pollinated	BRA 401	Red	-	X	X	X
126	TKI424	Open pollinated	BRA 723	White	-	-	-	X
127	TKI425	Open pollinated	BRA 775	Red	-	-	-	X
128	TKI426	Open pollinated	BRA 789	Red	-	-	-	X
129	TKI427	Open pollinated	BRA 800	Red	-	-	-	X
130	TKI428	Open pollinated	BRA 804	Red	-	X	X	X
131	TKI429	Open pollinated	BRA 821	Savoy	-	X	X	-
132	TKI430	Open pollinated	BRA 827	Savoy	-	X	X	X
133	TKI431	Open pollinated	BRA 848	Savoy	-	-	-	X
134	TKI432	Open pollinated	BRA 853	Savoy	-	-	-	X
135	TKI433	Open pollinated	BRA 868	Savoy	-	-	-	X
136	TKI435	Open pollinated	BRA 905	Savoy	-	-	-	X
137	TKI438	Open pollinated	HRIGRU 4520	White	-	X	-	-
138	TKI439	Open pollinated	HRIGRU 4622	NA	-	X	X	X
139	TKI525	Open pollinated	HRIGRU 12477	NA	-	X	X	X
140	TKI527	Open pollinated	HRIGRU 12479	White	-	X	-	X
141	TKI529	Open pollinated	HRIGRU 4528	White	-	-	-	X
142	TKI531	Open pollinated	HRIGRU 8357	White	-	X	-	X
143	TKI532	Open pollinated	HRIGRU 11555	White	Loose head	X	-	X
144	TKI535	Open pollinated	HRIGRU 10590	White	Early	-	-	X
145	TKI536	Open pollinated	HRIGRU 2574	White	Fodder cabbage	X	-	X
146	TKI537	Open pollinated	HRIGRU 9978	White	-	X	X	-
147	TKI538	Open pollinated	HRIGRU 9836	White	Hybrid cabbage	X	X	X
148	TKI539	Open pollinated	HRIGRU 7824	White	-	X	-	-
149	TKI540	Open pollinated	HRIGRU 4886	White	-	X	-	-
150	TKI541	Open pollinated	HRIGRU 7826	White	Pickling cabbage	X	-	-
151	TKI542	Open pollinated	HRIGRU 6852	Red	-	X	-	X
152	TKI543	Open pollinated	HRIGRU 7835	Red	-	-	-	X
153	TKI544	Open pollinated	HRIGRU 11615	Savoy	-	X	-	X
154	TKI545	Open pollinated	HRIGRU 2626	Savoy	-	X	-	X
155	TKI546	Open pollinated	HRIGRU 3661	Savoy	-	X	-	X
156	TKI548	Open pollinated	HRIGRU 4773	Savoy	-	X	-	X
157	TKI549	Open pollinated	HRIGRU 8362	Savoy	-	X	X	X
158	TKI550	Open pollinated	HRIGRU 8732	Savoy	-	X	-	X
159	TKI551	Open pollinated	HRIGRU 2700	NA	Spring	X	-	X
160	TKI552	Open pollinated	HRIGRU 4771	White	Summer	X	X	X
161	TKI553	Open pollinated	HRIGRU 5394	White	Summer	X	-	X
162	TKI554	Open pollinated	HRIGRU 5451	NA	Summer	X	X	X
163	TKI555	Open pollinated	HRIGRU 11490	White	-	X	-	X
164	TKI556	Open pollinated	HRIGRU 6566	White	-	X	X	X
165	TKI557	Open pollinated	HRIGRU 6568	White	-	X	X	-
166	TKI558	Open pollinated	HRIGRU 3775	White	Summer	X	-	X
167	TKI635	Open pollinated	CGN07028	White	-	X	X	X
168	TKI636	Open pollinated	CGN07061	White	-	X	X	X
169	TKI637	Open pollinated	CGN07062	White	-	X	-	X
170	TKI638	Open pollinated	CGN07069	Pointed	-	X	X	X
171	TKI639	Open pollinated	CGN07077	Pointed	-	X	X	X
172	TKI640	Open pollinated	CGN07092	Red	-	X	-	X
173	TKI642	Open pollinated	CGN07097	Savoy	-	X	X	X
174	TKI643	Open pollinated	CGN07099	Savoy	-	X	X	X
175	TKI644	Open pollinated	CGN07110	Savoy	-	X	X	X
176	TKI645	Open pollinated	CGN07118	Savoy	-	X	X	X
177	TKI646	Open pollinated	CGN07121	Savoy	-	X	X	X
178	TKI647	Open pollinated	CGN07123	Savoy	-	X	X	X
179	TKI648	Open pollinated	CGN07127	White	-	X	X	X
180	TKI659	Open pollinated	CGN11029	White	-	X	-	X
181	TKI660	Open pollinated	CGN11038	Red	-	X	X	X
182	TKI661	Open pollinated	CGN11040	Red	-	X	X	X
183	TKI662	Open pollinated	CGN11043	Red	-	X	X	X
184	TKI663	Open pollinated	CGN11049	Savoy	-	X	X	X
185	TKI664	Open pollinated	CGN11051	Savoy	-	X	-	X
186	TKI665	Open pollinated	CGN11053	Savoy	-	X	X	X
187	TKI666	Open pollinated	CGN11054	Savoy	-	X	-	X
188	TKI668	Open pollinated	CGN11060	White	-	X	-	-
189	TKI669	Open pollinated	CGN11065	White	-	X	X	X
190	TKI670	Open pollinated	CGN11069	White	-	X	X	X
191	TKI688	Open pollinated	CGN11155	White	-	X	X	X
192	TKI689	Open pollinated	CGN11158	White	-	X	X	X
193	TKI690	Open pollinated	CGN11164	Pointed	-	X	-	X
194	TKI691	Open pollinated	CGN11165	Red	-	X	X	X
195	TKI700	Open pollinated	CGN14050	Pointed	-	X	X	X
196	TKI701	Open pollinated	CGN14051	Savoy	-	X	-	X
197	TKI702	Open pollinated	CGN14053	White	-	X	-	X
198	TKI703	Open pollinated	CGN14054	White	-	X	X	X
199	TKI705	Open pollinated	CGN14063	Red	-	X	X	X
200	TKI706	Open pollinated	CGN14064	Red	-	X	X	X
201	TKI713	Open pollinated	CGN14080	White	-	X	X	X
202	TKI714	Open pollinated	CGN14082	Savoy	-	X	X	X
203	TKI718	Open pollinated	CGN14091	White	-	X	X	X
204	TKI724	Open pollinated	CGN15122	White	-	X	-	X
205	TKI735	Open pollinated	CGN15152	White	-	X	X	X
206	TKI736	Open pollinated	CGN15156	White	-	X	X	X
207	TKI739	Open pollinated	CGN15224	White	-	X	-	X
208	TKI740	Open pollinated	CGN15225	White	-	X	X	X
209	TKI741	Open pollinated	CGN15226	White	-	X	X	X
210	TKI742	Open pollinated	CGN15227	White	-	X	X	X
211	TKI743	Open pollinated	CGN15228	White	-	X	X	X
212	TKI744	Open pollinated	CGN15229	White	-	X	X	X
213	TKI745	Open pollinated	CGN15230	White	-	X	X	X
214	TKI746	Open pollinated	CGN15769	Red	-	X	X	X
215	TKI750	Open pollinated	CGN15778	White	-	X	X	X
216	TKI753	Open pollinated	CGN17245	White	-	X	X	X
217	TKI754	Open pollinated	CGN17246	White	-	X	X	X
218	TKI755	Open pollinated	CGN17247	White	-	X	X	X
219	TKI756	Open pollinated	CGN17248	White	-	X	X	X
220	TKI757	Open pollinated	CGN17249	White	-	X	X	X
221	TKI758	Open pollinated	CGN17250	White	-	X	X	X
222	TKI759	Open pollinated	CGN17251	White	-	X	-	X
223	TKI760	Open pollinated	CGN17252	White	-	X	X	X
224	TKI761	Open pollinated	CGN17253	White	-	X	X	X
225	TKI762	Open pollinated	CGN17254	White	-	X	X	X
226	TKI763	Open pollinated	CGN17255	White	-	X	X	X
227	TKI764	Open pollinated	CGN17256	White	-	X	-	X
228	TKI765	Open pollinated	CGN17257	White	-	X	X	X
229	TKI769	Open pollinated	CGN17277	White	-	X	X	X
230	TKI774	Open pollinated	CGN18431	White	-	X	X	X
231	TKI775	Open pollinated	CGN18432	White	-	X	X	X
232	TKI776	Open pollinated	CGN18434	Red	-	X	X	X
233	TKI777	Open pollinated	CGN18435	Red	-	X	X	X
234	TKI778	Open pollinated	CGN18436	Red	-	X	X	X
235	TKI779	Open pollinated	CGN18437	Red	-	X	-	X
236	TKI780	Open pollinated	CGN18438	Red	-	X	X	X
237	TKI790	Open pollinated	CGN18449	Savoy	-	X	-	X
238	TKI791	Open pollinated	CGN18450	Savoy	-	X	X	X
239	TKI793	Open pollinated	CGN18452	Savoy	-	X	X	X
240	TKI794	Open pollinated	CGN18453	Savoy	-	-	-	X
241	TKI795	Open pollinated	CGN18454	Savoy	-	X	X	X
242	TKI796	Open pollinated	CGN18455	Savoy	-	X	X	X
243	TKI797	Open pollinated	CGN18456	Savoy	-	X	X	X
244	TKI806	Open pollinated	CGN18465	White	-	X	X	X
245	TKI816	Open pollinated	CGN20189	White	-	X	X	X
246	TKI820	Open pollinated	CGN20194	White	-	X	X	X
247	TKI823	Open pollinated	PL174868	White	-	X	X	-
248	TKI835	Open pollinated	NGB5007	White	-	X	X	X
249	TKI837	Open pollinated	NGB6040	Savoy	-	X	X	-
250	TKI877	Open pollinated	BRA 871	Savoy	-	X	X	X
251	TKI908	Open pollinated	PI 357379	White	-	X	X	-
252	TKI909	Open pollinated	PI 358284	NA	-	X	X	-
253	TKI910	Open pollinated	PI 357385	White	-	X	X	-
254	TKI911	Open pollinated	PI 212971	NA	-	X	X	X
255	TKI912	Open pollinated	PI 211718	White	-	X	X	-
256	TKI914	Open pollinated	PI 173854	White	-	X	-	-
257	TKI916	Open pollinated	PI 357395	White	-	X	X	-
258	TKI919	Open pollinated	PI 357404	White	-	X	X	-
259	TKI921	Open pollinated	PI 206942	NA	-	X	-	X
260	TKI922	Open pollinated	PI 212080	NA	-	X	-	-
261	TKI925	Open pollinated	PI 357375	White	-	X	X	-
262	TKI926	Open pollinated	PI 357384	White	-	X	X	-
263	TKI928	Open pollinated	PI 662641	NA	-	X	X	-
264	TKI929	Open pollinated	PI 662669	White	-	X	X	-
265	TKI932	Open pollinated	PI 662576	White	-	X	X	X
266	TKI935	Open pollinated	PI 379109	White	-	X	X	X
267	TKI937	Open pollinated	PI 368388	White	-	X	X	-
268	TKI939	Open pollinated	PI 370359	White	-	X	X	-
269	TKI940	Open pollinated	PI 227232	White	-	X	-	X
270	TKI941	Open pollinated	PI 368380	White	-	X	X	-
271	TKI945	Open pollinated	PI 368382	White	-	X	X	-
272	TKI947	Open pollinated	PI 169048	White	-	X	X	-
273	TKI949	Open pollinated	PI 357403	White	-	X	X	X
274	TKI951	Open pollinated	PI 379107	White	-	X	X	-
275	TKI954	Open pollinated	PI 173643	White	-	X	-	X
276	TKI958	Open pollinated	PI 211581	White	-	X	X	X
277	TKI962	Open pollinated	PI 176442	White	-	X	X	-
278	TKI963	Open pollinated	PI 662573	White	-	X	X	X
279	TKI966	Open pollinated	PI 662706	Red	-	X	-	X
280	TKI967	Open pollinated	PI 214148	NA	-	X	-	-
281	TKI968	Open pollinated	PI 169039	NA	-	X	-	X
282	TKI969	Open pollinated	PI 169045	NA	-	X	X	X
283	TKI971	Open pollinated	PI 194070	Savoy	-	X	-	X
284	TKI974	Open pollinated	PI 357397	White	-	X	-	-
285	TKI978	Open pollinated	PI 368384	Red	-	X	-	X
286	TKI986	Open pollinated	PI 662705	White	-	X	X	-
287	TKI989	Open pollinated	PI 357387	Red	-	X	X	X
288	TKI992	Open pollinated	PI 357407	White	-	X	-	X
289	TKI993	Open pollinated	PI 662575	Savoy	-	X	-	-
290	TKI997	Open pollinated	PI 357377	White	-	X	-	X
291	TKI999	Open pollinated	PI 357392	White	-	X	X	X
292	TKI1001	Open pollinated	PI ??????	White	-	X	X	-
293	TKI1002	Open pollinated	PI 169050	White	-	X	X	-
294	TKI1006	Open pollinated	PI 229747	White	-	X	X	-
295	TKI1008	Open pollinated	PI 379105	White	-	X	X	-
296	TKI1065	Open pollinated	PI 507857	Savoy	-	X	X	X
297	TKI1066	Open pollinated	PI 507856	Savoy	-	X	-	-
298	TKI1081	Open pollinated	PI 662767	White	-	X	-	-
299	TKI1082	Open pollinated	PI 662673	White	-	X	-	-
300	TKI1083	Open pollinated	PI 662766	White	-	X	X	-
301	TKI1084	Open pollinated	PI 662652	White	-	X	X	-
302	TKI1085	Open pollinated	PI 662764	White	-	X	X	-
303	TKI1086	Open pollinated	PI 662649	White	-	X	-	-
304	TKI1087	Open pollinated	PI 662765	White	-	X	X	-
305	TKI1089	Open pollinated	PI 662648	Red	-	X	X	X
306	TKI1090	Open pollinated	PI 662763	White	-	X	X	-
307	TKI1091	Open pollinated	PI 662647	White	-	X	X	-
308	TKI1141	Open pollinated	PI 222971	White	-	-	X	-

## Sheet: Suppl. S2
Supplementary Table S2 2017 Weather Cast
SOURCE: ROYAL NETHERLANDS METEOROLOGICAL INSTITUTE (KNMI)
Station LON(east) LAT(north) ALT(m) NAME
275 5.873 52.056 48.20 Deelen
TG : Etmaalgemiddelde temperatuur (in 0.1 graden Celsius) / Daily mean temperature in (0.1 degrees Celsius)
TN : Minimum temperatuur (in 0.1 graden Celsius) / Minimum temperature (in 0.1 degrees Celsius)
TX : Maximum temperatuur (in 0.1 graden Celsius) / Maximum temperature (in 0.1 degrees Celsius)
SQ : Zonneschijnduur (in 0.1 uur) berekend uit de globale straling (-1 voor <0.05 uur) / Sunshine duration (in 0.1 hour) calculated from global radiation (-1 for <0.05 hour)
Q : Globale straling (in J/cm2) / Global radiation (in J/cm2)
DR : Duur van de neerslag (in 0.1 uur) / Precipitation duration (in 0.1 hour)
RH : Etmaalsom van de neerslag (in 0.1 mm) (-1 voor <0.05 mm) / Daily precipitation amount (in 0.1 mm) (-1 for <0.05 mm)
UX : Maximale relatieve vochtigheid (in procenten) / Maximum relative atmospheric humidity (in percents)
UN : Minimale relatieve vochtigheid (in procenten) / Minimum relative atmospheric humidity (in percents)
EV24 : Referentiegewasverdamping (Makkink) (in 0.1 mm) / Potential evapotranspiration (Makkink) (in 0.1 mm)
YYYYMMDD	TG	TN	TX	SQ	Q	DR	RH	UX	UN	EV24
20170401	112	85	139	4	574	33	20	97	76	9
20170402	110	74	163	73	1310	0	0	99	55	20
20170403	81	15	153	54	1304	0	0	96	54	18
20170404	95	13	170	81	1344	0	0	98	45	19
20170405	81	31	137	29	1070	0	-1	99	50	15
20170406	73	17	114	28	851	0	-1	94	59	12
20170407	97	25	139	16	766	0	0	90	64	11
20170408	94	19	156	55	1366	0	0	91	48	20
20170409	121	4	216	123	2029	0	0	93	31	31
20170410	95	20	140	35	1112	0	-1	94	46	16
20170411	84	9	146	73	1337	0	0	94	49	19
20170412	91	65	116	0	474	32	21	98	69	7
20170413	76	6	127	43	1087	0	0	98	54	15
20170414	77	4	110	8	508	0	-1	98	59	7
20170415	87	34	126	40	1185	37	15	97	52	17
20170416	64	19	105	27	985	17	9	98	62	13
20170417	55	-8	112	81	1638	57	54	99	46	21
20170418	45	-17	109	96	1661	2	1	99	49	21
20170419	32	-25	94	79	1731	0	0	86	39	21
20170420	55	-49	125	129	2264	0	0	91	34	29
20170421	104	68	152	4	748	20	10	96	61	11
20170422	69	22	111	52	1301	15	6	95	46	17
20170423	52	-1	114	53	1283	8	5	97	53	16
20170424	86	11	139	33	1042	22	27	95	62	15
20170425	50	-13	106	103	1885	3	10	95	38	24
20170426	47	-8	105	61	1409	8	9	96	48	18
20170427	41	-28	110	73	1406	0	-1	95	45	17
20170428	69	1	119	53	1219	10	4	94	54	16
20170429	71	-15	137	64	1538	0	0	94	41	21
20170430	124	37	194	118	2391	0	0	68	28	37
20170501	102	75	119	5	652	105	48	99	50	10
20170502	95	59	153	14	900	83	25	99	62	13
20170503	106	72	158	19	970	57	61	98	59	14
20170504	101	68	137	32	1435	19	5	94	68	21
20170505	80	66	106	0	546	21	3	96	77	8
20170506	123	64	190	102	2280	0	0	96	47	35
20170507	120	71	165	47	1318	0	0	97	55	20
20170508	92	34	162	49	1209	0	-1	92	46	17
20170509	67	-17	139	97	1968	0	0	96	39	26
20170510	87	-16	162	126	2591	0	0	95	43	37
20170511	156	58	231	108	2239	0	-1	88	38	37
20170512	158	113	218	43	1432	26	14	95	45	24
20170513	147	85	212	36	1565	8	5	98	51	26
20170514	134	49	216	65	1744	7	18	97	43	28
20170515	151	36	215	107	2584	0	0	97	28	43
20170516	204	145	263	10	1402	0	-1	88	41	26
20170517	232	136	297	96	2374	0	0	90	30	46
20170518	169	147	211	4	893	62	25	96	54	15
20170519	134	110	158	7	751	24	8	95	69	12
20170520	124	64	175	73	1863	3	3	98	50	29
20170521	140	56	202	81	2098	0	0	92	36	34
20170522	183	91	252	101	2523	0	0	88	32	45
20170523	167	84	238	101	2337	0	0	89	38	40
20170524	155	71	228	58	1794	0	0	98	49	30
20170525	167	60	245	131	2728	0	0	99	45	47
20170526	205	106	274	138	2833	0	0	91	34	52
20170527	239	164	319	132	2808	0	0	87	24	54
20170528	207	149	280	93	2373	14	108	97	38	44
20170529	228	152	317	99	2382	0	-1	90	40	45
20170530	191	137	243	49	1669	0	-1	92	53	30
20170531	168	106	227	80	1641	0	0	90	51	28
20170601	170	68	249	141	2840	0	0	91	30	49
20170602	210	113	283	94	2285	0	0	75	35	42
20170603	198	151	256	48	1679	0	-1	85	44	30
20170604	156	73	209	92	1970	2	1	92	40	33
20170605	168	66	226	70	2146	0	0	87	38	37
20170606	140	106	173	27	1092	65	102	92	56	18
20170607	136	108	169	60	1313	30	50	89	59	21
20170608	173	113	234	42	1709	5	1	95	48	30
20170609	164	113	203	70	1505	49	104	95	53	26
20170610	176	102	237	101	2415	0	0	89	44	42
20170611	206	127	280	56	2006	0	-1	93	38	37
20170612	156	127	177	21	965	0	-1	90	55	16
20170613	158	88	196	54	1319	0	0	97	50	22
20170614	173	64	247	142	2939	0	0	97	37	51
20170615	211	143	281	100	2372	0	0	86	35	44
20170616	155	99	181	33	953	0	-1	94	56	16
20170617	176	110	227	8	996	0	0	95	61	17
20170618	205	99	282	117	2537	0	0	97	43	47
20170619	246	156	311	151	2898	0	0	87	28	57
20170620	224	146	292	95	2410	0	0	76	41	46
20170621	212	125	288	135	2643	0	0	80	41	49
20170622	243	175	328	94	2420	5	19	85	27	47
20170623	202	160	248	59	1916	0	0	88	43	35
20170624	167	157	175	0	488	85	35	96	72	8
20170625	172	152	184	4	787	34	56	97	74	14
20170626	171	117	220	109	2539	2	1	96	41	44
20170627	166	103	208	26	1280	10	3	91	55	22
20170628	173	130	207	2	532	67	229	98	90	9
20170629	167	123	209	2	1072	7	7	99	61	18
20170630	165	114	221	11	1420	20	17	98	61	24
20170701	159	122	203	32	952	77	74	98	66	16
20170702	153	84	210	54	1580	16	4	97	55	26
20170703	161	70	220	69	1862	0	-1	97	54	31
20170704	182	141	233	46	1795	6	19	98	51	32
20170705	194	128	250	84	1820	0	0	94	52	33
20170706	202	104	270	89	2300	35	69	98	46	42
20170707	209	152	272	83	1973	22	79	98	59	36
20170708	185	131	249	16	1375	0	-1	98	57	24
20170709	180	100	247	120	2672	0	0	97	46	47
20170710	192	155	253	23	1484	14	66	95	55	27
20170711	172	142	211	15	1255	25	31	95	59	22
20170712	147	106	181	39	905	120	246	98	58	15
20170713	146	81	199	31	1702	0	0	98	48	28
20170714	137	79	182	31	962	28	64	95	67	15
20170715	167	101	210	47	1656	0	0	94	50	28
20170716	180	153	228	9	775	19	17	98	76	14
20170717	182	137	236	144	2825	7	1	98	44	50
20170718	199	128	257	128	2657	0	0	88	46	48
20170719	233	175	304	76	1947	0	-1	88	46	37
20170720	193	137	249	40	1441	33	118	98	60	26
20170721	181	118	231	131	2705	0	0	96	40	48
20170722	206	160	260	59	2026	26	80	97	45	37
20170723	159	137	196	70	1841	31	26	98	68	31
20170724	154	132	206	32	1479	21	15	98	55	25
20170725	157	132	185	13	848	68	90	98	73	14
20170726	184	132	230	74	1996	4	1	99	53	35
20170727	177	137	216	42	1601	6	2	96	53	28
20170728	165	132	207	32	1300	16	18	91	63	22
20170729	183	157	204	3	812	11	8	98	74	14
20170730	186	130	240	64	1460	8	9	98	61	26
20170731	178	108	232	79	2012	0	0	92	51	35
20170801	178	128	226	28	1209	0	0	95	43	21
20170802	181	142	224	21	1394	38	14	95	47	25
20170803	191	159	226	79	1781	37	27	96	53	32
20170804	172	134	217	58	1234	7	8	93	56	21
20170805	153	99	203	25	885	19	21	97	53	15
20170806	150	82	217	89	1843	0	0	99	46	30
20170807	168	78	234	121	2288	0	0	96	44	39
20170808	163	133	207	4	618	38	26	97	66	10
20170809	162	118	216	84	1830	0	0	96	46	31
20170810	161	123	212	4	933	42	43	98	56	16
20170811	161	129	200	23	1303	3	1	98	57	22
20170812	161	115	212	20	835	60	66	98	69	14
20170813	155	87	218	72	1587	3	3	99	55	26
20170814	189	123	250	113	2177	0	0	92	45	39
20170815	184	138	245	17	858	20	232	98	61	15
20170816	176	128	231	67	1790	0	0	99	58	31
20170817	169	120	197	0	546	37	66	98	77	9
20170818	164	116	208	18	1001	13	29	97	73	17
20170819	147	117	189	69	1344	31	53	97	58	22
20170820	149	112	198	74	1445	5	1	97	50	24
20170821	156	95	218	71	1563	0	-1	96	50	26
20170822	179	127	239	83	1885	0	0	89	46	33
20170823	197	124	265	89	1866	0	0	90	45	34
20170824	178	110	233	41	1138	0	0	96	51	20
20170825	171	96	236	90	1756	0	0	96	48	30
20170826	189	124	251	72	1732	0	0	93	45	31
20170827	178	118	247	80	1752	0	0	99	44	31
20170828	190	109	265	85	1738	0	0	91	46	31
20170829	219	131	292	85	1794	0	-1	92	46	34
20170830	189	139	235	10	866	42	245	98	76	15
20170831	141	90	192	50	1142	31	44	98	54	18
20170901	148	94	204	41	1199	12	13	97	53	20
20170902	134	74	192	74	1443	4	20	97	52	23
20170903	133	57	201	100	1765	0	0	97	50	28
20170904	164	98	227	100	1778	0	0	93	43	30
20170905	186	154	225	20	810	4	32	98	70	14
20170906	155	120	191	25	943	26	35	98	55	16
20170907	151	128	183	28	948	15	7	96	65	16
20170908	146	138	156	0	267	155	185	97	88	4
20170909	135	97	178	47	1148	48	65	98	72	18
20170910	134	82	176	77	1296	5	4	98	64	21
20170911	141	109	174	51	942	34	65	95	62	15
20170912	138	111	177	89	1411	8	14	96	61	23
20170913	133	102	168	45	918	85	151	97	56	15
20170914	112	92	147	24	726	66	128	98	75	11
20170915	113	86	160	58	1142	18	21	98	68	17
20170916	99	61	125	5	423	76	62	99	89	6
20170917	106	47	165	44	1240	0	-1	99	62	18
20170918	109	78	147	15	705	29	57	99	80	11
20170919	108	74	165	30	971	0	0	99	62	15
20170920	123	74	172	30	793	19	9	98	65	12
20170921	130	86	184	103	1353	0	0	94	57	21
20170922	130	64	193	46	1056	0	0	99	61	17
20170923	112	55	184	96	1503	0	0	99	55	23
20170924	128	59	195	79	1323	0	0	99	64	21
20170925	142	99	176	10	513	0	0	98	71	8
20170926	134	114	167	0	569	0	0	99	78	9
20170927	148	107	206	63	1130	0	0	99	57	19
20170928	158	135	196	27	694	40	28	98	76	12
20170929	175	136	220	38	971	18	149	99	71	17
20170930	129	81	160	9	274	83	66	98	89	4
Mean	149.109	92.3224	202.104	58.1749	1500.39	15.5082	22.6557	94.8852	53.4098	25.0164

## Sheet: Suppl. S3
Supplementary Table S3 2018 Weather Cast
SOURCE: ROYAL NETHERLANDS METEOROLOGICAL INSTITUTE (KNMI)
Station LON(east) LAT(north) ALT(m) NAME
275 5.873 52.056 48.20 Deelen
TG : Etmaalgemiddelde temperatuur (in 0.1 graden Celsius) / Daily mean temperature in (0.1 degrees Celsius)
TN : Minimum temperatuur (in 0.1 graden Celsius) / Minimum temperature (in 0.1 degrees Celsius)
TX : Maximum temperatuur (in 0.1 graden Celsius) / Maximum temperature (in 0.1 degrees Celsius)
SQ : Zonneschijnduur (in 0.1 uur) berekend uit de globale straling (-1 voor <0.05 uur) / Sunshine duration (in 0.1 hour) calculated from global radiation (-1 for <0.05 hour)
Q : Globale straling (in J/cm2) / Global radiation (in J/cm2)
DR : Duur van de neerslag (in 0.1 uur) / Precipitation duration (in 0.1 hour)
RH : Etmaalsom van de neerslag (in 0.1 mm) (-1 voor <0.05 mm) / Daily precipitation amount (in 0.1 mm) (-1 for <0.05 mm)
UX : Maximale relatieve vochtigheid (in procenten) / Maximum relative atmospheric humidity (in percents)
UN : Minimale relatieve vochtigheid (in procenten) / Minimum relative atmospheric humidity (in percents)
EV24 : Referentiegewasverdamping (Makkink) (in 0.1 mm) / Potential evapotranspiration (Makkink) (in 0.1 mm)
YYYYMMDD	TG	TN	TX	SQ	Q	DR	RH	UX	UN	EV24
20180401	50	-8	88	11	674	8	4	99	68	9
20180402	74	-9	124	16	854	35	18	97	55	12
20180403	128	89	175	57	1334	3	1	91	55	21
20180404	100	66	143	17	780	33	50	96	69	11
20180405	54	-17	92	39	906	24	19	94	49	12
20180406	86	-16	158	118	1936	0	0	92	24	27
20180407	139	82	222	103	1680	0	0	83	36	27
20180408	150	56	238	70	1586	0	0	90	27	26
20180409	137	93	183	16	1095	0	0	91	56	18
20180410	161	119	217	41	1394	0	-1	85	38	24
20180411	126	65	186	36	1252	6	14	98	58	20
20180412	111	72	160	27	874	0	-1	96	67	13
20180413	100	25	162	4	970	0	0	99	66	14
20180414	109	43	167	41	1225	11	22	98	53	18
20180415	129	89	175	32	1123	47	36	98	64	18
20180416	114	28	171	93	1856	0	-1	98	49	28
20180417	122	22	213	116	2050	0	0	95	35	32
20180418	167	50	248	130	2146	0	0	90	25	37
20180419	207	103	288	130	2204	0	0	79	23	41
20180420	191	97	273	127	2170	0	0	90	34	39
20180421	151	69	222	124	2094	0	0	98	36	35
20180422	177	103	275	86	1852	6	31	98	36	32
20180423	125	73	171	84	1681	0	0	85	48	26
20180424	121	87	147	11	639	3	2	86	68	10
20180425	113	74	143	28	964	27	37	93	47	15
20180426	96	32	146	87	1730	14	61	93	45	25
20180427	104	26	164	48	1309	0	0	94	46	19
20180428	119	72	156	3	910	4	2	94	61	14
20180429	102	32	146	10	636	66	71	98	84	9
20180430	95	54	137	19	683	98	209	98	61	10
20180501	79	50	125	61	1544	89	49	92	34	21
20180502	117	37	173	123	2297	0	-1	91	37	35
20180503	98	27	162	123	2367	0	0	98	37	34
20180504	120	28	189	138	2574	0	0	92	36	40
20180505	151	67	226	137	2616	0	0	78	28	43
20180506	186	99	260	142	2708	0	0	63	26	48
20180507	192	123	260	140	2701	0	0	72	27	48
20180508	206	133	275	141	2663	0	0	66	25	49
20180509	202	113	282	140	2504	0	0	82	28	46
20180510	122	50	170	46	1209	19	12	97	55	19
20180511	126	14	198	93	2262	0	0	98	44	35
20180512	181	100	242	105	2245	0	0	81	33	39
20180513	142	119	175	4	751	41	38	96	68	12
20180514	192	118	269	109	2455	0	0	99	34	44
20180515	189	123	249	141	2593	0	0	84	30	46
20180516	154	81	229	69	1702	17	4	89	50	28
20180517	108	37	161	118	2752	0	0	92	50	41
20180518	99	19	154	51	1855	0	0	97	52	27
20180519	98	46	135	11	632	60	13	98	76	9
20180520	158	21	245	133	2665	0	0	99	41	45
20180521	194	114	259	128	2684	0	0	63	29	48
20180522	183	135	261	45	1765	20	47	95	35	31
20180523	186	142	257	59	1667	0	-1	96	36	30
20180524	183	135	229	29	1339	9	2	88	54	24
20180525	201	150	255	59	1890	0	-1	90	51	34
20180526	226	156	291	125	2476	0	0	87	34	47
20180527	209	169	280	52	1704	7	1	78	43	32
20180528	238	153	305	121	2579	0	0	88	33	50
20180529	221	178	312	72	1862	47	301	97	41	35
20180530	215	160	274	118	2479	0	0	99	49	46
20180531	212	157	264	64	1758	0	0	95	62	33
20180601	178	135	239	13	1110	27	30	99	68	19
20180602	171	150	193	0	733	23	8	98	76	13
20180603	194	150	247	34	1413	0	0	97	55	25
20180604	182	152	237	56	1616	0	0	98	59	28
20180605	168	132	227	74	1800	0	-1	92	53	31
20180606	206	117	287	153	2867	0	0	93	34	53
20180607	229	134	294	139	2791	0	0	88	29	53
20180608	182	166	215	4	762	55	143	96	71	13
20180609	205	160	266	99	2511	0	0	92	50	46
20180610	185	126	245	115	2620	0	0	96	56	46
20180611	174	104	236	112	2748	0	0	93	50	48
20180612	144	117	180	17	1266	0	0	92	64	21
20180613	135	86	183	33	1207	5	5	95	54	19
20180614	153	96	201	34	1389	40	18	98	56	23
20180615	181	133	236	65	2059	0	0	99	45	36
20180616	176	128	247	54	2058	0	0	90	39	36
20180617	153	127	185	11	1120	0	0	89	60	19
20180618	160	129	187	15	780	9	2	94	68	13
20180619	175	138	201	2	742	1	1	92	75	13
20180620	191	141	259	77	2005	0	0	98	51	36
20180621	146	104	174	88	2167	5	3	97	42	35
20180622	132	90	165	22	1333	7	4	84	55	21
20180623	144	82	196	42	1487	0	-1	88	48	24
20180624	141	93	175	5	1014	0	-1	95	63	16
20180625	160	93	219	81	2044	0	0	98	47	34
20180626	167	74	244	123	2873	0	0	96	39	49
20180627	187	103	265	119	2681	0	0	95	52	48
20180628	219	144	290	138	2649	0	0	95	32	50
20180629	208	139	283	155	2999	0	0	87	29	55
20180630	213	132	284	153	3059	0	0	92	20	57
20180701	210	151	263	155	3100	0	0	50	23	57
20180702	205	123	273	155	3075	0	0	64	24	56
20180703	207	126	288	141	2962	0	0	79	26	55
20180704	203	126	287	103	2397	0	0	90	34	44
20180705	189	125	259	141	2812	0	0	95	39	50
20180706	198	134	262	85	2415	0	0	90	35	44
20180707	186	98	260	146	2785	0	0	84	32	49
20180708	179	82	251	151	2925	0	0	94	33	51
20180709	169	92	231	30	1543	0	-1	97	54	27
20180710	161	120	220	64	1395	16	21	95	45	24
20180711	170	76	232	65	1668	0	-1	96	54	29
20180712	193	118	264	136	2845	0	0	97	39	51
20180713	187	102	269	126	2776	0	0	99	38	49
20180714	191	112	263	144	2858	0	0	93	37	51
20180715	214	126	291	150	2892	0	0	89	26	54
20180716	233	155	306	137	2716	0	0	73	24	52
20180717	212	126	281	129	2575	0	0	89	38	48
20180718	196	91	260	87	2020	0	0	93	34	37
20180719	210	128	277	59	1701	0	0	89	33	32
20180720	197	83	273	122	2510	0	0	97	33	45
20180721	216	135	291	115	2372	0	0	88	35	44
20180722	208	132	289	113	2241	0	0	94	29	41
20180723	225	113	312	117	2397	0	0	95	36	46
20180724	259	169	332	102	2232	0	0	91	30	45
20180725	267	210	334	117	2416	0	0	65	32	49
20180726	290	194	370	118	2538	0	-1	80	23	53
20180727	303	244	361	140	2566	0	0	43	19	54
20180728	211	119	275	68	1548	14	82	92	44	29
20180729	222	121	278	45	1775	0	-1	81	28	34
20180730	251	181	322	93	2201	0	-1	87	32	43
20180731	221	146	285	110	2282	0	0	91	39	43
20180801	213	125	283	61	1718	0	0	94	37	32
20180802	235	131	322	112	2270	0	0	89	32	44
20180803	250	142	334	140	2480	0	0	90	30	49
20180804	231	161	308	105	2068	0	0	95	41	40
20180805	206	143	272	135	2457	0	0	98	38	45
20180806	242	155	325	141	2557	0	0	79	23	50
20180807	269	139	356	115	2354	2	2	87	17	48
20180808	199	114	248	15	1025	24	19	92	52	19
20180809	176	101	238	46	953	46	109	97	45	17
20180810	170	123	219	90	1836	33	93	97	43	32
20180811	155	99	221	97	1999	0	-1	98	41	33
20180812	203	87	275	55	1856	0	0	91	36	34
20180813	184	154	226	15	776	36	128	98	54	14
20180814	192	166	239	67	1725	7	9	98	49	31
20180815	189	157	232	15	960	0	-1	92	63	17
20180816	188	142	246	86	1560	0	0	96	50	28
20180817	170	101	233	54	1606	37	110	98	48	28
20180818	173	95	220	53	1267	0	0	97	59	22
20180819	197	159	241	38	1370	0	0	89	59	25
20180820	194	138	229	28	867	0	0	97	64	16
20180821	202	151	256	21	1028	0	0	97	57	19
20180822	202	134	272	93	1783	0	0	98	51	33
20180823	183	120	236	15	998	16	36	99	61	18
20180824	158	117	199	62	1484	0	-1	99	46	25
20180825	121	85	169	53	1303	70	168	98	67	20
20180826	141	52	204	85	1802	14	8	99	48	29
20180827	165	125	210	14	816	42	27	98	63	14
20180828	175	143	220	35	1159	0	0	91	53	20
20180829	171	119	241	32	1011	63	132	98	56	17
20180830	148	81	201	90	1787	0	0	98	50	29
20180831	126	59	198	39	1179	0	0	97	50	18
20180901	138	60	212	112	1830	0	0	97	40	29
20180902	169	105	234	106	1810	0	0	97	39	31
20180903	190	154	236	14	870	0	-1	97	66	16
20180904	195	163	258	43	1038	19	85	99	57	19
20180905	204	164	256	61	1388	1	1	93	57	25
20180906	166	138	198	7	529	47	176	98	80	9
20180907	141	114	176	74	1322	24	80	98	51	21
20180908	143	99	193	51	1344	0	-1	94	54	22
20180909	177	122	232	59	1459	0	0	85	53	25
20180910	172	144	202	13	837	0	0	98	64	14
20180911	187	137	241	37	1138	0	0	90	55	20
20180912	150	115	187	1	487	31	22	98	86	8
20180913	131	65	198	87	1575	0	0	98	44	25
20180914	129	43	201	91	1603	0	0	97	48	25
20180915	143	85	197	49	1085	0	0	95	55	18
20180916	150	85	222	71	1400	0	0	94	47	23
20180917	167	92	242	103	1551	0	0	94	39	27
20180918	198	147	267	114	1618	0	0	88	44	29
20180919	191	138	241	96	1490	0	0	90	49	27
20180920	198	160	241	80	1242	0	0	82	51	23
20180921	152	98	201	48	998	32	116	95	46	17
20180922	113	84	159	23	727	74	64	98	66	11
20180923	93	63	108	6	246	111	138	98	92	4
20180924	92	36	156	95	1333	7	7	99	48	19
20180925	88	24	157	67	1122	0	0	99	52	16
20180926	121	43	186	82	1404	0	0	93	45	22
20180927	136	58	213	106	1487	0	0	97	39	24
20180928	108	28	162	48	968	0	-1	97	49	14
20180929	72	3	159	102	1360	0	0	97	46	18
20180930	96	1	176	77	1245	0	-1	97	52	18
Mean	168.995	104.066	229.284	76.765	1753.58	8.91803	15.6831	91.847	46.153	30.5574

## Sheet: Suppl. S4
Supplementary Table S4 2019 Weather Cast
SOURCE: ROYAL NETHERLANDS METEOROLOGICAL INSTITUTE (KNMI)
Station LON(east) LAT(north) ALT(m) NAME
275 5.873 52.056 48.20 Deelen
TG : Etmaalgemiddelde temperatuur (in 0.1 graden Celsius) / Daily mean temperature in (0.1 degrees Celsius)
TN : Minimum temperatuur (in 0.1 graden Celsius) / Minimum temperature (in 0.1 degrees Celsius)
TX : Maximum temperatuur (in 0.1 graden Celsius) / Maximum temperature (in 0.1 degrees Celsius)
SQ : Zonneschijnduur (in 0.1 uur) berekend uit de globale straling (-1 voor <0.05 uur) / Sunshine duration (in 0.1 hour) calculated from global radiation (-1 for <0.05 hour)
Q : Globale straling (in J/cm2) / Global radiation (in J/cm2)
DR : Duur van de neerslag (in 0.1 uur) / Precipitation duration (in 0.1 hour)
RH : Etmaalsom van de neerslag (in 0.1 mm) (-1 voor <0.05 mm) / Daily precipitation amount (in 0.1 mm) (-1 for <0.05 mm)
UX : Maximale relatieve vochtigheid (in procenten) / Maximum relative atmospheric humidity (in percents)
UN : Minimale relatieve vochtigheid (in procenten) / Minimum relative atmospheric humidity (in percents)
EV24 : Referentiegewasverdamping (Makkink) (in 0.1 mm) / Potential evapotranspiration (Makkink) (in 0.1 mm)
YYYYMMDD	TG	TN	TX	SQ	Q	DR	RH	UX	UN	EV24
20190401	73	-2	143	118	1936	0	0	78	36	26
20190402	97	56	160	49	998	24	42	92	51	14
20190403	70	44	93	3	815	4	4	91	66	11
20190404	52	21	92	7	677	0	0	95	60	9
20190405	69	-2	115	58	1237	0	0	94	62	17
20190406	106	72	158	40	1053	0	0	91	57	16
20190407	146	91	213	105	1785	0	-1	85	33	29
20190408	145	88	212	100	1844	0	0	83	24	30
20190409	90	45	149	121	2051	0	0	81	41	29
20190410	57	7	117	125	2150	0	0	77	36	28
20190411	56	-6	114	103	1894	0	0	85	38	24
20190412	39	-5	81	26	954	0	0	86	46	12
20190413	20	-23	74	80	1626	3	2	94	49	19
20190414	55	-19	115	95	1862	0	-1	95	38	24
20190415	108	45	172	115	2071	0	0	86	28	31
20190416	119	54	188	121	2050	0	0	79	33	32
20190417	132	72	170	19	1023	0	-1	83	51	16
20190418	166	106	220	109	2126	0	0	56	27	36
20190419	172	96	244	127	2261	0	0	57	20	39
20190420	170	96	247	132	2276	0	0	63	22	39
20190421	158	77	243	132	2314	0	0	60	22	39
20190422	180	102	253	124	2222	0	0	60	22	39
20190423	159	93	219	108	1908	0	0	65	35	32
20190424	172	99	268	66	1773	37	82	93	26	31
20190425	126	79	192	43	1461	35	69	96	50	23
20190426	120	85	177	41	1408	0	-1	95	41	22
20190427	97	69	133	30	1172	36	15	91	57	17
20190428	93	49	145	47	1527	0	-1	91	43	22
20190429	102	16	165	82	1875	0	0	95	45	28
20190430	92	25	134	30	846	0	0	98	63	12
20190501	95	22	164	66	1858	0	0	96	51	27
20190502	91	14	162	46	1187	21	26	98	60	17
20190503	77	44	113	26	1320	47	17	94	47	18
20190504	48	-4	105	86	1686	13	21	98	46	21
20190505	61	1	113	59	1662	0	-1	95	43	22
20190506	63	2	117	18	1146	6	7	94	56	15
20190507	78	16	127	18	1149	0	-1	95	45	16
20190508	94	57	136	5	824	36	80	95	54	12
20190509	117	68	166	61	1704	7	11	93	55	26
20190510	99	59	132	24	941	10	4	94	60	14
20190511	94	23	154	116	2353	0	0	91	40	34
20190512	78	-3	147	75	1722	0	-1	93	41	24
20190513	90	-14	164	132	2755	0	0	93	24	39
20190514	107	29	170	126	2606	0	0	91	34	39
20190515	117	47	178	137	2795	0	0	82	28	43
20190516	115	52	182	43	1799	0	0	85	35	27
20190517	111	86	136	3	846	14	3	96	60	13
20190518	154	62	226	89	2044	0	0	98	38	34
20190519	161	108	245	58	1859	28	26	98	41	31
20190520	138	118	171	1	798	0	0	98	72	13
20190521	118	105	132	0	390	19	3	98	84	6
20190522	130	52	192	88	2156	0	0	91	38	34
20190523	146	46	227	134	2649	0	0	89	22	43
20190524	155	64	241	101	2346	0	0	94	28	39
20190525	129	54	185	41	1612	0	0	94	47	25
20190526	155	63	216	16	1443	28	34	95	53	24
20190527	140	72	187	67	1784	0	-1	94	43	29
20190528	106	45	153	26	1067	81	167	95	58	16
20190529	125	11	191	133	2746	0	-1	95	38	43
20190530	166	129	215	23	896	0	-1	95	61	15
20190531	175	109	218	82	2149	0	0	91	53	37
20190601	190	97	264	144	2751	0	0	95	42	49
20190602	235	145	314	131	2748	4	3	91	28	53
20190603	175	126	212	21	1448	0	0	91	57	25
20190604	190	96	250	82	2087	13	97	96	39	37
20190605	179	140	217	47	1530	9	103	96	56	27
20190606	143	102	193	68	1580	22	44	97	49	26
20190607	163	91	242	79	2120	4	6	91	39	36
20190608	144	99	183	51	1154	6	11	78	53	19
20190609	154	89	207	64	2145	0	0	84	41	36
20190610	182	129	241	53	2097	7	2	91	45	37
20190611	155	120	204	75	2242	27	9	94	49	37
20190612	152	111	196	60	1304	24	177	96	63	22
20190613	145	110	194	80	2046	23	116	94	47	33
20190614	179	111	241	76	1989	0	-1	95	45	35
20190615	166	112	203	38	1426	56	98	97	66	24
20190616	169	115	215	99	2142	0	0	97	55	37
20190617	193	98	263	139	2686	0	0	95	40	48
20190618	217	132	279	91	2209	0	0	92	38	41
20190619	200	154	262	71	1806	0	-1	95	54	33
20190620	173	103	218	67	1955	0	-1	96	54	34
20190621	152	99	211	103	2112	0	-1	93	48	35
20190622	175	82	242	116	2462	0	0	93	45	43
20190623	229	140	298	128	2701	0	0	83	35	52
20190624	259	193	318	120	2740	0	0	69	39	55
20190625	277	216	342	103	2516	0	0	84	40	51
20190626	208	150	263	102	2515	0	0	98	55	46
20190627	171	114	235	137	3026	0	0	88	49	52
20190628	184	113	255	113	2815	0	0	85	40	50
20190629	240	131	327	155	3082	0	0	88	23	60
20190630	223	137	269	136	2679	0	0	79	40	51
20190701	177	105	236	113	2343	0	0	96	43	41
20190702	165	95	225	104	2249	1	1	91	33	38
20190703	142	62	206	80	2012	0	0	96	38	33
20190704	165	46	241	136	2782	0	0	94	37	47
20190705	192	116	256	126	2830	0	0	92	33	51
20190706	166	102	256	62	1676	33	24	98	49	29
20190707	136	82	189	38	1673	0	0	98	47	27
20190708	134	79	173	38	1275	0	-1	93	58	20
20190709	149	73	210	105	2458	0	-1	94	35	40
20190710	138	61	193	2	1132	51	30	97	38	18
20190711	186	123	245	41	1578	6	6	97	50	28
20190712	162	113	229	28	1087	39	203	97	52	18
20190713	167	140	208	40	1530	9	11	97	61	26
20190714	154	132	188	28	1339	1	1	94	63	22
20190715	148	127	186	27	1070	0	-1	92	62	18
20190716	149	98	179	0	801	0	-1	97	67	13
20190717	168	83	238	72	1989	0	0	97	49	34
20190718	192	138	246	43	1870	2	2	93	46	34
20190719	196	146	246	36	1742	0	-1	95	42	32
20190720	192	155	238	49	1205	31	225	93	60	22
20190721	183	125	239	96	2244	0	0	98	48	40
20190722	207	130	273	96	2444	0	0	92	49	45
20190723	248	140	328	147	2732	0	0	94	29	54
20190724	286	210	370	130	2606	0	0	79	23	54
20190725	301	167	392	131	2519	0	0	94	23	53
20190726	301	230	375	126	2564	0	0	67	22	54
20190727	242	173	320	93	2219	0	0	97	33	43
20190728	206	168	273	50	1677	0	0	99	53	31
20190729	205	140	270	108	2401	0	0	95	37	44
20190730	225	129	303	109	2225	0	0	96	31	42
20190731	183	144	227	43	1423	4	16	83	57	25
20190801	180	134	226	47	1479	2	7	94	62	26
20190802	171	131	215	28	940	38	258	98	73	16
20190803	164	125	199	1	790	4	1	99	70	13
20190804	191	106	255	73	1832	0	0	99	46	33
20190805	210	172	253	57	1773	0	-1	88	48	33
20190806	188	148	238	71	1803	0	-1	89	48	32
20190807	191	152	243	98	2034	0	-1	88	43	36
20190808	182	127	246	68	1751	0	0	87	42	31
20190809	198	146	229	4	625	29	94	96	66	11
20190810	200	165	239	90	1635	4	9	87	43	30
20190811	180	142	223	56	1666	0	0	82	47	29
20190812	161	128	230	95	1769	23	70	99	47	30
20190813	134	95	188	57	1461	48	118	98	60	23
20190814	160	103	220	88	2015	45	41	96	46	34
20190815	168	127	214	36	1040	31	76	98	65	18
20190816	170	100	216	65	1656	14	7	98	58	29
20190817	172	158	197	1	402	48	65	98	80	7
20190818	162	128	194	24	860	39	15	98	74	15
20190819	156	119	209	86	1610	2	1	93	53	27
20190820	154	84	215	114	1932	0	0	97	46	32
20190821	153	79	223	119	2017	0	0	98	39	34
20190822	172	96	246	128	2210	0	0	95	40	38
20190823	186	90	267	123	2092	0	0	98	28	37
20190824	217	146	301	132	2221	0	0	76	29	42
20190825	228	128	313	130	2138	0	0	87	29	41
20190826	251	170	322	115	1953	0	0	84	44	39
20190827	246	166	334	95	1881	0	0	94	35	37
20190828	234	185	296	90	1766	13	7	98	44	34
20190829	183	111	230	48	1219	16	52	98	58	22
20190830	163	91	237	125	2036	0	0	99	42	35
20190831	200	102	294	111	1952	7	82	98	36	36
20190901	160	103	206	56	1311	0	-1	98	45	22
20190902	145	90	207	84	1641	0	0	94	45	27
20190903	158	128	195	8	617	0	-1	89	66	10
20190904	151	114	192	9	654	30	58	99	67	11
20190905	127	57	170	72	1385	6	14	97	59	22
20190906	134	69	182	46	1311	4	10	97	51	21
20190907	136	107	179	43	1174	12	27	99	67	19
20190908	130	65	177	58	1328	0	0	97	51	21
20190909	110	41	187	62	1209	0	0	99	48	18
20190910	122	40	193	54	1239	0	0	99	47	19
20190911	138	73	169	12	431	67	35	98	83	7
20190912	186	167	220	65	1182	3	6	98	61	21
20190913	166	102	211	73	1418	9	6	98	48	24
20190914	130	67	209	110	1710	0	0	95	39	27
20190915	154	62	236	73	1478	0	0	98	43	25
20190916	129	82	156	8	448	63	75	99	81	7
20190917	113	56	185	46	1009	0	-1	99	52	15
20190918	100	26	173	82	1332	0	0	98	49	19
20190919	107	50	170	68	1205	0	0	97	52	18
20190920	118	34	193	100	1576	0	0	97	41	24
20190921	163	82	237	112	1650	0	0	79	34	28
20190922	192	124	280	86	1385	8	3	97	43	25
20190923	163	130	206	31	843	34	9	98	60	14
20190924	150	126	189	1	556	65	63	98	68	9
20190925	152	130	176	11	571	17	15	98	68	9
20190926	156	139	177	0	240	79	136	98	91	4
20190927	154	134	193	56	980	0	0	96	61	16
20190928	153	136	181	34	756	7	6	91	71	13
20190929	145	129	162	0	221	145	318	98	86	4
20190930	139	121	175	57	926	48	40	96	65	15
Mean	154.464	94.4918	211.393	72.0984	1692.02	9.73224	19.1038	91.9126	47.5519	28.5027

## Sheet: Suppl. S5
Supplementary Table S5 Descriptive statistics of the phenotypic values scored for leaf and head traits for the 139 common accessions. The number of accessions (n), Standard Deviation (S.D.), Coefficient of Variation (C.V.), Least Significant Different (LSD) test group (LSD). LSD groups are limited within year and trait
Trait	Year	Crop type	n	Mean ± S.D.	C.V.	Overall mean	C.V.	LSD group
Leaf Area (HS)	2017	White	87	852.26 ± 318.85	0.37	876.25 ± 314.29	0.358676	a
		Red	24	954.33 ± 297.39	0.31			a
		Savoy	21	882.05 ± 336.08	0.38			a
		Pointed	7	889.73 ± 257.12	0.28			a
	2018	White	87	579.59 ± 125.03	0.21	556.64 ± 129.62	0.232861	a
		Red	24	487.16 ± 102.01	0.2			b
		Savoy	21	510.64 ± 130.33	0.25			b
		Pointed	7	647.52 ± 147.83	0.22			a
	2019	White	83	789.90 ± 227.23	0.28	807.50 ± 235.89	0.292124	a
		Red	24	877.65 ± 207.79	0.23			a
		Savoy	21	770.72 ± 242.92	0.31			a
		Pointed	7	886.09 ± 372.71	0.42			a
Leaf Length (HS)	2017	White	87	36.60 ± 7.69	0.21	37.28 ± 7.73	0.20735	a
		Red	24	39.97 ± 6.46	0.16			a
		Savoy	21	37.01 ± 8.32	0.22			a
		Pointed	7	37.24 ± 6.18	0.16			a
	2018	White	87	33.45 ± 4.15	0.12	33.21 ± 4.73	0.142427	a
		Red	24	34.78 ± 4.22	0.12			a
		Savoy	21	29.70 ± 5.53	0.18			b
		Pointed	7	35.31 ± 6.30	0.17			a
	2019	White	83	39.19 ± 7.87	0.2	40.25 ± 8.22	0.204224	b
		Red	24	46.21 ± 7.01	0.15			a
		Savoy	21	37.95 ± 7.32	0.19			b
		Pointed	7	39.44 ± 10.92	0.27			ab
Leaf Width (HS)	2017	White	87	32.71 ± 6.81	0.2	33.07 ± 6.57	0.198669	a
		Red	24	34.27 ± 6.53	0.19			a
		Savoy	21	33.09 ± 6.38	0.19			a
		Pointed	7	33.29 ± 4.76	0.14			a
	2018	White	87	27.03 ± 3.87	0.14	26.29 ± 3.80	0.144542	a
		Red	24	23.95 ± 2.80	0.11			a
		Savoy	21	25.35 ± 3.30	0.13			ab
		Pointed	7	27.85 ± 3.82	0.13			a
	2019	White	83	31.92 ± 5.01	0.15	32.09 ± 4.99	0.1555	a
		Red	24	33.31 ± 4.68	0.14			a
		Savoy	21	30.93 ± 4.31	0.13			a
		Pointed	7	33.46 ± 7.41	0.22			a
Leaf Ratio ((HS)	2017	White	87	1.21 ± 0.28	0.23	1.19 ± 0.25	0.210084	a
		Red	24	1.14 ± 0.24	0.21			a
		Savoy	21	1.18 ± 0.12	0.1			a
		Pointed	7	1.16 ± 0.13	0.11			a
	2018	White	87	1.23 ± 0.23	0.18	1.26 ± 0.22	0.174603	b
		Red	24	1.44 ± 0.17	0.12			a
		Savoy	21	1.19 ± 0.18	0.15			b
		Pointed	7	1.26 ± 0.21	0.16			ab
	2019	White	83	1.24 ± 0.19	0.15	1.26 ± 0.19	0.150794	b
		Red	24	1.38 ± 0.18	0.13			a
		Savoy	21	1.22 ± 0.13	0.11			b
		Pointed	7	1.19 ± 0.23	0.19			b
Head Area	2017	White	79	355.52 ± 86.68	0.24	346.57 ± 80.74	0.232969	a
		Red	24	296.49 ± 44.72	0.15			b
		Savoy	18	347.87 ± 62.31	0.17			ab
		Pointed	7	413.87 ± 72.61	0.17			a
	2018	White	75	386.42 ± 135.14	0.34	362.96 ± 146.74	0.404287	b
		Red	24	206.50 ± 76.28	0.36			c
		Savoy	19	395.54 ± 108.32	0.27			b
		Pointed	7	559.56 ± 95.08	0.16			a
	2019	White	74	222.88 ± 67.81	0.3	197.98 ± 75.56	0.381655	a
		Red	24	118.96 ± 47.15	0.39			c
		Savoy	18	177.65 ± 56.77	0.31			b
		Pointed	6	267.87 ± 57.95	0.21			a
Head Width	2017	White	79	22.06 ± 3.49	0.15	21.27 ± 3.53	0.165961	a
		Red	24	18.38 ± 2.63	0.14			b
		Savoy	18	21.51 ± 3.10	0.14			ab
		Pointed	7	21.62 ± 3.26	0.15			ab
	2018	White	75	23.86 ± 4.72	0.19	23.09 ± 5.73	0.248159	b
		Red	24	16.34 ± 4.04	0.24			c
		Savoy	19	25.51 ± 3.92	0.15			b
		Pointed	7	31.31 ± 2.92	0.09			a
	2019	White	74	17.96 ± 3.75	0.2	16.26 ± 4.31	0.265068	a
		Red	24	11.45 ± 3.06	0.26			c
		Savoy	18	15.40 ± 3.34	0.21			b
		Pointed	6	17.05 ± 2.62	0.15			ab
Head Height	2017	White	79	20.18 ± 2.90	0.14	20.65 ± 3.13	0.151574	b
		Red	24	20.17 ± 2.05	0.1			b
		Savoy	18	20.96 ± 2.96	0.14			b
		Pointed	7	26.79 ± 2.99	0.11			a
	2018	White	75	21.25 ± 4.55	0.21	20.82 ± 4.80	0.230548	b
		Red	24	16.57 ± 2.74	0.16			c
		Savoy	19	22.07 ± 4.17	0.18			b
		Pointed	7	27.41 ± 3.23	0.11			a
	2019	White	74	15.56 ± 2.29	0.14	15.37 ± 2.97	0.193234	b
		Red	24	13.46 ± 1.63	0.12			c
		Savoy	18	14.61 ± 2.43	0.16			bc
		Pointed	6	22.92 ± 4.05	0.17			a
Head Ratio	2017	White	79	0.88 ± 0.13	0.15	0.95 ± 0.19	0.2	c
		Red	24	1.09 ± 0.19	0.17			ab
		Savoy	18	0.96 ± 0.16	0.17			bc
		Pointed	7	1.28 ± 0.29	0.22			a
	2018	White	75	0.91 ± 0.12	0.13	0.94 ± 0.13	0.138298	b
		Red	24	1.06 ± 0.14	0.14			a
		Savoy	19	0.93 ± 0.12	0.13			b
		Pointed	7	0.93 ± 0.12	0.13			ab
	2019	White	74	0.89 ± 0.13	0.15	0.98 ± 0.23	0.234694	b
		Red	24	1.20 ± 0.25	0.2			a
		Savoy	18	0.98 ± 0.19	0.2			b
		Pointed	6	1.37 ± 0.34	0.25			a

## Sheet: Suppl. S6
Supplementary Table S6 Descriptive statistics of the phenotypic values scored for leaf and head remaining traits for all accessions. The number of accessions (n), Standard Deviation (S.D.), Coefficient of Variation (C.V.), Least Significant Different (LSD) test group (LSD). LSD groups are limited within year and trait
Trait	Year	Crop type	n	Mean ± S.D.	C.V.	Overall mean	C.V.	LSD group
Leaf Area (RS)	2018	White	123	521.32 ± 107.98	0.2	510.93 ± 109.66	0.21	a
		Red	27	499.83 ± 92.68	0.18			ab
		Savoy	24	446.01 ± 102.46	0.22			b
		Pointed	7	593.75 ± 136.49	0.22			a
	2019	White	151	717.20 ± 210.27	0.29	716.99 ± 201.27	0.28	a
		Red	43	697.75 ± 141.48	0.2			a
		Savoy	39	735.52 ± 222.38	0.3			a
		Pointed	11	723.74 ± 215.01	0.29			a
Leaf Lenght (RS)	2018	White	123	32.43 ± 4.09	0.12	32.30 ± 4.50	0.13	b
		Red	27	34.95 ± 4.09	0.11			a
		Savoy	24	28.63 ± 4.64	0.16			b
		Pointed	7	32.48 ± 5.22	0.16			ab
	2019	White	151	36.94 ± 7.09	0.19	37.95 ± 7.20	0.18	b
		Red	43	42.04 ± 5.42	0.12			a
		Savoy	39	38.07 ± 7.73	0.2			ab
		Pointed	11	35.44 ± 7.88	0.22			b
Leaf Width (RS)	2018	White	123	25.41 ± 3.39	0.13	25.17 ± 3.24	0.12	a
		Red	27	24.69 ± 2.47	0.1			a
		Savoy	24	23.96 ± 2.76	0.11			a
		Pointed	7	26.90 ± 3.71	0.13			a
	2019	White	151	30.51 ± 5.50	0.17	30.32 ± 4.83	0.15	a
		Red	43	29.45 ± 3.40	0.11			a
		Savoy	39	30.65 ± 4.74	0.15			a
		Pointed	11	29.97 ± 4.78	0.15			a
Leaf Ratio (RS)	2018	White	123	1.29 ± 0.22	0.17	1.29 ± 0.21	0.16	b
		Red	27	1.42 ± 0.17	0.11			a
		Savoy	24	1.21 ± 0.17	0.14			b
		Pointed	7	1.21 ± 0.20	0.17			b
	2019	White	151	1.23 ± 0.20	0.16	1.26 ± 0.21	0.16	b
		Red	43	1.43 ± 0.19	0.13			a
		Savoy	39	1.24 ± 0.15	0.12			b
		Pointed	11	1.19 ± 0.20	0.17			b
Leaf Number (HS)	2019	White	133	30.82 ± 7.33	0.23	31.18 ± 8.07	0.25	b
		Red	42	28.46 ± 5.03	0.17			bc
		Savoy	34	38.10 ± 9.95	0.26			a
		Pointed	9	23.15 ± 5.28	0.22			c
Head Weight	2019	White	133	1.60 ± 0.70	0.44	1.34 ± 0.74	0.55	a
		Red	42	0.83 ± 0.62	0.74			b
		Savoy	34	0.87 ± 0.49	0.56			b
		Pointed	9	1.62 ± 0.53	0.32			a

## Sheet: Suppl. S7
Supplementary Table S7 All significant SNPs-trait associations from all GWAS conducted utilizing the JWS v1 reference genome
P.S. correction =	K = Kinship; PCO = Principal Coordinates Analysis.
SNP =	SNP name
Chr =	chromosome on which the SNP is located
position =	position of the SNP on the chromosome
allFreq =	allele frequency of the SNP
pValue =	P-value for the SNP
effect =	effect of the SNP on the trait value
effectSE =	standard error of the effect of the SNP on the trait value
RLR2 =	likelihood-ratio-based R2 as defined in Sun et al. (2010)
LOD =	LOD score for the SNP, defined as −log10(pValue)
propSnpVar =	proportion of the variance explained by the SNP
Trial	Population structure correction	Trait name	SNP	Chr	Position (bp)	allFreq	pValue	effect	effectSE	RLR2	LOD	propSnpVar
2018	K	Second_LeafArea	C00_244859	C00	244859	0.0685714	0.000866505	-68.9511	20.9452	0.060048	3.06223	0.0534697
2018	K	Second_LeafLength	C00_244859	C00	244859	0.0685714	0.000306731	-2.72286	0.765326	0.0697765	3.51324	0.0538068
2017	K	LeafLength	C00_1585989	C00	1585989	0.105903	0.000834851	-3.07179	0.926003	0.0374881	3.07839	0.0197287
2017	K + PCO	LeafLength	C00_1585989	C00	1585989	0.105903	0.000565503	-3.23512	0.946068	0.0397884	3.24757	0.0218825
2019	K	Head_Height	C00_2759838	C00	2759838	0.0930233	0.000733599	1.41848	0.424235	0.0506705	3.13454	0.129997
2019	K	Head_Area	C00_2759838	C00	2759838	0.0930233	0.000663577	35.8239	10.6299	0.0514556	3.17811	0.128353
2017	K	HeadHeight	C00_2759861	C00	2759861	0.178862	0.000741632	1.06318	0.317851	0.0444624	3.12981	0.0872532
2017	K + PCO	HeadHeight	C00_2759861	C00	2759861	0.178862	0.000553948	1.04939	0.306858	0.0464284	3.25653	0.0850049
2017	K + PCO	HeadArea	C00_2759861	C00	2759861	0.178862	0.000546463	27.4407	8.01578	0.0465222	3.26244	0.0858185
2019	K + PCO	Head_Area	C00_2759878	C00	2759878	0.0883721	0.000944412	37.4095	11.4273	0.0486245	3.02484	0.141815
2019	K	Head_Area	C00_2759878	C00	2759878	0.0883721	0.000444672	38.6246	11.1186	0.0545828	3.35196	0.151178
2019	K + PCO	Head_Weight	C00_2759878	C00	2759878	0.0883721	0.000370673	0.361089	0.102669	0.0559085	3.43101	0.164448
2019	K	Head_Weight	C00_2759878	C00	2759878	0.0883721	0.000338048	0.359558	0.101479	0.0567188	3.47102	0.163057
2019	K + PCO	First_LeafRatio	C00_2764389	C00	2764389	0.0892116	0.000976747	0.0824467	0.0252258	0.043356	3.01022	0.0248828
2019	K	Second_LeafRatio	C00_2764389	C00	2764389	0.0884774	0.000778113	0.0830542	0.0249283	0.044653	3.10896	0.0273719
2019	K	First_LeafRatio	C00_2764389	C00	2764389	0.0892116	0.000259775	0.0909066	0.0251594	0.0527308	3.5854	0.0302513
2019	K	First_LeafArea	C00_2764447	C00	2764447	0.0788382	0.000626883	98.6967	29.1244	0.0465339	3.20281	0.176308
2019	K + PCO	Head_Weight	C00_2764447	C00	2764447	0.0837209	0.000394582	0.384111	0.109706	0.0554234	3.40386	0.195855
2019	K	Head_Weight	C00_2764447	C00	2764447	0.0837209	0.000378049	0.379609	0.107995	0.0558481	3.42245	0.191292
2019	K + PCO	First_LeafRatio	C00_2764454	C00	2764454	0.0892116	0.000976747	0.0824467	0.0252258	0.043356	3.01022	0.110205
2019	K	Second_LeafRatio	C00_2764454	C00	2764454	0.0884774	0.000778113	0.0830542	0.0249283	0.044653	3.10896	0.119158
2019	K	First_LeafRatio	C00_2764454	C00	2764454	0.0892116	0.000259775	0.0909066	0.0251594	0.0527308	3.5854	0.133982
2019	K	First_LeafLength	C00_2897465	C00	2897465	0.0954357	0.000222284	2.92398	0.800758	0.0538233	3.65309	0.0121304
2019	K + PCO	First_LeafLength	C00_2897465	C00	2897465	0.0954357	0.000201522	2.97584	0.810275	0.0544301	3.69568	0.0125645
2018	K	Second_LeafRatio	C00_4592767	C00	4592767	0.0571429	0.000735643	0.105114	0.0315156	0.0615892	3.13333	0.0441317
2018	K	First_LeafRatio	C00_4592767	C00	4592767	0.0571429	0.000608338	0.0957314	0.0282819	0.0633746	3.21586	0.0436614
2018	K + PCO	First_LeafRatio	C00_4592767	C00	4592767	0.0571429	0.000462367	0.093452	0.0270807	0.0657851	3.33501	0.041607
2018	K + PCO	HeadArea	C00_4790980	C00	4790980	0.426752	0.0009388	-49.0103	15.0257	0.0655199	3.02743	0.0191181
2018	K	HeadArea	C00_4790980	C00	4790980	0.426752	0.000829673	-47.7531	14.4749	0.0669738	3.08109	0.0181498
2018	K + PCO	HeadHeight	C00_7103916	C00	7103916	0.283439	0.000861692	-1.72117	0.524039	0.0664026	3.06465	0.014436
2018	K + PCO	HeadHeight	C00_7103919	C00	7103919	0.302548	0.000581829	-1.70451	0.503358	0.070434	3.2352	0.0170358
2018	K + PCO	HeadHeight	C00_7103933	C00	7103933	0.242038	0.000890891	-1.7867	0.545453	0.0660595	3.05018	0.0909386
2019	K	Second_LeafLength	C00_8177175	C00	8177175	0.0329218	0.000905139	4.02588	1.22329	0.043593	3.04328	0.07578
2018	K	HeadWidth	C00_8219168	C00	8219168	0.0382166	0.000666394	-5.54331	1.65157	0.0692402	3.17627	0.38096
2018	K + PCO	HeadWidth	C00_8219168	C00	8219168	0.0382166	0.000272822	-6.09714	1.70592	0.078142	3.56412	0.460885
2018	K	HeadArea	C00_8219168	C00	8219168	0.0382166	0.000124857	-147.741	39.2417	0.0863277	3.90359	0.460622
2018	K	HeadHeight	C00_8219168	C00	8219168	0.0382166	0.000106846	-4.84909	1.2759	0.0878944	3.97124	0.47568
2018	K + PCO	HeadArea	C00_8219168	C00	8219168	0.0382166	2.95527e-05	-161.243	39.6053	0.100192	4.5294	0.548663
2018	K + PCO	HeadHeight	C00_8219168	C00	8219168	0.0382166	2.73267e-05	-5.28193	1.2922	0.100953	4.56341	0.56439
2018	K	HeadWidth	C00_8240658	C00	8240658	0.0382166	0.000666394	-5.54331	1.65157	0.0692402	3.17627	0.122551
2018	K + PCO	HeadWidth	C00_8240658	C00	8240658	0.0382166	0.000272822	-6.09714	1.70592	0.078142	3.56412	0.148263
2018	K	HeadArea	C00_8240658	C00	8240658	0.0382166	0.000124857	-147.741	39.2417	0.0863277	3.90359	0.148178
2018	K	HeadHeight	C00_8240658	C00	8240658	0.0382166	0.000106846	-4.84909	1.2759	0.0878944	3.97124	0.153022
2018	K + PCO	HeadArea	C00_8240658	C00	8240658	0.0382166	2.95527e-05	-161.243	39.6053	0.100192	4.5294	0.1765
2018	K + PCO	HeadHeight	C00_8240658	C00	8240658	0.0382166	2.73267e-05	-5.28193	1.2922	0.100953	4.56341	0.181559
2018	K	HeadWidth	C00_8240728	C00	8240728	0.0382166	0.000666394	-5.54331	1.65157	0.0692402	3.17627	0.122551
2018	K + PCO	HeadWidth	C00_8240728	C00	8240728	0.0382166	0.000272822	-6.09714	1.70592	0.078142	3.56412	0.148263
2018	K	HeadArea	C00_8240728	C00	8240728	0.0382166	0.000124857	-147.741	39.2417	0.0863277	3.90359	0.148178
2018	K	HeadHeight	C00_8240728	C00	8240728	0.0382166	0.000106846	-4.84909	1.2759	0.0878944	3.97124	0.153022
2018	K + PCO	HeadArea	C00_8240728	C00	8240728	0.0382166	2.95527e-05	-161.243	39.6053	0.100192	4.5294	0.1765
2018	K + PCO	HeadHeight	C00_8240728	C00	8240728	0.0382166	2.73267e-05	-5.28193	1.2922	0.100953	4.56341	0.181559
2019	K + PCO	Leaf_Number	C00_9017426	C00	9017426	0.327907	0.000129345	2.29362	0.608065	0.0640348	3.88825	0.0367482
2019	K	Leaf_Number	C00_9017426	C00	9017426	0.327907	5.56332e-05	2.41342	0.608116	0.0706389	4.25467	0.0406872
2019	K + PCO	Leaf_Number	C00_9017456	C00	9017456	0.318605	0.000293599	2.31903	0.648663	0.0577151	3.53225	0.0334119
2019	K	Leaf_Number	C00_9017456	C00	9017456	0.318605	0.000124898	2.4486	0.647079	0.064432	3.90344	0.03725
2019	K + PCO	Leaf_Number	C00_9017459	C00	9017459	0.316279	0.000160703	2.45859	0.66075	0.0623665	3.79398	0.00561104
2019	K	Leaf_Number	C00_9017459	C00	9017459	0.316279	6.63627e-05	2.5873	0.658479	0.0692901	4.17808	0.00621391
2019	K + PCO	Leaf_Number	C00_9017471	C00	9017471	0.316279	0.000160703	2.45859	0.66075	0.0623665	3.79398	0.00561104
2019	K	Leaf_Number	C00_9017471	C00	9017471	0.316279	6.63627e-05	2.5873	0.658479	0.0692901	4.17808	0.00621391
2019	K + PCO	Second_LeafRatio	C00_9650048	C00	9650048	0.0288066	0.000786646	0.11969	0.0359764	0.0445271	3.10422	0.257819
2019	K	Second_LeafRatio	C00_9650048	C00	9650048	0.0288066	0.000419169	0.12671	0.0362714	0.048981	3.37761	0.288947
2019	K + PCO	Second_LeafRatio	C00_9650049	C00	9650049	0.0288066	0.000786646	0.11969	0.0359764	0.0445271	3.10422	0.253913
2019	K	Second_LeafRatio	C00_9650049	C00	9650049	0.0288066	0.000419169	0.12671	0.0362714	0.048981	3.37761	0.284569
2019	K + PCO	Second_LeafRatio	C00_9650051	C00	9650051	0.0288066	0.000786646	0.11969	0.0359764	0.0445271	3.10422	0.056542
2019	K	Second_LeafRatio	C00_9650051	C00	9650051	0.0288066	0.000419169	0.12671	0.0362714	0.048981	3.37761	0.0633686
2019	K + PCO	Second_LeafRatio	C00_9650062	C00	9650062	0.0288066	0.000786646	0.11969	0.0359764	0.0445271	3.10422	0.259702
2019	K	Second_LeafRatio	C00_9650062	C00	9650062	0.0288066	0.000419169	0.12671	0.0362714	0.048981	3.37761	0.291058
2019	K	Head_Width	C00_10021278	C00	10021278	0.0906977	0.000379177	-1.94889	0.55456	0.0558249	3.42116	0.100367
2019	K + PCO	Head_Width	C00_10021278	C00	10021278	0.0906977	0.000227634	-2.04199	0.561387	0.0596826	3.64276	0.110184
2019	K	Head_Height	C00_10021278	C00	10021278	0.0906977	0.000167885	-1.63814	0.44105	0.0621486	3.77499	0.143462
2019	K	Head_Diameter	C00_10021278	C00	10021278	0.0906977	0.000103497	-1.76182	0.460267	0.0658795	3.98507	0.115405
2019	K	Head_Area	C00_10021278	C00	10021278	0.0906977	9.7175e-05	-43.1192	11.222	0.0663642	4.01245	0.153868
2019	K + PCO	Head_Height	C00_10021278	C00	10021278	0.0906977	8.6858e-05	-1.73542	0.449136	0.0670847	4.06119	0.161006
2019	K + PCO	Head_Area	C00_10021278	C00	10021278	0.0906977	6.42388e-05	-45.3437	11.5319	0.0693858	4.1922	0.170154
2019	K + PCO	Head_Diameter	C00_10021278	C00	10021278	0.0906977	5.60665e-05	-1.8342	0.46291	0.0704211	4.2513	0.125082
2018	K	HeadHeight	C00_10075622	C00	10075622	0.229299	0.000361608	2.44496	0.696307	0.075527	3.44176	0.0473913
2018	K + PCO	HeadHeight	C00_10075622	C00	10075622	0.229299	0.000183617	2.6399	0.719673	0.0821346	3.73609	0.0552494
2017	K	HeadArea	C00_10218641	C00	10218641	0.0162602	0.000483643	86.3758	24.9853	0.0474211	3.31548	0.816222
2017	K	HeadArea	C00_10218642	C00	10218642	0.0162602	0.000483643	86.3758	24.9853	0.0474211	3.31548	0.225017
2017	K	HeadArea	C00_10222543	C00	10222543	0.0162602	0.000483643	86.3758	24.9853	0.0474211	3.31548	0.419877
2017	K	HeadHeight	C00_10222567	C00	10222567	0.050813	0.000200839	1.73606	0.472131	0.0534795	3.69715	0.0712139
2017	K	HeadArea	C00_10222645	C00	10222645	0.0162602	0.000483643	86.3758	24.9853	0.0474211	3.31548	0.245293
2019	K	Head_Ratio	C00_10777311	C00	10777311	0.0744186	0.00086267	0.106911	0.0323934	0.049401	3.06416	0.0296144
2019	K	Head_Ratio	C00_10777314	C00	10777314	0.0744186	0.00086267	0.106911	0.0323934	0.049401	3.06416	0.0323469
2018	K + PCO	HeadHeight	C00_11184147	C00	11184147	0.0987261	0.000323857	2.98936	0.846244	0.0764048	3.48965	0.0476943
2018	K + PCO	HeadHeight	C00_11184220	C00	11184220	0.0859873	0.000372113	3.13321	0.895606	0.0749942	3.42932	0.0303285
2018	K + PCO	HeadArea	C00_11184220	C00	11184220	0.0859873	0.000196468	100.097	27.4065	0.0814544	3.70671	0.0322893
2018	K	First_LeafLength	C00_11834505	C00	11834505	0.168571	0.000348777	1.66241	0.471471	0.0685795	3.45745	0.074347
2018	K	HeadArea	C00_12402417	C00	12402417	0.0477707	0.000374461	-114.56	32.7066	0.0751693	3.42659	0.134993
2018	K	HeadHeight	C00_12402417	C00	12402417	0.0477707	0.00033875	-3.75117	1.06342	0.0761954	3.47012	0.138749
2018	K + PCO	HeadArea	C00_12402417	C00	12402417	0.0477707	8.53237e-05	-130.365	33.9214	0.0897849	4.06893	0.174808
2018	K + PCO	HeadHeight	C00_12402417	C00	12402417	0.0477707	4.46676e-05	-4.4141	1.10791	0.0961626	4.35001	0.192123
2018	K + PCO	First_LeafRatio	C00_12621115	C00	12621115	0.325714	0.000509304	-0.142746	0.0416609	0.0648851	3.29302	0.243548
2018	K + PCO	First_LeafArea	C00_12694874	C00	12694874	0.308571	0.000718793	-47.0472	14.0963	0.0616693	3.1434	0.131824
2018	K + PCO	First_LeafArea	C00_12694895	C00	12694895	0.305714	0.000879751	-46.0732	14.0282	0.0597773	3.05564	0.0172224
2019	K	Head_Height	C00_12695026	C00	12695026	0.283721	0.000729026	-1.22963	0.367572	0.0507194	3.13726	0.0152343
2019	K + PCO	Head_Height	C00_12695026	C00	12695026	0.283721	0.000573277	-1.2764	0.374783	0.0525191	3.24164	0.0164153
2019	K	Head_Area	C00_12695026	C00	12695026	0.283721	0.000508089	-32.4393	9.43098	0.0535424	3.29406	0.0164131
2019	K + PCO	Head_Area	C00_12695026	C00	12695026	0.283721	0.000231721	-35.1993	9.68858	0.0595452	3.63503	0.0193247
2017	K + PCO	LeafArea	C00_13522751	C00	13522751	0.246528	0.000410203	85.4412	24.3929	0.0417058	3.387	0.0161246
2017	K + PCO	LeafWidth	C00_13522751	C00	13522751	0.246528	0.00038646	1.76725	0.502353	0.0420616	3.4129	0.0166412
2017	K	LeafArea	C00_13522751	C00	13522751	0.246528	0.000356576	85.6475	24.1938	0.0425809	3.44785	0.0162025
2017	K	LeafWidth	C00_13522751	C00	13522751	0.246528	0.000250383	1.811	0.499066	0.0446926	3.6014	0.0174753
2018	K + PCO	HeadArea	C00_13588477	C00	13588477	0.0477707	0.000212314	102.468	28.197	0.0806735	3.67302	0.0622875
2018	K	HeadArea	C00_13588477	C00	13588477	0.0477707	0.000124853	104.916	27.8669	0.0863279	3.9036	0.0653001
2018	K + PCO	HeadHeight	C00_13588477	C00	13588477	0.0477707	2.6606e-05	3.72951	0.911177	0.101212	4.57502	0.0791012
2018	K	HeadHeight	C00_13588477	C00	13588477	0.0477707	2.33672e-05	3.7423	0.906063	0.102963	4.63139	0.0796448
2018	K + PCO	HeadArea	C00_13588504	C00	13588504	0.0477707	0.000212314	102.468	28.197	0.0806735	3.67302	0.115054
2018	K	HeadArea	C00_13588504	C00	13588504	0.0477707	0.000124853	104.916	27.8669	0.0863279	3.9036	0.120618
2018	K + PCO	HeadHeight	C00_13588504	C00	13588504	0.0477707	2.6606e-05	3.72951	0.911177	0.101212	4.57502	0.146111
2018	K	HeadHeight	C00_13588504	C00	13588504	0.0477707	2.33672e-05	3.7423	0.906063	0.102963	4.63139	0.147115
2018	K + PCO	HeadArea	C00_13588505	C00	13588505	0.0509554	5.92558e-05	101.622	25.9021	0.0933872	4.22727	0.0612632
2018	K	HeadArea	C00_13588505	C00	13588505	0.0509554	3.58394e-05	103.624	25.646	0.0987639	4.44564	0.0637017
2018	K + PCO	HeadHeight	C00_13588505	C00	13588505	0.0509554	8.7888e-06	3.61278	0.837244	0.111835	5.05607	0.0742272
2018	K	HeadHeight	C00_13588505	C00	13588505	0.0509554	8.58963e-06	3.61216	0.833854	0.112657	5.06603	0.0742016
2018	K + PCO	HeadArea	C00_13588520	C00	13588520	0.0477707	0.000212314	102.468	28.197	0.0806735	3.67302	0.0622875
2018	K	HeadArea	C00_13588520	C00	13588520	0.0477707	0.000124853	104.916	27.8669	0.0863279	3.9036	0.0653001
2018	K + PCO	HeadHeight	C00_13588520	C00	13588520	0.0477707	2.6606e-05	3.72951	0.911177	0.101212	4.57502	0.0791012
2018	K	HeadHeight	C00_13588520	C00	13588520	0.0477707	2.33672e-05	3.7423	0.906063	0.102963	4.63139	0.0796448
2018	K + PCO	HeadArea	C00_13588526	C00	13588526	0.0414013	0.000127803	113.474	30.2434	0.0857647	3.89346	0.401431
2018	K	HeadArea	C00_13588526	C00	13588526	0.0414013	9.37341e-05	115.21	30.0795	0.0892081	4.0281	0.413803
2018	K + PCO	HeadHeight	C00_13588526	C00	13588526	0.0414013	8.44046e-05	3.7814	0.983321	0.0898922	4.07363	0.42734
2018	K	HeadHeight	C00_13588526	C00	13588526	0.0414013	8.3591e-05	3.77109	0.978004	0.0903548	4.07784	0.425013
2018	K	HeadHeight	C00_13588637	C00	13588637	0.0350318	0.000193185	4.586	1.25195	0.0819163	3.71403	0.0843498
2018	K	HeadArea	C00_13588637	C00	13588637	0.0350318	0.000145831	143.586	38.5049	0.0847619	3.83615	0.0862555
2018	K + PCO	HeadArea	C00_13588637	C00	13588637	0.0350318	0.000131199	145.446	38.8266	0.0855028	3.88207	0.0885046
2018	K + PCO	HeadHeight	C00_13588637	C00	13588637	0.0350318	0.000103273	4.80692	1.26485	0.0878888	3.98601	0.0926721
2018	K	HeadHeight	C00_13588680	C00	13588680	0.0350318	0.000193185	4.586	1.25195	0.0819163	3.71403	0.0599481
2018	K	HeadArea	C00_13588680	C00	13588680	0.0350318	0.000145831	143.586	38.5049	0.0847619	3.83615	0.0613025
2018	K + PCO	HeadArea	C00_13588680	C00	13588680	0.0350318	0.000131199	145.446	38.8266	0.0855028	3.88207	0.0629009
2018	K + PCO	HeadHeight	C00_13588680	C00	13588680	0.0350318	0.000103273	4.80692	1.26485	0.0878888	3.98601	0.0658628
2017	K	HeadArea	C00_14830667	C00	14830667	0.0182927	7.44021e-06	100.789	22.8891	0.0757934	5.12841	1.1457
2017	K	HeadArea	C00_14830684	C00	14830684	0.0182927	7.44021e-06	100.789	22.8891	0.0757934	5.12841	0.885609
2019	K + PCO	Head_Area	C00_14846862	C00	14846862	0.0511628	0.000605529	45.9823	13.5581	0.0520928	3.21786	0.0170201
2019	K + PCO	Head_Area	C00_14846863	C00	14846863	0.0511628	0.000605529	45.9823	13.5581	0.0520928	3.21786	0.0129537
2018	K + PCO	Second_LeafRatio	C00_15560167	C00	15560167	0.0228571	0.000693227	0.195703	0.058471	0.062008	3.15912	0.370289
2018	K + PCO	First_LeafRatio	C00_15560167	C00	15560167	0.0228571	0.00037029	0.184598	0.0526448	0.0678481	3.43146	0.392975
2018	K	Second_LeafRatio	C00_15560167	C00	15560167	0.0228571	3.25345e-05	0.245204	0.0602369	0.090343	4.48766	0.581305
2018	K	First_LeafRatio	C00_15560167	C00	15560167	0.0228571	2.1799e-05	0.224602	0.0540561	0.0939406	4.66156	0.581752
2018	K	First_LeafRatio	C00_15560598	C00	15560598	0.0914286	0.000490855	0.0929096	0.0270083	0.0653862	3.30905	0.0547466
2019	K	Head_Diameter	C00_16858259	C00	16858259	0.239535	0.000561222	1.42154	0.416395	0.0527655	3.25087	0.0523791
2018	K + PCO	HeadHeight	C00_17161440	C00	17161440	0.0286624	0.000115856	-4.10279	1.08701	0.0867439	3.93608	0.511522
2017	K	LeafWidth	C00_17417480	C00	17417480	0.0243056	0.000951313	-5.15356	1.57036	0.0367053	3.02168	0.0390332
2017	K	LeafArea	C00_17417480	C00	17417480	0.0243056	0.000849399	-255.245	77.0534	0.0373846	3.07089	0.0396918
2017	K + PCO	LeafArea	C00_17417480	C00	17417480	0.0243056	0.000524317	-264.719	76.9688	0.0402402	3.28041	0.0426928
2017	K + PCO	LeafWidth	C00_17417480	C00	17417480	0.0243056	0.000478427	-5.4155	1.56377	0.0407873	3.32018	0.043102
2017	K + PCO	HeadRatio	C00_18381134	C00	18381134	0.152439	0.00068318	-0.0509317	0.0151366	0.0449809	3.16546	0.0122722
2017	K	HeadRatio	C00_18381134	C00	18381134	0.152439	0.000630128	-0.0521137	0.0153815	0.0455908	3.20057	0.0128484
2018	K + PCO	HeadRatio	C00_18381134	C00	18381134	0.152866	0.000464362	-0.0658331	0.0191189	0.0727386	3.33314	0.0331493
2018	K	HeadRatio	C00_18381134	C00	18381134	0.152866	0.000283636	-0.06412	0.0179561	0.0780095	3.54724	0.0314465
2018	K + PCO	First_LeafLength	C00_18407075	C00	18407075	0.0314286	0.000905872	-3.58808	1.09508	0.0595029	3.04293	0.127118
2018	K	First_LeafLength	C00_18407075	C00	18407075	0.0314286	0.000774171	-3.59123	1.08109	0.061109	3.11116	0.127342
2018	K + PCO	First_LeafLength	C00_18407085	C00	18407085	0.0314286	0.000905872	-3.58808	1.09508	0.0595029	3.04293	0.107282
2018	K	First_LeafLength	C00_18407085	C00	18407085	0.0314286	0.000774171	-3.59123	1.08109	0.061109	3.11116	0.10747
2018	K + PCO	First_LeafLength	C00_18407100	C00	18407100	0.0314286	0.000905872	-3.58808	1.09508	0.0595029	3.04293	0.0974656
2018	K	First_LeafLength	C00_18407100	C00	18407100	0.0314286	0.000774171	-3.59123	1.08109	0.061109	3.11116	0.0976371
2018	K	Second_LeafArea	C00_19078204	C00	19078204	0.0542857	0.000870955	-94.0798	28.5903	0.0599998	3.06	0.083052
2018	K	Second_LeafArea	C00_19078235	C00	19078235	0.0514286	0.000754055	-98.2595	29.5179	0.0613567	3.1226	0.0369639
2018	K	Second_LeafArea	C00_19078238	C00	19078238	0.0514286	0.000754055	-98.2595	29.5179	0.0613567	3.1226	0.0340914
2018	K + PCO	Second_LeafArea	C00_19078243	C00	19078243	0.0628571	0.000799705	-88.0153	26.5943	0.060671	3.09707	0.0449422
2018	K	Second_LeafArea	C00_19078243	C00	19078243	0.0628571	0.000426061	-92.4302	26.5916	0.0667107	3.37053	0.049564
2017	K	LeafRatio	C00_19804830	C00	19804830	0.163194	0.000505958	-0.0758567	0.0219868	0.0404879	3.29589	0.0165412
2017	K + PCO	LeafRatio	C00_19804830	C00	19804830	0.163194	0.000207326	-0.0810602	0.0220671	0.0457718	3.68335	0.0188883
2017	K	LeafRatio	C00_19804850	C00	19804850	0.163194	0.000505958	-0.0758567	0.0219868	0.0404879	3.29589	0.0420842
2017	K + PCO	LeafRatio	C00_19804850	C00	19804850	0.163194	0.000207326	-0.0810602	0.0220671	0.0457718	3.68335	0.0480559
2018	K + PCO	HeadRatio	C00_19867852	C00	19867852	0.420382	0.000885371	-0.0469254	0.0143184	0.0661235	3.05287	0.0727165
2018	K	HeadRatio	C00_19867852	C00	19867852	0.420382	0.000665463	-0.045818	0.0136495	0.0692546	3.17688	0.0693249
2019	K	Leaf_Number	C00_19867852	C00	19867852	0.402326	0.0004921	2.0572	0.596654	0.053792	3.30795	0.045888
2019	K + PCO	Second_LeafRatio	C00_20119380	C00	20119380	0.0761317	0.000833409	-0.0787995	0.023796	0.0441234	3.07914	0.108403
2019	K + PCO	Second_LeafRatio	C00_21270506	C00	21270506	0.390947	0.000425217	0.0475928	0.0136468	0.0488194	3.37139	0.00451065
2019	K + PCO	Second_LeafRatio	C00_21270548	C00	21270548	0.395062	0.000340233	0.0486501	0.0137279	0.0503711	3.46822	0.00450653
2017	K	HeadArea	C00_23075282	C00	23075282	0.115854	0.000747141	28.027	8.38397	0.0444112	3.1266	0.0106925
2019	K	Second_LeafLength	C00_23544547	C00	23544547	0.228395	0.000708079	-1.923	0.572857	0.0453138	3.14992	0.00443341
2019	K + PCO	Second_LeafLength	C00_23544547	C00	23544547	0.228395	0.000522275	-1.99882	0.581961	0.0473867	3.2821	0.0047899
2019	K	Head_Width	C00_25345402	C00	25345402	0.144186	0.000427155	1.74842	0.501827	0.0548963	3.36941	0.0291072
2019	K + PCO	Head_Width	C00_25345402	C00	25345402	0.144186	8.77091e-05	2.01935	0.52292	0.0670101	4.05696	0.0388269
2019	K + PCO	Head_Width	C00_26290098	C00	26290098	0.0581395	0.000316033	3.19505	0.898281	0.0571449	3.50027	0.0462085
2018	K + PCO	First_LeafRatio	C00_27720407	C00	27720407	0.0485714	0.000717606	-0.114669	0.0343527	0.0616848	3.14411	0.0784996
2018	K + PCO	Second_LeafRatio	C00_27720407	C00	27720407	0.0485714	4.94104e-05	-0.151599	0.0381545	0.0862625	4.30618	0.11503
2019	K + PCO	Second_LeafRatio	C00_29220185	C00	29220185	0.026749	0.000141	0.115836	0.0308197	0.0564752	3.85078	0.139068
2019	K	Second_LeafRatio	C00_29220185	C00	29220185	0.026749	9.34906e-05	0.118906	0.0308233	0.0594035	4.02923	0.146538
2019	K + PCO	Second_LeafRatio	C00_29220193	C00	29220193	0.026749	0.000141	0.115836	0.0308197	0.0564752	3.85078	0.160617
2019	K	Second_LeafRatio	C00_29220193	C00	29220193	0.026749	9.34906e-05	0.118906	0.0308233	0.0594035	4.02923	0.169245
2019	K + PCO	Second_LeafRatio	C00_29220250	C00	29220250	0.0288066	0.000653022	0.0997713	0.0295505	0.0458277	3.18507	0.051577
2019	K	Second_LeafRatio	C00_29220250	C00	29220250	0.0288066	0.000471963	0.102347	0.0295547	0.0481522	3.32609	0.0542743
2019	K + PCO	First_LeafRatio	C00_29221938	C00	29221938	0.0311203	0.000676451	0.109278	0.0324583	0.0459434	3.16976	0.0910741
2019	K	First_LeafRatio	C00_29221938	C00	29221938	0.0311203	0.000551282	0.111956	0.0327123	0.04744	3.25863	0.0955928
2019	K + PCO	Second_LeafRatio	C00_29221938	C00	29221938	0.0308642	6.59299e-05	0.124664	0.0316883	0.0617054	4.18092	0.126193
2019	K	Second_LeafRatio	C00_29221938	C00	29221938	0.0308642	4.22126e-05	0.13015	0.0322378	0.0648731	4.37456	0.137542
2019	K + PCO	First_LeafRatio	C00_29221982	C00	29221982	0.0290456	0.00069426	0.113147	0.0336761	0.0457606	3.15848	0.035949
2019	K	First_LeafRatio	C00_29221982	C00	29221982	0.0290456	0.000612095	0.115591	0.0340468	0.0467022	3.21318	0.0375193
2019	K + PCO	Second_LeafRatio	C00_29221982	C00	29221982	0.0288066	3.05669e-05	0.135104	0.0329227	0.0669544	4.51475	0.0544569
2019	K	Second_LeafRatio	C00_29221982	C00	29221982	0.0288066	2.21504e-05	0.140266	0.0335819	0.0692776	4.65462	0.0586977
2019	K + PCO	First_LeafRatio	C00_29221989	C00	29221989	0.0290456	0.00069426	0.113147	0.0336761	0.0457606	3.15848	0.188149
2019	K	First_LeafRatio	C00_29221989	C00	29221989	0.0290456	0.000612095	0.115591	0.0340468	0.0467022	3.21318	0.196368
2019	K + PCO	Second_LeafRatio	C00_29221989	C00	29221989	0.0288066	3.05669e-05	0.135104	0.0329227	0.0669544	4.51475	0.287441
2019	K	Second_LeafRatio	C00_29221989	C00	29221989	0.0288066	2.21504e-05	0.140266	0.0335819	0.0692776	4.65462	0.309826
2018	K	HeadRatio	C00_34059425	C00	34059425	0.133758	0.000393145	0.0866108	0.0248129	0.0746703	3.40545	0.0512367
2018	K	HeadRatio	C00_34059455	C00	34059455	0.133758	0.000393145	0.0866108	0.0248129	0.0746703	3.40545	0.134547
2018	K	HeadRatio	C00_34059484	C00	34059484	0.133758	0.000393145	0.0866108	0.0248129	0.0746703	3.40545	0.230881
2017	K	LeafRatio	C00_34719618	C00	34719618	0.0260417	0.000559338	0.25826	0.075429	0.0398875	3.25233	0.45284
2019	K	Second_LeafWidth	C00_35189961	C00	35189961	0.0329218	0.000744694	3.46308	1.03578	0.0449606	3.12802	0.0396816
2019	K + PCO	Second_LeafWidth	C00_35189961	C00	35189961	0.0329218	0.000698488	3.54546	1.05566	0.0453576	3.15584	0.0415919
2019	K + PCO	Second_LeafLength	C00_35189961	C00	35189961	0.0329218	8.9785e-05	4.73976	1.22673	0.0595851	4.0468	0.0284526
2019	K	Second_LeafLength	C00_35189961	C00	35189961	0.0329218	8.48108e-05	4.69481	1.20996	0.060076	4.07155	0.0279153
2019	K	Second_LeafArea	C00_35189961	C00	35189961	0.0329218	1.78266e-05	215.14	50.9474	0.0707543	4.74893	0.0692405
2019	K + PCO	Second_LeafArea	C00_35189961	C00	35189961	0.0329218	1.61819e-05	219.815	51.8605	0.0712652	4.79097	0.0722824
2019	K	First_LeafRatio	C00_36266175	C00	36266175	0.238589	0.000489607	0.0527871	0.0152863	0.0482759	3.31015	0.0386216
2019	K + PCO	First_LeafRatio	C00_36266175	C00	36266175	0.238589	0.000345641	0.0541198	0.0152898	0.0506582	3.46138	0.0405964
2018	K	Second_LeafArea	C00_40103647	C00	40103647	0.368571	0.000454613	-40.599	11.7354	0.0661041	3.34236	0.0332168
2017	K + PCO	HeadWidth	C00_40264530	C00	40264530	0.0264228	0.000979671	2.44577	0.748362	0.042489	3.00892	0.0891682
2017	K + PCO	HeadArea	C00_40264530	C00	40264530	0.0264228	2.36508e-05	74.4205	17.8915	0.067916	4.62616	0.168231
2017	K	HeadArea	C00_40264530	C00	40264530	0.0264228	2.27383e-05	76.4701	18.3291	0.068311	4.64324	0.177625
2019	K + PCO	Head_Weight	C00_42044483	C00	42044483	0.0418605	0.000843546	-0.52609	0.159227	0.0495069	3.07389	0.0956639
2019	K + PCO	Head_Height	C00_42044483	C00	42044483	0.0418605	0.000492649	-2.28158	0.662322	0.0536987	3.30746	0.093387
2019	K	Head_Height	C00_42044483	C00	42044483	0.0418605	0.000410652	-2.27683	0.651617	0.0552035	3.38653	0.0929989
2019	K	Head_Weight	C00_42044483	C00	42044483	0.0418605	0.000294162	-0.558707	0.156159	0.0578004	3.53141	0.107894
2019	K + PCO	Head_Width	C00_42044483	C00	42044483	0.0418605	0.000217853	-3.01917	0.827614	0.0600217	3.66184	0.0808296
2019	K	Head_Width	C00_42044483	C00	42044483	0.0418605	0.00018387	-3.02498	0.819242	0.061445	3.73549	0.0811413
2019	K + PCO	Head_Area	C00_42044483	C00	42044483	0.0418605	4.38609e-05	-68.2803	17.0003	0.0722847	4.35792	0.129473
2019	K	Head_Diameter	C00_42044483	C00	42044483	0.0418605	3.14921e-05	-2.78356	0.680026	0.074972	4.5018	0.0966682
2019	K + PCO	Head_Diameter	C00_42044483	C00	42044483	0.0418605	2.93397e-05	-2.80019	0.682421	0.0753244	4.53254	0.0978263
2019	K	Head_Area	C00_42044483	C00	42044483	0.0418605	2.51795e-05	-68.7342	16.5976	0.0766674	4.59895	0.131201
2019	K + PCO	Head_Height	C00_45762816	C00	45762816	0.0348837	0.000515073	2.6399	0.768893	0.0533525	3.28813	0.144214
2019	K	Head_Height	C00_45762816	C00	45762816	0.0348837	0.000504297	2.55388	0.742065	0.0536009	3.29731	0.134969
2019	K	Head_Area	C00_45762816	C00	45762816	0.0348837	0.000343145	65.5125	18.5094	0.0566024	3.46452	0.137485
2019	K + PCO	Head_Area	C00_45762816	C00	45762816	0.0348837	0.000202279	71.4439	19.4886	0.060594	3.69405	0.163507
2019	K + PCO	Head_Height	C00_45762821	C00	45762821	0.0348837	0.000515073	2.6399	0.768893	0.0533525	3.28813	0.285096
2019	K	Head_Height	C00_45762821	C00	45762821	0.0348837	0.000504297	2.55388	0.742065	0.0536009	3.29731	0.266819
2019	K	Head_Area	C00_45762821	C00	45762821	0.0348837	0.000343145	65.5125	18.5094	0.0566024	3.46452	0.271793
2019	K + PCO	Head_Area	C00_45762821	C00	45762821	0.0348837	0.000202279	71.4439	19.4886	0.060594	3.69405	0.323236
2017	K	HeadHeight	C00_46439884	C00	46439884	0.193089	0.000626589	0.970065	0.286192	0.0456298	3.20302	0.0228829
2017	K + PCO	HeadArea	C00_46439884	C00	46439884	0.193089	0.000599882	24.4791	7.20184	0.0458786	3.22193	0.0215141
2017	K	HeadArea	C00_46439884	C00	46439884	0.193089	0.000126065	27.7729	7.33089	0.0566742	3.89941	0.0276933
2019	K + PCO	Head_Ratio	C00_46693169	C00	46693169	0.318605	0.000715547	-0.0552172	0.016494	0.0507914	3.14536	0.0115165
2019	K + PCO	Head_Height	C00_46693169	C00	46693169	0.318605	0.000377041	-1.0274	0.292479	0.0557764	3.42361	0.0206488
2019	K	Head_Height	C00_46693169	C00	46693169	0.318605	0.000229474	-1.01812	0.279793	0.0597286	3.63927	0.0202774
2017	K + PCO	LeafRatio	C00_48144964	C00	48144964	0.0329861	0.000717501	-0.165032	0.0491664	0.0383652	3.14418	0.0326809
2017	K	LeafRatio	C00_48144964	C00	48144964	0.0329861	0.000585625	-0.165837	0.0486068	0.0396124	3.23238	0.0330008
2017	K + PCO	LeafRatio	C00_48169801	C00	48169801	0.0295139	0.00012497	-0.206143	0.0543191	0.0487782	3.9032	0.13042
2017	K	LeafRatio	C00_48169801	C00	48169801	0.0295139	0.000113992	-0.205387	0.0537816	0.0493783	3.94313	0.129465
2018	K	First_LeafArea	C00_48977584	C00	48977584	0.0542857	0.000825241	74.1323	22.4307	0.0605076	3.08342	0.0397444
2017	K + PCO	HeadWidth	C00_49574586	C00	49574586	0.166667	0.000781314	-1.09054	0.327576	0.0440535	3.10717	0.00210262
2017	K + PCO	HeadWidth	C00_49574589	C00	49574589	0.166667	0.000781314	-1.09054	0.327576	0.0440535	3.10717	0.0464583
2018	K + PCO	HeadWidth	C00_50123975	C00	50123975	0.178344	0.000626663	2.9879	0.887334	0.0696737	3.20297	0.0362493
2018	K + PCO	HeadRatio	C00_50123975	C00	50123975	0.178344	0.000306767	-0.0779405	0.0219816	0.0769546	3.51319	0.0444423
2018	K + PCO	HeadWidth	C00_50124017	C00	50124017	0.178344	0.000626663	2.9879	0.887334	0.0696737	3.20297	0.113182
2018	K + PCO	HeadRatio	C00_50124017	C00	50124017	0.178344	0.000306767	-0.0779405	0.0219816	0.0769546	3.51319	0.138763
2019	K	Leaf_Number	C00_51145519	C00	51145519	0.183721	0.000525852	2.64128	0.769875	0.053274	3.27914	0.0727076
2019	K + PCO	Leaf_Number	C00_51145519	C00	51145519	0.183721	0.000362037	2.73121	0.775267	0.0560914	3.44125	0.0777434
2019	K + PCO	Leaf_Number	C00_51145538	C00	51145538	0.197674	0.000770404	2.4954	0.74978	0.050215	3.11328	0.0661551
2019	K	Leaf_Number	C00_51145538	C00	51145538	0.197674	0.000512096	2.56132	0.745082	0.053481	3.29065	0.0696966
2019	K	Leaf_Number	C00_51145543	C00	51145543	0.183721	0.000525852	2.64128	0.769875	0.053274	3.27914	0.0719159
2019	K + PCO	Leaf_Number	C00_51145543	C00	51145543	0.183721	0.000362037	2.73121	0.775267	0.0560914	3.44125	0.0768969
2019	K	Leaf_Number	C00_51145555	C00	51145555	0.183721	0.000525852	2.64128	0.769875	0.053274	3.27914	0.080463
2019	K + PCO	Leaf_Number	C00_51145555	C00	51145555	0.183721	0.000362037	2.73121	0.775267	0.0560914	3.44125	0.086036
2019	K	Leaf_Number	C00_51145590	C00	51145590	0.183721	0.000525852	2.64128	0.769875	0.053274	3.27914	0.0490731
2019	K + PCO	Leaf_Number	C00_51145590	C00	51145590	0.183721	0.000362037	2.73121	0.775267	0.0560914	3.44125	0.052472
2018	K + PCO	HeadRatio	C00_53762323	C00	53762323	0.066879	0.000815991	0.11655	0.0353316	0.0669633	3.08831	0.0976132
2019	K + PCO	Second_LeafWidth	C00_54056082	C00	54056082	0.201646	0.00038891	-1.84826	0.526544	0.0494408	3.41015	0.00578983
2019	K + PCO	Head_Weight	C00_54056082	C00	54056082	0.204651	0.000149211	-0.301441	0.0806325	0.0629372	3.8262	0.00766129
2019	K + PCO	Head_Weight	C00_54056127	C00	54056127	0.267442	0.000284795	-0.256104	0.0714856	0.0579507	3.54547	0.105028
2017	K + PCO	HeadHeight	C00_55252933	C00	55252933	0.0447154	0.000791338	1.70508	0.512693	0.0439654	3.10164	0.169168
2017	K	HeadArea	C00_55252933	C00	55252933	0.0447154	0.000728974	44.2791	13.2196	0.0445817	3.13729	0.168442
2018	K + PCO	First_LeafRatio	C00_55987942	C00	55987942	0.0371429	0.000782255	0.129527	0.0390686	0.0608776	3.10665	0.174379
2018	K	First_LeafRatio	C00_55987942	C00	55987942	0.0371429	0.000279068	0.147073	0.0410706	0.0706559	3.55429	0.224822
2018	K + PCO	Second_LeafRatio	C00_55987942	C00	55987942	0.0371429	0.000242667	0.156639	0.0433923	0.0717571	3.61499	0.213802
2018	K	Second_LeafRatio	C00_55987942	C00	55987942	0.0371429	6.4197e-05	0.17954	0.0457666	0.0841844	4.19249	0.28089
2019	K	Head_Weight	C00_58747794	C00	58747794	0.0488372	0.000867472	0.462988	0.140347	0.0493574	3.06174	0.251227
2019	K	Head_Weight	C00_58747821	C00	58747821	0.0488372	0.000867472	0.462988	0.140347	0.0493574	3.06174	0.235957
2019	K	Head_Weight	C00_58747837	C00	58747837	0.0488372	0.000867472	0.462988	0.140347	0.0493574	3.06174	0.231655
2019	K	Head_Weight	C00_58747874	C00	58747874	0.0488372	0.000867472	0.462988	0.140347	0.0493574	3.06174	0.059915
2019	K + PCO	Second_LeafLength	C00_59389293	C00	59389293	0.0246914	0.000441174	-5.4861	1.57734	0.0485628	3.35539	0.11913
2019	K + PCO	First_LeafRatio	C00_59631467	C00	59631467	0.0311203	0.000970948	0.111497	0.0340975	0.043398	3.0128	0.015561
2019	K	First_LeafRatio	C00_59631467	C00	59631467	0.0311203	0.000410053	0.11899	0.0340095	0.0495241	3.38716	0.0177225
2019	K	Second_LeafRatio	C00_59631467	C00	59631467	0.0308642	0.000322102	0.118544	0.0332986	0.0508191	3.49201	0.0174287
2018	K + PCO	Second_LeafRatio	C00_59863373	C00	59863373	0.0542857	9.8652e-05	0.161295	0.0422235	0.0800044	4.00589	0.2772
2018	K	Second_LeafRatio	C00_59863373	C00	59863373	0.0542857	1.3908e-05	0.181192	0.04266	0.0979504	4.85674	0.349808
2018	K + PCO	Second_LeafRatio	C00_59863379	C00	59863379	0.0542857	9.8652e-05	0.161295	0.0422235	0.0800044	4.00589	0.248674
2018	K	Second_LeafRatio	C00_59863379	C00	59863379	0.0542857	1.3908e-05	0.181192	0.04266	0.0979504	4.85674	0.313811
2018	K	First_LeafArea	C00_60636093	C00	60636093	0.494286	0.000919218	48.0874	14.6778	0.0594915	3.03658	0.0240858
2018	K + PCO	First_LeafArea	C00_60636093	C00	60636093	0.494286	0.000256427	53.3345	14.8295	0.0712482	3.59104	0.0296288
2019	K	First_LeafRatio	C00_61433580	C00	61433580	0.460581	0.000841273	0.0470419	0.0142097	0.0444576	3.07506	0.00419528
2019	K	First_LeafRatio	C00_61433586	C00	61433586	0.466805	0.000329852	0.0497721	0.0140054	0.0510543	3.48168	0.0427936
2019	K	Head_Diameter	C00_61513162	C00	61513162	0.027907	0.000933201	-2.9967	0.913849	0.0487849	3.03003	0.0668449
2019	K + PCO	Head_Diameter	C00_61513162	C00	61513162	0.027907	0.000510076	-3.15626	0.918616	0.0534283	3.29236	0.0741527
2019	K	Head_Diameter	C00_61513199	C00	61513199	0.027907	0.000933201	-2.9967	0.913849	0.0487849	3.03003	0.207387
2019	K + PCO	Head_Diameter	C00_61513199	C00	61513199	0.027907	0.000510076	-3.15626	0.918616	0.0534283	3.29236	0.23006
2017	K + PCO	HeadRatio	C00_61514821	C00	61514821	0.0325203	0.000174379	0.13289	0.0358342	0.0543716	3.75851	0.300187
2017	K	HeadRatio	C00_61514821	C00	61514821	0.0325203	0.000162464	0.136631	0.0366479	0.0549355	3.78924	0.317325
2017	K + PCO	HeadRatio	C00_61514856	C00	61514856	0.0325203	0.000174379	0.13289	0.0358342	0.0543716	3.75851	0.266993
2017	K	HeadRatio	C00_61514856	C00	61514856	0.0325203	0.000162464	0.136631	0.0366479	0.0549355	3.78924	0.282236
2018	K	Second_LeafLength	C00_61954390	C00	61954390	0.0285714	0.000839192	-4.37184	1.3246	0.0603497	3.07614	0.0360661
2019	K + PCO	Head_Width	C00_62841783	C00	62841783	0.423256	0.000769513	1.19707	0.359644	0.0502241	3.11378	0.036702
2019	K	Head_Weight	C00_62841783	C00	62841783	0.423256	0.000621043	0.215271	0.0635486	0.0519737	3.20688	0.0462654
2019	K	Head_Diameter	C00_62841783	C00	62841783	0.423256	0.000514081	0.988429	0.287615	0.0534508	3.28897	0.035207
2019	K + PCO	Head_Diameter	C00_62841783	C00	62841783	0.423256	0.000419688	1.03185	0.296024	0.0549445	3.37707	0.0383679
2017	K + PCO	LeafLength	C00_62940525	C00	62940525	0.487847	0.000668416	-4.93775	1.46284	0.038789	3.17495	0.0197441
2017	K	LeafLength	C00_62940525	C00	62940525	0.487847	0.000470975	-5.05884	1.45843	0.0409167	3.327	0.0207244
2017	K + PCO	HeadHeight	C00_67147429	C00	67147429	0.292683	0.000916372	-0.785047	0.238887	0.0429511	3.03793	0.0180216
2017	K	HeadHeight	C00_67147429	C00	67147429	0.292683	0.000759389	-0.820542	0.245775	0.0442985	3.11954	0.0196881
2017	K	LeafRatio	C00_67326590	C00	67326590	0.0260417	0.00077181	0.20633	0.0618049	0.0379587	3.11249	0.301884
2017	K	LeafLength	C00_67381832	C00	67381832	0.0381944	0.000679598	4.56087	1.3524	0.0387211	3.16775	0.0299433
2017	K	LeafRatio	C00_68353789	C00	68353789	0.0260417	0.000671997	0.216415	0.0641149	0.0387884	3.17263	0.0550366
2017	K	LeafRatio	C00_68353796	C00	68353796	0.0260417	0.000671997	0.216415	0.0641149	0.0387884	3.17263	0.145722
2017	K	LeafRatio	C00_68353797	C00	68353797	0.0260417	0.000671997	0.216415	0.0641149	0.0387884	3.17263	0.198325
2017	K	HeadHeight	C00_68467470	C00	68467470	0.0772358	0.00022502	1.57583	0.431811	0.0526978	3.64778	0.179113
2017	K + PCO	HeadHeight	C00_68467470	C00	68467470	0.0772358	0.000114529	1.6072	0.422058	0.0572429	3.94108	0.186315
2019	K + PCO	First_LeafRatio	C00_71048776	C00	71048776	0.139004	0.000396665	-0.0740624	0.0211315	0.0496931	3.40158	0.0374165
2019	K	First_LeafRatio	C00_71048776	C00	71048776	0.139004	0.000342422	-0.073557	0.0207532	0.0507915	3.46544	0.0369076
2019	K + PCO	First_LeafRatio	C00_71048779	C00	71048779	0.139004	0.000396665	-0.0740624	0.0211315	0.0496931	3.40158	0.0149436
2019	K	First_LeafRatio	C00_71048779	C00	71048779	0.139004	0.000342422	-0.073557	0.0207532	0.0507915	3.46544	0.0147404
2019	K + PCO	First_LeafRatio	C00_71048826	C00	71048826	0.139004	0.000396665	-0.0740624	0.0211315	0.0496931	3.40158	0.0939132
2019	K	First_LeafRatio	C00_71048826	C00	71048826	0.139004	0.000342422	-0.073557	0.0207532	0.0507915	3.46544	0.092636
2019	K + PCO	Head_Width	C00_72506465	C00	72506465	0.195349	0.000915549	1.60048	0.487647	0.0488671	3.03832	0.00606504
2017	K + PCO	HeadWidth	C00_72506465	C00	72506465	0.22561	0.000840431	1.09905	0.33208	0.0435493	3.0755	0.0638518
2019	K + PCO	Head_Diameter	C00_72506465	C00	72506465	0.195349	0.000555826	1.35406	0.396652	0.0527598	3.25506	0.00610796
2017	K + PCO	HeadArea	C00_72506465	C00	72506465	0.22561	0.000513864	26.9585	7.83839	0.0469464	3.28915	0.0782834
2019	K + PCO	Head_Width	C00_72506496	C00	72506496	0.195349	0.000915549	1.60048	0.487647	0.0488671	3.03832	0.0208817
2017	K + PCO	HeadWidth	C00_72506496	C00	72506496	0.22561	0.000840431	1.09905	0.33208	0.0435493	3.0755	0.0638518
2019	K + PCO	Head_Diameter	C00_72506496	C00	72506496	0.195349	0.000555826	1.35406	0.396652	0.0527598	3.25506	0.0210295
2017	K + PCO	HeadArea	C00_72506496	C00	72506496	0.22561	0.000513864	26.9585	7.83839	0.0469464	3.28915	0.0782834
2018	K	HeadRatio	C00_73535522	C00	73535522	0.0286624	0.000303469	-0.156108	0.0439189	0.0773196	3.51789	0.0848099
2018	K	Second_LeafRatio	C00_73535522	C00	73535522	0.0314286	0.000126571	0.206626	0.0548212	0.0779697	3.89767	0.0741404
2018	K + PCO	HeadRatio	C00_73535522	C00	73535522	0.0286624	0.000122589	-0.1954	0.0519467	0.0861805	3.91155	0.132875
2018	K	Second_LeafLength	C00_73981664	C00	73981664	0.0285714	0.000375793	-5.0259	1.43293	0.0678834	3.42505	0.830274
2018	K + PCO	Second_LeafLength	C00_73981664	C00	73981664	0.0285714	0.000314455	-5.25376	1.48126	0.0693627	3.50244	0.907265
2017	K	LeafArea	C00_74294393	C00	74294393	0.196181	0.000720816	-100.185	29.8459	0.0383683	3.14218	0.0186832
2018	K + PCO	HeadArea	C00_74510375	C00	74510375	0.334395	0.000502508	105.799	30.9039	0.0719327	3.29886	0.234029
2018	K + PCO	HeadHeight	C00_74510375	C00	74510375	0.334395	8.94672e-05	3.85021	1.0046	0.0893146	4.04834	0.297118
2018	K + PCO	Second_LeafRatio	C00_74510407	C00	74510407	0.497143	0.000829764	-0.829071	0.251247	0.0603254	3.08105	0.952996
2018	K + PCO	First_LeafRatio	C00_74510407	C00	74510407	0.497143	0.000746578	-0.75275	0.226212	0.0613145	3.12693	0.937071
2018	K	First_LeafRatio	C00_74510407	C00	74510407	0.497143	5.16426e-06	-0.985445	0.221784	0.106684	5.28699	1.60596
2018	K	Second_LeafRatio	C00_74510407	C00	74510407	0.497143	2.20661e-06	-1.13777	0.247142	0.114062	5.65627	1.7948
2019	K + PCO	Head_Weight	C00_78639781	C00	78639781	0.0325581	8.01183e-05	-0.722182	0.186021	0.0677016	4.09627	0.710953
2018	K + PCO	First_LeafLength	C00_78639810	C00	78639810	0.314286	0.000943081	1.21411	0.371764	0.0591254	3.02545	0.0503415
2018	K	Second_LeafLength	C00_78639810	C00	78639810	0.314286	0.000854043	1.36963	0.415565	0.0601845	3.06852	0.050941
2018	K	First_LeafLength	C00_78639810	C00	78639810	0.314286	0.000769046	1.20463	0.362447	0.0611715	3.11405	0.0495591
2019	K + PCO	First_LeafLength	C00_78639810	C00	78639810	0.30083	0.000683438	1.66733	0.49564	0.0458711	3.1653	0.0379666
2019	K	First_LeafLength	C00_78639810	C00	78639810	0.30083	0.00047467	1.71441	0.495322	0.0484941	3.32361	0.0401408
2018	K + PCO	HeadWidth	C00_79592044	C00	79592044	0.130573	0.000385228	3.57352	1.02397	0.0746419	3.41428	0.032092
2019	K + PCO	Head_Weight	C00_80678170	C00	80678170	0.462791	0.00096519	0.219169	0.0670691	0.0484544	3.01539	0.0383268
2019	K	Head_Height	C00_81834928	C00	81834928	0.146512	0.000161409	1.46717	0.394024	0.0624526	3.79207	0.083814
2017	K + PCO	HeadRatio	C00_83924821	C00	83924821	0.317073	0.000384071	-0.0513847	0.0146236	0.0489522	3.41559	0.00474345
2017	K	HeadRatio	C00_83924821	C00	83924821	0.317073	0.000361792	-0.0514757	0.0145773	0.049426	3.44154	0.00476028
2019	K + PCO	Second_LeafWidth	C00_84969093	C00	84969093	0.320988	0.000978038	-2.10439	0.643893	0.0430042	3.00964	0.0467523
2019	K + PCO	First_LeafArea	C00_84969093	C00	84969093	0.321577	0.000818051	-85.9536	25.9195	0.0446054	3.08722	0.0487168
2019	K	First_LeafArea	C00_84969093	C00	84969093	0.321577	0.000708774	-77.775	23.1725	0.0456676	3.14949	0.039887
2019	K + PCO	Head_Weight	C00_86548663	C00	86548663	0.137209	0.000658147	0.248689	0.0738011	0.0514435	3.18168	0.0610982
2019	K	Head_Weight	C00_86548663	C00	86548663	0.137209	0.000539241	0.249896	0.0729777	0.0530776	3.26822	0.0616928
2018	K	Second_LeafRatio	C00_87093135	C00	87093135	0.0828571	0.000867811	0.105179	0.0319541	0.0600338	3.06157	0.0283498
2017	K + PCO	LeafRatio	C00_87245638	C00	87245638	0.0520833	0.000958086	0.136635	0.0416751	0.0366353	3.0186	0.06298
2018	K	Second_LeafRatio	C00_88234765	C00	88234765	0.0457143	0.000750616	0.152583	0.0458207	0.0613997	3.12458	0.376375
2017	K	LeafRatio	C00_88234765	C00	88234765	0.0399306	0.000116548	0.187774	0.0492369	0.0492466	3.9335	0.13877
2018	K	First_LeafRatio	C00_88234765	C00	88234765	0.0457143	5.21667e-05	0.163189	0.0411191	0.0860716	4.28261	0.513514
2017	K + PCO	LeafLength	C00_89087153	C00	89087153	0.145833	0.000214211	3.35471	0.915249	0.0455774	3.66916	0.0396132
2017	K	LeafLength	C00_89087153	C00	89087153	0.145833	0.000143396	3.33592	0.886167	0.0480139	3.84346	0.0391707
2018	K	Second_LeafRatio	C00_89307550	C00	89307550	0.0342857	0.000831122	0.164811	0.0498963	0.0604407	3.08034	0.192443
2017	K + PCO	HeadRatio	C00_89451039	C00	89451039	0.0325203	0.000428773	0.124882	0.0358257	0.0481941	3.36777	0.0817698
2019	K	Head_Ratio	C00_89451039	C00	89451039	0.0209302	0.000165526	0.224777	0.0604634	0.062258	3.78113	0.138571
2019	K + PCO	Head_Ratio	C00_89451039	C00	89451039	0.0209302	9.11607e-05	0.234529	0.0608711	0.0667151	4.04019	0.150856
2018	K + PCO	HeadWidth	C00_89773839	C00	89773839	0.0477707	0.000610705	4.92395	1.45943	0.069938	3.21417	0.23312
2018	K + PCO	HeadHeight	C00_90024326	C00	90024326	0.257962	0.000484316	1.99912	0.582362	0.0723093	3.31487	0.0256068
2018	K + PCO	First_LeafArea	C00_90024326	C00	90024326	0.24	0.000470656	46.5387	13.5036	0.0656198	3.3273	0.0303296
2018	K + PCO	HeadArea	C00_90024326	C00	90024326	0.257962	0.000382495	63.0218	18.0494	0.0747144	3.41737	0.0265465
2018	K	First_LeafArea	C00_90024326	C00	90024326	0.24	0.00029091	47.2197	13.2239	0.0702694	3.53624	0.0312237
2018	K	HeadArea	C00_90024326	C00	90024326	0.257962	9.33845e-05	67.3077	17.5692	0.0892456	4.02972	0.03028
2018	K + PCO	HeadWidth	C00_90024326	C00	90024326	0.257962	8.8367e-05	3.00399	0.783242	0.0894374	4.05371	0.0354341
2018	K	First_LeafWidth	C00_90024326	C00	90024326	0.24	8.21852e-05	1.43868	0.371971	0.0819302	4.08521	0.0334633
2018	K	HeadHeight	C00_90024326	C00	90024326	0.257962	7.04262e-05	2.22445	0.571243	0.0920665	4.15227	0.0317049
2018	K + PCO	First_LeafWidth	C00_90024326	C00	90024326	0.24	6.34437e-05	1.45314	0.370827	0.0840079	4.19761	0.0341392
2018	K	HeadWidth	C00_90024326	C00	90024326	0.257962	3.82459e-05	3.02765	0.751889	0.0981231	4.41742	0.0359945
2018	K	First_LeafWidth	C00_90024373	C00	90024373	0.202857	0.000843799	1.39151	0.42179	0.0602982	3.07376	0.0718367
2018	K + PCO	First_LeafWidth	C00_90024373	C00	90024373	0.202857	0.000566893	1.4118	0.415356	0.0638866	3.2465	0.0739473
2019	K	Second_LeafRatio	C00_90026017	C00	90026017	0.170782	0.000819166	-0.0463797	0.0139784	0.0442926	3.08663	0.0302296
2019	K + PCO	Second_LeafRatio	C00_90026017	C00	90026017	0.170782	0.00071016	-0.0467858	0.0139487	0.0452419	3.14864	0.0307613
2019	K	Head_Width	C00_92036890	C00	92036890	0.027907	0.000574356	3.08303	0.904671	0.0525847	3.24082	0.143117
2019	K + PCO	Head_Height	C00_92036890	C00	92036890	0.027907	0.000570366	2.54232	0.746197	0.0525588	3.24385	0.196886
2019	K	Head_Height	C00_92036890	C00	92036890	0.027907	0.000381601	2.53834	0.722619	0.0557752	3.41839	0.19627
2019	K + PCO	Head_Area	C00_92036890	C00	92036890	0.027907	6.49222e-05	73.843	18.7912	0.0693052	4.18761	0.257126
2019	K	Head_Area	C00_92036890	C00	92036890	0.027907	3.04432e-05	73.4026	17.9004	0.075229	4.51651	0.254068
2019	K + PCO	Second_LeafRatio	C00_92272429	C00	92272429	0.197531	0.000635513	-0.0582317	0.0172108	0.0460174	3.19688	0.0221628
2018	K	Second_LeafLength	C00_92982346	C00	92982346	0.0428571	0.000430859	3.95506	1.13877	0.066606	3.36567	0.231475
2018	K + PCO	Second_LeafLength	C00_92982346	C00	92982346	0.0428571	8.31884e-05	4.58602	1.18857	0.0815539	4.07994	0.311222
2018	K	Second_LeafLength	C00_92985598	C00	92985598	0.0685714	0.000762474	3.30978	0.995161	0.0612522	3.11778	0.115201
2018	K + PCO	Second_LeafLength	C00_92985598	C00	92985598	0.0685714	0.000232819	3.78349	1.04522	0.0721391	3.63298	0.150536
2019	K + PCO	Head_Height	C00_92985598	C00	92985598	0.0488372	0.000205273	2.42724	0.662746	0.0604807	3.68767	0.229821
2019	K	Head_Height	C00_92985598	C00	92985598	0.0488372	0.00018779	2.37763	0.644806	0.0612817	3.72633	0.220521
2017	K	HeadHeight	C00_93774111	C00	93774111	0.0162602	0.000467246	2.66166	0.767945	0.0476595	3.33045	0.269347
2017	K + PCO	HeadArea	C00_93774111	C00	93774111	0.0162602	0.000430187	71.2918	20.4569	0.0481714	3.36634	0.285304
2017	K	HeadArea	C00_93774111	C00	93774111	0.0162602	6.55933e-05	77.7023	19.7246	0.061135	4.18314	0.33892
2017	K	HeadHeight	C00_93774147	C00	93774147	0.0162602	0.000467246	2.66166	0.767945	0.0476595	3.33045	0.119754
2017	K + PCO	HeadArea	C00_93774147	C00	93774147	0.0162602	0.000430187	71.2918	20.4569	0.0481714	3.36634	0.126849
2017	K	HeadArea	C00_93774147	C00	93774147	0.0162602	6.55933e-05	77.7023	19.7246	0.061135	4.18314	0.150687
2018	K + PCO	Second_LeafArea	C00_94962273	C00	94962273	0.0428571	0.000557685	104.407	30.6789	0.0640394	3.25361	0.037253
2018	K	Second_LeafLength	C00_94962273	C00	94962273	0.0428571	5.49235e-05	4.45634	1.12608	0.0856039	4.26024	0.0437946
2018	K + PCO	Second_LeafLength	C00_94962273	C00	94962273	0.0428571	2.7865e-05	4.88311	1.19233	0.0913934	4.55494	0.0525845
2018	K + PCO	First_LeafLength	C00_95209113	C00	95209113	0.0571429	0.000967165	2.44382	0.749855	0.0588888	3.0145	0.0521196
2019	K + PCO	Second_LeafRatio	C00_95909739	C00	95909739	0.294239	0.000259573	-0.0435609	0.0120628	0.0522507	3.58574	0.0340089
2019	K	Second_LeafRatio	C00_95909739	C00	95909739	0.294239	0.000160725	-0.0454418	0.012182	0.0556539	3.79392	0.0370092
2019	K	Second_LeafRatio	C00_95909794	C00	95909794	0.364198	0.000893779	-0.0389159	0.0118126	0.0436815	3.04877	0.0259904
2019	K + PCO	Second_LeafRatio	C00_95909794	C00	95909794	0.364198	0.000761919	-0.0389631	0.0116816	0.0447503	3.11809	0.0260534
2019	K + PCO	Second_LeafRatio	C00_95909814	C00	95909814	0.294239	0.000259573	-0.0435609	0.0120628	0.0522507	3.58574	0.0179596
2019	K	Second_LeafRatio	C00_95909814	C00	95909814	0.294239	0.000160725	-0.0454418	0.012182	0.0556539	3.79392	0.019544
2019	K	Second_LeafRatio	C00_96267078	C00	96267078	0.207819	0.000781305	0.0608978	0.0182842	0.0446243	3.10718	0.0646073
2019	K + PCO	Second_LeafRatio	C00_96267078	C00	96267078	0.207819	0.000498997	0.0645295	0.0187236	0.0477046	3.3019	0.0725429
2018	K + PCO	First_LeafArea	C00_96614194	C00	96614194	0.377143	0.000830152	-33.1428	10.0442	0.0603211	3.08084	0.0156881
2018	K	Second_LeafArea	C00_96614194	C00	96614194	0.377143	0.000657995	-37.61	11.1784	0.0626377	3.18178	0.0139096
2018	K + PCO	Second_LeafArea	C00_96614194	C00	96614194	0.377143	0.000290998	-40.6366	11.3962	0.0700799	3.53611	0.0162384
2019	K + PCO	Second_LeafWidth	C00_99332421	C00	99332421	0.0761317	0.000705739	2.24403	0.668703	0.0452855	3.15136	0.0480455
2019	K	Second_LeafWidth	C00_99332421	C00	99332421	0.0761317	0.000530519	2.25147	0.65589	0.0473345	3.2753	0.0483649
2019	K + PCO	Second_LeafRatio	C00_99471386	C00	99471386	0.12963	0.000945263	0.0745478	0.0227454	0.0432427	3.02445	0.0536239
2019	K	Second_LeafRatio	C00_99471386	C00	99471386	0.12963	0.000697323	0.0735683	0.0218893	0.045421	3.15657	0.052224
2019	K + PCO	First_LeafRatio	C00_102232378	C00	102232378	0.221992	0.000982652	0.0562312	0.0172134	0.0433135	3.0076	0.0140327
2018	K + PCO	First_LeafRatio	C00_102232378	C00	102232378	0.245714	0.000218912	0.0672767	0.0185104	0.0727066	3.65973	0.0399021
2018	K + PCO	Second_LeafRatio	C00_102232378	C00	102232378	0.245714	0.000175778	0.0757928	0.0205589	0.0747244	3.75503	0.0424579
2019	K	First_LeafRatio	C00_102232378	C00	102232378	0.221992	0.000159315	0.0629169	0.0168588	0.0561535	3.79774	0.017568
2018	K	First_LeafRatio	C00_102232378	C00	102232378	0.245714	0.000111544	0.0720513	0.0189696	0.0791314	3.95255	0.0457667
2018	K	Second_LeafRatio	C00_102232378	C00	102232378	0.245714	3.22226e-05	0.0860917	0.0211386	0.0904298	4.49184	0.0547804
2018	K + PCO	Second_LeafRatio	C00_102299929	C00	102299929	0.348571	0.000706535	0.0635369	0.0190114	0.0618302	3.15087	0.0180179
2018	K	First_LeafRatio	C00_102300062	C00	102300062	0.351429	0.000823898	0.0576609	0.0174445	0.0605229	3.08413	0.0267725
2018	K + PCO	First_LeafRatio	C00_102300062	C00	102300062	0.351429	0.000730649	0.0570836	0.0171254	0.0615163	3.13629	0.0262391
2018	K	Second_LeafRatio	C00_102300062	C00	102300062	0.351429	0.000252034	0.0700935	0.0194391	0.0716028	3.59854	0.0331679
2018	K + PCO	Second_LeafRatio	C00_102300062	C00	102300062	0.351429	0.000211337	0.0692914	0.0190207	0.0730308	3.67502	0.0324132
2018	K + PCO	Second_LeafRatio	C00_102324149	C00	102324149	0.145714	0.000255613	0.087547	0.024337	0.0712776	3.59242	0.0382731
2018	K	Second_LeafRatio	C00_102324149	C00	102324149	0.145714	0.000165381	0.0935607	0.0252418	0.0755046	3.78152	0.0437118
2019	K	Head_Height	C00_103167736	C00	103167736	0.27907	0.000733775	-1.45422	0.434932	0.0506686	3.13444	0.00941684
2019	K + PCO	Head_Height	C00_103167736	C00	103167736	0.27907	4.41344e-05	-2.19744	0.547302	0.0722376	4.35522	0.021502
2019	K	Head_Height	C00_103167737	C00	103167737	0.276744	0.000526797	-1.50659	0.439198	0.05326	3.27836	0.0276376
2019	K + PCO	Head_Height	C00_103167737	C00	103167737	0.276744	2.93918e-05	-2.28176	0.55613	0.0753111	4.53177	0.0633943
2019	K	Head_Height	C00_103167740	C00	103167740	0.274419	0.000471238	-1.51347	0.437544	0.0541301	3.32676	0.0401147
2019	K + PCO	Head_Height	C00_103167740	C00	103167740	0.274419	2.34996e-05	-2.29078	0.551936	0.0769958	4.62894	0.091901
2019	K	Head_Height	C00_103167824	C00	103167824	0.274419	0.000471238	-1.51347	0.437544	0.0541301	3.32676	0.0476741
2019	K + PCO	Head_Height	C00_103167824	C00	103167824	0.274419	2.34996e-05	-2.29078	0.551936	0.0769958	4.62894	0.109219
2017	K + PCO	HeadArea	C00_108877622	C00	108877622	0.213415	0.000275428	30.297	8.42267	0.0512382	3.55999	0.0732527
2017	K + PCO	HeadWidth	C00_108877622	C00	108877622	0.213415	0.000263204	1.28652	0.356544	0.0515499	3.57971	0.0648209
2018	K + PCO	Second_LeafRatio	C00_110960027	C00	110960027	0.0885714	0.000612539	0.0922975	0.0273143	0.063164	3.21287	0.0506694
2018	K	Second_LeafRatio	C00_110960027	C00	110960027	0.0885714	0.000536336	0.0986347	0.0288627	0.0645561	3.27056	0.0578661
2018	K + PCO	Second_LeafRatio	C00_116041557	C00	116041557	0.38	0.000768346	-0.104705	0.031537	0.0610456	3.11444	0.0158587
2019	K	Second_LeafRatio	C00_116931735	C00	116931735	0.037037	0.000364201	-0.106093	0.0300621	0.0499623	3.43866	0.113129
2019	K + PCO	Second_LeafRatio	C00_116931735	C00	116931735	0.037037	0.000235645	-0.108238	0.0297771	0.0529216	3.62774	0.11775
2019	K	Second_LeafWidth	C00_116931735	C00	116931735	0.037037	0.000230523	3.72204	1.02171	0.0531487	3.63729	0.226523
2019	K + PCO	Second_LeafWidth	C00_116931735	C00	116931735	0.037037	0.000117508	3.90985	1.02854	0.0577325	3.92993	0.249959
2019	K + PCO	Head_Weight	C00_116931763	C00	116931763	0.0837209	0.000294621	0.394227	0.110297	0.0576882	3.53074	0.0474925
2019	K	Head_Weight	C00_116931763	C00	116931763	0.0837209	0.000275707	0.390258	0.108591	0.0583039	3.55955	0.0465408
2017	K	HeadRatio	C00_118245144	C00	118245144	0.0223577	0.000863891	0.126355	0.0382432	0.0434049	3.06354	0.0527069
2019	K + PCO	Second_LeafRatio	C00_118245144	C00	118245144	0.0205761	0.000278804	0.165492	0.0460528	0.0517546	3.5547	0.372274
2019	K	Second_LeafRatio	C00_118245144	C00	118245144	0.0205761	0.000222807	0.165722	0.0453875	0.0533855	3.65207	0.373309
2018	K	Second_LeafRatio	C00_118245144	C00	118245144	0.0485714	7.49753e-05	0.161677	0.0415797	0.0827691	4.12508	0.128898
2019	K	First_LeafRatio	C00_118245144	C00	118245144	0.0186722	1.8018e-06	0.222032	0.0474708	0.0867755	5.74429	0.628499
2019	K + PCO	First_LeafRatio	C00_118245144	C00	118245144	0.0186722	6.91589e-07	0.236408	0.0487829	0.0928505	6.16015	0.712526
2019	K	First_LeafRatio	C00_118245179	C00	118245179	0.0248963	0.000646516	0.132736	0.0392632	0.0463164	3.18942	0.245845
2018	K	Second_LeafRatio	C00_118245179	C00	118245179	0.0514286	0.00046562	0.136178	0.0394323	0.0658803	3.33197	0.132262
2019	K + PCO	First_LeafRatio	C00_118245179	C00	118245179	0.0248963	0.000417218	0.138842	0.03976	0.0493388	3.37964	0.26898
2017	K	HeadRatio	C00_118245242	C00	118245242	0.0223577	0.000863891	0.126355	0.0382432	0.0434049	3.06354	0.272603
2019	K + PCO	Second_LeafRatio	C00_118245242	C00	118245242	0.0226337	0.000781945	0.147216	0.0442286	0.044569	3.10682	0.319273
2019	K	Second_LeafRatio	C00_118245242	C00	118245242	0.0226337	0.00052783	0.150514	0.0438302	0.04737	3.27751	0.333738
2018	K	Second_LeafRatio	C00_118245242	C00	118245242	0.0485714	7.49753e-05	0.161677	0.0415797	0.0827691	4.12508	0.309047
2019	K	First_LeafRatio	C00_118245242	C00	118245242	0.0207469	5.88963e-05	0.181561	0.0458192	0.0630759	4.22991	0.457182
2019	K + PCO	First_LeafRatio	C00_118245242	C00	118245242	0.0207469	4.08946e-05	0.189031	0.0467921	0.0654756	4.38833	0.495573
2017	K	HeadRatio	C00_118245253	C00	118245253	0.0223577	0.000863891	0.126355	0.0382432	0.0434049	3.06354	0.144269
2019	K + PCO	Second_LeafRatio	C00_118245253	C00	118245253	0.0226337	0.000781945	0.147216	0.0442286	0.044569	3.10682	0.301543
2019	K	Second_LeafRatio	C00_118245253	C00	118245253	0.0226337	0.00052783	0.150514	0.0438302	0.04737	3.27751	0.315204
2018	K	Second_LeafRatio	C00_118245253	C00	118245253	0.0542857	0.000182817	0.150579	0.0408863	0.0745783	3.73798	0.286414
2019	K	First_LeafRatio	C00_118245253	C00	118245253	0.0207469	5.88963e-05	0.181561	0.0458192	0.0630759	4.22991	0.431275
2019	K + PCO	First_LeafRatio	C00_118245253	C00	118245253	0.0207469	4.08946e-05	0.189031	0.0467921	0.0654756	4.38833	0.46749
2019	K + PCO	Second_LeafRatio	C00_118245274	C00	118245274	0.0226337	0.000781945	0.147216	0.0442286	0.044569	3.10682	0.307382
2019	K	Second_LeafRatio	C00_118245274	C00	118245274	0.0226337	0.00052783	0.150514	0.0438302	0.04737	3.27751	0.321308
2018	K	Second_LeafRatio	C00_118245274	C00	118245274	0.0571429	0.000172933	0.146742	0.0397024	0.0750921	3.76212	0.263294
2019	K	First_LeafRatio	C00_118245274	C00	118245274	0.0207469	5.88963e-05	0.181561	0.0458192	0.0630759	4.22991	0.436947
2019	K + PCO	First_LeafRatio	C00_118245274	C00	118245274	0.0207469	4.08946e-05	0.189031	0.0467921	0.0654756	4.38833	0.473638
2019	K + PCO	Second_LeafRatio	C00_118245341	C00	118245341	0.0102881	0.000177533	0.29139	0.0786779	0.0548829	3.75072	1.12183
2019	K	Second_LeafRatio	C00_118245341	C00	118245341	0.0102881	8.21365e-05	0.293429	0.0754806	0.0602969	4.08546	1.13759
2019	K	First_LeafRatio	C00_118245341	C00	118245341	0.0103734	1.57314e-05	0.32924	0.0774973	0.0721564	4.80323	1.3072
2019	K + PCO	First_LeafRatio	C00_118245341	C00	118245341	0.0103734	1.12996e-05	0.353818	0.0820534	0.0742511	4.94694	1.50965
2017	K + PCO	HeadRatio	C00_118344875	C00	118344875	0.0162602	0.000745204	0.154041	0.046096	0.0443805	3.12772	0.469021
2019	K	Second_LeafLength	C00_118344875	C00	118344875	0.0164609	0.000403914	7.80766	2.22895	0.0492399	3.39371	0.438997
2019	K + PCO	Second_LeafLength	C00_118344875	C00	118344875	0.0164609	0.000336327	8.4601	2.38528	0.0504513	3.47324	0.515432
2017	K	HeadRatio	C00_118344875	C00	118344875	0.0162602	9.46923e-05	0.177508	0.0460424	0.0586313	4.02369	0.622806
2019	K	Second_LeafRatio	C00_118344875	C00	118344875	0.0164609	7.14902e-06	0.228683	0.0518504	0.076929	5.14575	0.604781
2019	K + PCO	Second_LeafRatio	C00_118344875	C00	118344875	0.0164609	5.18133e-06	0.244394	0.0546852	0.078906	5.28556	0.690737
2019	K	First_LeafRatio	C00_118344875	C00	118344875	0.0145228	3.04595e-06	0.250299	0.0546817	0.0832676	5.51628	0.690143
2019	K + PCO	First_LeafRatio	C00_118344875	C00	118344875	0.0145228	4.09245e-07	0.290039	0.0587224	0.0962701	6.38802	0.926686
2017	K + PCO	HeadRatio	C00_118344910	C00	118344910	0.0162602	0.000745204	0.154041	0.046096	0.0443805	3.12772	0.469021
2019	K	Second_LeafLength	C00_118344910	C00	118344910	0.0164609	0.000403914	7.80766	2.22895	0.0492399	3.39371	0.453006
2019	K + PCO	Second_LeafLength	C00_118344910	C00	118344910	0.0164609	0.000336327	8.4601	2.38528	0.0504513	3.47324	0.53188
2017	K	HeadRatio	C00_118344910	C00	118344910	0.0162602	9.46923e-05	0.177508	0.0460424	0.0586313	4.02369	0.622806
2019	K	Second_LeafRatio	C00_118344910	C00	118344910	0.0164609	7.14902e-06	0.228683	0.0518504	0.076929	5.14575	0.624081
2019	K + PCO	Second_LeafRatio	C00_118344910	C00	118344910	0.0164609	5.18133e-06	0.244394	0.0546852	0.078906	5.28556	0.71278
2019	K	First_LeafRatio	C00_118344910	C00	118344910	0.0145228	3.04595e-06	0.250299	0.0546817	0.0832676	5.51628	0.711509
2019	K + PCO	First_LeafRatio	C00_118344910	C00	118344910	0.0145228	4.09245e-07	0.290039	0.0587224	0.0962701	6.38802	0.955374
2017	K + PCO	HeadRatio	C00_118344915	C00	118344915	0.0162602	0.000745204	0.154041	0.046096	0.0443805	3.12772	0.36164
2019	K	Second_LeafLength	C00_118344915	C00	118344915	0.0164609	0.000403914	7.80766	2.22895	0.0492399	3.39371	0.258582
2019	K + PCO	Second_LeafLength	C00_118344915	C00	118344915	0.0164609	0.000336327	8.4601	2.38528	0.0504513	3.47324	0.303604
2017	K	HeadRatio	C00_118344915	C00	118344915	0.0162602	9.46923e-05	0.177508	0.0460424	0.0586313	4.02369	0.480217
2019	K	Second_LeafRatio	C00_118344915	C00	118344915	0.0164609	7.14902e-06	0.228683	0.0518504	0.076929	5.14575	0.356234
2019	K + PCO	Second_LeafRatio	C00_118344915	C00	118344915	0.0164609	5.18133e-06	0.244394	0.0546852	0.078906	5.28556	0.406864
2019	K	First_LeafRatio	C00_118344915	C00	118344915	0.0145228	3.04595e-06	0.250299	0.0546817	0.0832676	5.51628	0.378455
2019	K + PCO	First_LeafRatio	C00_118344915	C00	118344915	0.0145228	4.09245e-07	0.290039	0.0587224	0.0962701	6.38802	0.508168
2019	K	Second_LeafRatio	C00_118344928	C00	118344928	0.0246914	0.00036445	0.145299	0.0411734	0.0499576	3.43836	0.215759
2019	K + PCO	Second_LeafRatio	C00_118344928	C00	118344928	0.0246914	0.000196206	0.156378	0.0424999	0.0541907	3.70729	0.249916
2019	K	First_LeafRatio	C00_118344928	C00	118344928	0.0228216	6.47144e-05	0.167102	0.0423975	0.0624233	4.189	0.267757
2017	K + PCO	HeadRatio	C00_118344928	C00	118344928	0.0243902	5.3118e-05	0.150702	0.0378337	0.0624623	4.27476	0.407668
2017	K	HeadRatio	C00_118344928	C00	118344928	0.0243902	2.30235e-05	0.158266	0.0379589	0.068227	4.63783	0.449614
2019	K + PCO	First_LeafRatio	C00_118344928	C00	118344928	0.0228216	1.64668e-05	0.186955	0.0441528	0.071695	4.78339	0.335159
2017	K + PCO	HeadRatio	C00_118344941	C00	118344941	0.0162602	0.000745204	0.154041	0.046096	0.0443805	3.12772	0.370428
2019	K	Second_LeafLength	C00_118344941	C00	118344941	0.0164609	0.000403914	7.80766	2.22895	0.0492399	3.39371	0.63835
2019	K + PCO	Second_LeafLength	C00_118344941	C00	118344941	0.0164609	0.000336327	8.4601	2.38528	0.0504513	3.47324	0.749494
2017	K	HeadRatio	C00_118344941	C00	118344941	0.0162602	9.46923e-05	0.177508	0.0460424	0.0586313	4.02369	0.491886
2019	K	Second_LeafRatio	C00_118344941	C00	118344941	0.0164609	7.14902e-06	0.228683	0.0518504	0.076929	5.14575	0.879418
2019	K + PCO	Second_LeafRatio	C00_118344941	C00	118344941	0.0164609	5.18133e-06	0.244394	0.0546852	0.078906	5.28556	1.00441
2019	K	First_LeafRatio	C00_118344941	C00	118344941	0.0145228	3.04595e-06	0.250299	0.0546817	0.0832676	5.51628	0.978136
2019	K + PCO	First_LeafRatio	C00_118344941	C00	118344941	0.0145228	4.09245e-07	0.290039	0.0587224	0.0962701	6.38802	1.31339
2017	K	HeadRatio	C00_118364681	C00	118364681	0.0223577	0.000863891	0.126355	0.0382432	0.0434049	3.06354	0.249261
2018	K	Second_LeafRatio	C00_118364681	C00	118364681	0.0571429	0.000488627	0.136446	0.0396508	0.0654288	3.31102	0.191486
2019	K + PCO	Second_LeafRatio	C00_118364681	C00	118364681	0.0226337	9.05423e-05	0.168979	0.0437566	0.0595274	4.04315	0.149395
2019	K	Second_LeafRatio	C00_118364681	C00	118364681	0.0226337	8.13268e-05	0.163757	0.0420996	0.0603653	4.08977	0.140303
2019	K	First_LeafRatio	C00_118364681	C00	118364681	0.0207469	2.31148e-06	0.202193	0.0436688	0.0851139	5.63611	0.201143
2019	K + PCO	First_LeafRatio	C00_118364681	C00	118364681	0.0207469	5.33932e-07	0.225085	0.0460084	0.0945397	6.27251	0.249267
2019	K + PCO	Second_LeafRatio	C00_118364698	C00	118364698	0.0102881	0.000177533	0.29139	0.0786779	0.0548829	3.75072	1.25223
2019	K	Second_LeafRatio	C00_118364698	C00	118364698	0.0102881	8.21365e-05	0.293429	0.0754806	0.0602969	4.08546	1.26982
2019	K	First_LeafRatio	C00_118364698	C00	118364698	0.0103734	1.57314e-05	0.32924	0.0774973	0.0721564	4.80323	1.49027
2019	K + PCO	First_LeafRatio	C00_118364698	C00	118364698	0.0103734	1.12996e-05	0.353818	0.0820534	0.0742511	4.94694	1.72107
2017	K	HeadRatio	C00_118364756	C00	118364756	0.0223577	0.000863891	0.126355	0.0382432	0.0434049	3.06354	0.251622
2018	K	Second_LeafRatio	C00_118364756	C00	118364756	0.0571429	0.000488627	0.136446	0.0396508	0.0654288	3.31102	0.0515606
2019	K + PCO	Second_LeafRatio	C00_118364756	C00	118364756	0.0246914	0.000274955	0.151354	0.0420782	0.0518511	3.56074	0.288659
2019	K	Second_LeafRatio	C00_118364756	C00	118364756	0.0246914	0.000193548	0.150429	0.0408162	0.0543639	3.71321	0.285141
2019	K	First_LeafRatio	C00_118364756	C00	118364756	0.0228216	5.49311e-05	0.168392	0.0423288	0.0635584	4.26018	0.329267
2019	K + PCO	First_LeafRatio	C00_118364756	C00	118364756	0.0228216	2.76536e-05	0.182289	0.0441951	0.0681582	4.55825	0.385859
2017	K	HeadRatio	C00_118364761	C00	118364761	0.0223577	0.000863891	0.126355	0.0382432	0.0434049	3.06354	0.0173968
2018	K	Second_LeafRatio	C00_118364761	C00	118364761	0.0571429	0.000488627	0.136446	0.0396508	0.0654288	3.31102	0.0605949
2019	K + PCO	Second_LeafRatio	C00_118364761	C00	118364761	0.0246914	0.000274955	0.151354	0.0420782	0.0518511	3.56074	0.0217902
2019	K	Second_LeafRatio	C00_118364761	C00	118364761	0.0246914	0.000193548	0.150429	0.0408162	0.0543639	3.71321	0.0215246
2019	K	First_LeafRatio	C00_118364761	C00	118364761	0.0228216	5.49311e-05	0.168392	0.0423288	0.0635584	4.26018	0.025384
2019	K + PCO	First_LeafRatio	C00_118364761	C00	118364761	0.0228216	2.76536e-05	0.182289	0.0441951	0.0681582	4.55825	0.0297468
2019	K	First_LeafArea	C00_118787741	C00	118787741	0.40249	0.000870073	-51.3831	15.5636	0.0442198	3.06044	0.0382031
2017	K	LeafWidth	C00_118787741	C00	118787741	0.434028	0.000534246	-1.63615	0.476193	0.0401622	3.27226	0.0233158
2019	K	First_LeafLength	C00_118787741	C00	118787741	0.40249	0.000261125	-1.70855	0.473028	0.0526944	3.58315	0.0330278
2019	K	First_LeafWidth	C00_119423393	C00	119423393	0.0497925	0.00074826	-2.38186	0.712718	0.045285	3.12595	0.090108
2018	K	Second_LeafRatio	C00_119947965	C00	119947965	0.0457143	0.000181259	0.157957	0.0428661	0.0746575	3.7417	0.251577
2018	K	First_LeafRatio	C00_119947965	C00	119947965	0.0457143	8.28006e-05	0.148718	0.0384677	0.081862	4.08197	0.266
2018	K + PCO	First_LeafRatio	C00_121275067	C00	121275067	0.0657143	0.000719011	-0.106913	0.0320342	0.0616665	3.14326	0.139804
2018	K + PCO	Second_LeafRatio	C00_121275067	C00	121275067	0.0657143	0.000434142	-0.123345	0.0355794	0.0663708	3.36237	0.156004
2019	K + PCO	Head_Ratio	C00_122105268	C00	122105268	0.0627907	0.000728537	-0.0992496	0.0296891	0.050651	3.13755	0.0615767
2018	K	Second_LeafRatio	C00_122466101	C00	122466101	0.04	0.000967642	-0.13749	0.0421432	0.0590074	3.01429	0.0971911
2018	K + PCO	Second_LeafRatio	C00_122466101	C00	122466101	0.04	0.000814614	-0.134099	0.0405786	0.060498	3.08905	0.092457
2018	K + PCO	Second_LeafArea	C00_123696606	C00	123696606	0.168571	0.000636704	46.7348	13.8716	0.0628027	3.19606	0.0175961
2018	K + PCO	Second_LeafLength	C00_126417316	C00	126417316	0.0314286	0.000170693	4.82999	1.30769	0.0749939	3.76778	0.552359
2018	K + PCO	First_LeafLength	C00_126417316	C00	126417316	0.0314286	0.000108351	4.32085	1.13745	0.0791504	3.96517	0.555931
2017	K + PCO	HeadRatio	C00_131722223	C00	131722223	0.288618	0.000609789	0.0575546	0.0169542	0.0457656	3.21482	0.0153482
2017	K	HeadRatio	C00_131722223	C00	131722223	0.288618	0.000193588	0.0637942	0.0173072	0.0537321	3.71312	0.0188564
2019	K	First_LeafLength	C01_257934	C01	257934	0.342324	0.000704563	1.99149	0.593071	0.0457097	3.15208	0.0545868
2018	K	Second_LeafRatio	C01_1564195	C01	1564195	0.0314286	0.000120603	0.237018	0.062699	0.0784139	3.91864	0.109887
2017	K	LeafLength	C01_2508332	C01	2508332	0.279514	0.000877261	2.06582	0.625281	0.0371911	3.05687	0.0332046
2019	K	Second_LeafLength	C01_2508377	C01	2508377	0.0617284	0.000525366	3.64741	1.06177	0.0474028	3.27954	0.11074
2018	K + PCO	HeadRatio	C01_3683092	C01	3683092	0.0382166	0.000634881	-0.130805	0.0388845	0.0695402	3.19731	0.0902331
2019	K	First_LeafRatio	C01_3812955	C01	3812955	0.151452	0.00092467	0.0570312	0.0173609	0.0437899	3.03401	0.00528638
2018	K	First_LeafRatio	C01_3866832	C01	3866832	0.0428571	0.0002095	0.148414	0.0406573	0.0733173	3.67882	0.122182
2019	K	First_LeafRatio	C01_4147129	C01	4147129	0.026971	0.00075733	0.111957	0.033533	0.0451999	3.12071	0.0966441
2019	K	First_LeafRatio	C01_4147132	C01	4147132	0.026971	0.00075733	0.111957	0.033533	0.0451999	3.12071	0.105096
2019	K + PCO	Head_Width	C01_4808813	C01	4808813	0.0302326	0.000776907	3.63542	1.09305	0.0501494	3.10963	0.10138
2019	K + PCO	Head_Area	C01_4808813	C01	4808813	0.0302326	0.000638089	75.3539	22.3084	0.0516847	3.19512	0.136411
2019	K	Head_Area	C01_4808813	C01	4808813	0.0302326	0.000534532	72.9524	21.2903	0.0531461	3.27203	0.127855
2019	K	Head_Width	C01_4808813	C01	4808813	0.0302326	0.000274237	3.82361	1.06355	0.0583454	3.56187	0.112148
2017	K + PCO	HeadRatio	C01_5375113	C01	5375113	0.150407	0.000778347	-0.0653162	0.0196136	0.0440798	3.10883	0.0237679
2019	K + PCO	Head_Width	C01_5785217	C01	5785217	0.072093	0.000643667	2.50023	0.740689	0.0516169	3.19134	0.200948
2019	K + PCO	Head_Diameter	C01_5785217	C01	5785217	0.072093	0.000338682	2.14341	0.605547	0.0566085	3.47021	0.207788
2019	K	Head_Area	C01_5785217	C01	5785217	0.072093	2.82039e-06	59.9219	13.0799	0.0930033	5.54969	0.361485
2019	K + PCO	Head_Area	C01_5785217	C01	5785217	0.072093	1.76521e-07	76.427	15.0853	0.112534	6.7532	0.588048
2019	K	Head_Height	C01_5785217	C01	5785217	0.072093	1.64835e-08	2.88982	0.529343	0.129441	7.78295	0.543106
2019	K + PCO	Head_Height	C01_5785217	C01	5785217	0.072093	3.43001e-10	3.56905	0.594847	0.154172	9.4647	0.828418
2019	K + PCO	Head_Height	C01_5785220	C01	5785220	0.0790698	0.000190285	2.32721	0.632286	0.0610653	3.7206	0.352892
2019	K + PCO	Head_Height	C01_5790729	C01	5790729	0.0767442	0.000574481	1.82618	0.536296	0.0525028	3.24072	0.015975
2018	K + PCO	Second_LeafRatio	C01_7493062	C01	7493062	0.0285714	0.00036664	-0.181536	0.0517354	0.06794	3.43576	0.38457
2018	K	HeadRatio	C01_10949588	C01	10949588	0.022293	0.000482511	0.154486	0.0449202	0.0725673	3.31649	0.280934
2018	K + PCO	HeadRatio	C01_10949588	C01	10949588	0.022293	0.000414	0.165249	0.0475945	0.0739088	3.383	0.32144
2019	K	Head_Ratio	C01_11117294	C01	11117294	0.0232558	0.000671536	0.185832	0.0551925	0.0513623	3.17293	0.0479119
2017	K	HeadRatio	C01_11117294	C01	11117294	0.0162602	8.17316e-05	0.203542	0.0523348	0.059636	4.08761	0.0860384
2017	K + PCO	HeadRatio	C01_11117353	C01	11117353	0.0162602	0.000252874	0.175688	0.0485573	0.0518247	3.5971	0.0996867
2017	K	HeadRatio	C01_11117353	C01	11117353	0.0162602	4.86622e-05	0.193795	0.0483717	0.0631649	4.31281	0.121293
2019	K	Second_LeafRatio	C01_14977399	C01	14977399	0.238683	0.000944618	0.0630608	0.019229	0.0432936	3.02474	0.0431606
2019	K + PCO	Second_LeafRatio	C01_14977399	C01	14977399	0.238683	0.000566295	0.06838	0.0200315	0.0468223	3.24696	0.0507489
2018	K + PCO	HeadArea	C01_15081460	C01	15081460	0.101911	0.000991933	66.7697	20.5628	0.0649524	3.00352	0.0107272
2018	K + PCO	HeadArea	C01_15081477	C01	15081477	0.101911	0.000991933	66.7697	20.5628	0.0649524	3.00352	0.0242249
2018	K + PCO	HeadArea	C01_15081505	C01	15081505	0.101911	0.000991933	66.7697	20.5628	0.0649524	3.00352	0.00612065
2017	K	LeafArea	C01_15081505	C01	15081505	0.0885417	0.000614905	120.762	35.5293	0.0393203	3.21119	0.0121504
2017	K + PCO	LeafArea	C01_15081505	C01	15081505	0.0885417	0.000546003	124.591	36.3374	0.0399981	3.2628	0.0129331
2019	K + PCO	Second_LeafRatio	C01_15203112	C01	15203112	0.23251	0.000682817	0.0658866	0.0195827	0.0455161	3.1657	0.00788267
2017	K	HeadArea	C01_16318025	C01	16318025	0.0264228	0.000964232	56.2832	17.1899	0.042643	3.01582	0.107218
2017	K + PCO	HeadArea	C01_16318025	C01	16318025	0.0264228	0.000161817	62.5652	16.7899	0.0548829	3.79098	0.132488
2019	K	Head_Weight	C01_17081648	C01	17081648	0.169767	0.000935223	0.36136	0.110217	0.0487679	3.02908	0.157176
2019	K	Head_Weight	C01_17081659	C01	17081659	0.169767	0.000935223	0.36136	0.110217	0.0487679	3.02908	0.170763
2018	K	Second_LeafLength	C01_18499385	C01	18499385	0.04	0.000121532	4.59769	1.21681	0.0783434	3.91531	0.387139
2018	K + PCO	Second_LeafLength	C01_18499385	C01	18499385	0.04	5.65725e-05	5.0646	1.28419	0.0850428	4.24739	0.469763
2018	K + PCO	Second_LeafLength	C01_18551176	C01	18551176	0.0457143	0.000713963	3.77227	1.12966	0.0617324	3.14632	0.0942875
2017	K	LeafWidth	C01_19254971	C01	19254971	0.0711806	0.000670761	-3.93968	1.167	0.0387995	3.17343	0.21532
2017	K	LeafArea	C01_19254971	C01	19254971	0.0711806	0.000503442	-198.327	57.4628	0.0405177	3.29805	0.226198
2018	K	Second_LeafLength	C01_19722771	C01	19722771	0.0228571	0.000606961	4.66402	1.37765	0.0633958	3.21684	0.0698968
2018	K	Second_LeafLength	C01_19722797	C01	19722797	0.0228571	0.000606961	4.66402	1.37765	0.0633958	3.21684	0.476584
2019	K + PCO	First_LeafArea	C01_20702400	C01	20702400	0.26971	0.000484084	-118.518	34.3139	0.0482955	3.31508	0.0996572
2018	K	Second_LeafArea	C01_21898667	C01	21898667	0.0285714	0.000574064	106.29	31.2629	0.0639187	3.24104	0.283843
2017	K + PCO	HeadRatio	C01_21898667	C01	21898667	0.0243902	0.000397152	0.135947	0.0387829	0.0487217	3.40104	0.32435
2017	K	HeadRatio	C01_21898667	C01	21898667	0.0243902	0.000340657	0.138737	0.0391203	0.0498413	3.46768	0.337798
2018	K + PCO	Second_LeafArea	C01_21898667	C01	21898667	0.0285714	8.31614e-05	118.47	30.7035	0.0815568	4.08008	0.352621
2018	K	Second_LeafLength	C01_21898667	C01	21898667	0.0285714	6.32469e-05	4.52003	1.15123	0.0843202	4.19896	0.331231
2018	K + PCO	Second_LeafLength	C01_21898667	C01	21898667	0.0285714	2.15978e-05	4.85505	1.17033	0.0936599	4.66559	0.382153
2019	K + PCO	Second_LeafArea	C01_21900299	C01	21900299	0.0452675	0.000640461	155.996	46.1336	0.0459633	3.19351	0.033145
2019	K	First_LeafLength	C01_21900299	C01	21900299	0.0414938	0.000550112	4.31575	1.26081	0.047455	3.25955	0.0264264
2019	K + PCO	First_LeafLength	C01_21900299	C01	21900299	0.0414938	0.000300157	4.5554	1.27429	0.0516462	3.52265	0.0294428
2019	K	Second_LeafLength	C01_21900299	C01	21900299	0.0452675	1.31025e-05	5.58587	1.30298	0.0728419	4.88265	0.0359799
2019	K + PCO	Second_LeafLength	C01_21900299	C01	21900299	0.0452675	4.46889e-06	5.90015	1.3117	0.0798908	5.3498	0.0401423
2017	K + PCO	LeafWidth	C01_21900397	C01	21900397	0.276042	0.000982272	2.22651	0.68052	0.0364861	3.00777	0.00869135
2019	K	First_LeafLength	C01_21900397	C01	21900397	0.271784	0.00083439	2.20635	0.666014	0.0445156	3.07863	0.0209553
2019	K + PCO	Second_LeafLength	C01_21900397	C01	21900397	0.273663	0.000744258	2.5863	0.773952	0.0449142	3.12828	0.0228982
2019	K + PCO	First_LeafLength	C01_21900397	C01	21900397	0.271784	0.000720597	2.393	0.71433	0.0454985	3.14231	0.0246508
2017	K + PCO	LeafArea	C01_21900397	C01	21900397	0.276042	0.000642329	113.036	33.3835	0.039027	3.19224	0.00928624
2018	K + PCO	Second_LeafLength	C01_21953895	C01	21953895	0.0342857	0.000708522	3.60548	1.07906	0.0618039	3.14965	0.0328379
2019	K	First_LeafLength	C01_21953895	C01	21953895	0.0435685	0.000474667	4.16192	1.20245	0.0484942	3.32361	0.0755042
2019	K + PCO	First_LeafLength	C01_21953895	C01	21953895	0.0435685	0.000263602	4.38274	1.21506	0.0525546	3.57905	0.0837288
2019	K	Second_LeafLength	C01_21953895	C01	21953895	0.0452675	0.000105286	5.01327	1.30891	0.0585827	3.97763	0.0870718
2019	K + PCO	Second_LeafLength	C01_21953895	C01	21953895	0.0452675	4.26935e-05	5.31784	1.31927	0.0646779	4.36964	0.0979732
2019	K + PCO	Second_LeafArea	C01_22013677	C01	22013677	0.0452675	0.000640461	155.996	46.1336	0.0459633	3.19351	0.094364
2019	K	First_LeafLength	C01_22013677	C01	22013677	0.0414938	0.000550112	4.31575	1.26081	0.047455	3.25955	0.0786879
2019	K + PCO	First_LeafLength	C01_22013677	C01	22013677	0.0414938	0.000300157	4.5554	1.27429	0.0516462	3.52265	0.0876695
2019	K	Second_LeafLength	C01_22013677	C01	22013677	0.0452675	1.31025e-05	5.58587	1.30298	0.0728419	4.88265	0.102435
2019	K + PCO	Second_LeafLength	C01_22013677	C01	22013677	0.0452675	4.46889e-06	5.90015	1.3117	0.0798908	5.3498	0.114285
2019	K + PCO	Second_LeafArea	C01_22013737	C01	22013737	0.0452675	0.000640461	155.996	46.1336	0.0459633	3.19351	0.236765
2019	K	First_LeafLength	C01_22013737	C01	22013737	0.0414938	0.000550112	4.31575	1.26081	0.047455	3.25955	0.19696
2019	K + PCO	First_LeafLength	C01_22013737	C01	22013737	0.0414938	0.000300157	4.5554	1.27429	0.0516462	3.52265	0.219442
2019	K	Second_LeafLength	C01_22013737	C01	22013737	0.0452675	1.31025e-05	5.58587	1.30298	0.0728419	4.88265	0.257015
2019	K + PCO	Second_LeafLength	C01_22013737	C01	22013737	0.0452675	4.46889e-06	5.90015	1.3117	0.0798908	5.3498	0.286749
2019	K	First_LeafLength	C01_22034779	C01	22034779	0.0394191	0.000896245	4.13846	1.25656	0.0440105	3.04757	0.115337
2019	K + PCO	First_LeafLength	C01_22034779	C01	22034779	0.0394191	0.000531192	4.30028	1.25374	0.0476432	3.27475	0.124532
2019	K + PCO	Second_LeafArea	C01_22034779	C01	22034779	0.0432099	0.000495882	156.06	45.2604	0.0477482	3.30462	0.150458
2019	K	Second_LeafLength	C01_22034779	C01	22034779	0.0432099	1.61921e-05	5.47347	1.29002	0.0714071	4.7907	0.156693
2019	K + PCO	Second_LeafLength	C01_22034779	C01	22034779	0.0432099	6.09799e-06	5.6945	1.28343	0.0778193	5.21481	0.169603
2019	K	First_LeafLength	C01_22034781	C01	22034781	0.0373444	0.000762481	4.4433	1.33156	0.0451521	3.11777	0.126829
2019	K + PCO	First_LeafLength	C01_22034781	C01	22034781	0.0373444	0.000410749	4.63435	1.32563	0.0494484	3.38642	0.13797
2019	K	Second_LeafLength	C01_22034781	C01	22034781	0.0390947	0.000249776	5.21129	1.4383	0.0525906	3.60245	0.135331
2019	K + PCO	Second_LeafLength	C01_22034781	C01	22034781	0.0390947	9.95254e-05	5.48513	1.42842	0.0588766	4.00207	0.149926
2017	K	HeadHeight	C01_22090225	C01	22090225	0.0325203	0.000803828	2.00567	0.603507	0.0439044	3.09484	0.0344723
2017	K + PCO	HeadHeight	C01_22090225	C01	22090225	0.0325203	0.000613726	1.95881	0.577304	0.0457212	3.21203	0.0328801
2019	K + PCO	Second_LeafWidth	C01_22090225	C01	22090225	0.0493827	0.00053904	2.99879	0.875189	0.0471663	3.26838	0.0878785
2019	K	Second_LeafArea	C01_22090225	C01	22090225	0.0493827	0.000161862	151.314	40.5824	0.0556049	3.79085	0.101159
2019	K + PCO	Head_Ratio	C01_22090225	C01	22090225	0.0372093	5.57702e-05	0.1557	0.0392834	0.0704614	4.2536	0.11681
2019	K	Head_Ratio	C01_22090225	C01	22090225	0.0372093	4.20486e-05	0.157918	0.0391807	0.0727743	4.37625	0.120162
2019	K	First_LeafLength	C01_22090225	C01	22090225	0.0456432	2.56622e-05	4.62998	1.11704	0.0688048	4.59071	0.102347
2019	K + PCO	Second_LeafArea	C01_22090225	C01	22090225	0.0493827	2.32045e-05	173.192	41.6056	0.0688258	4.63443	0.132526
2019	K + PCO	First_LeafLength	C01_22090225	C01	22090225	0.0456432	9.34454e-06	4.89847	1.12591	0.0755363	5.02944	0.114561
2019	K	Second_LeafLength	C01_22090225	C01	22090225	0.0493827	1.83921e-06	5.43018	1.16175	0.0859849	5.73537	0.110297
2019	K + PCO	Second_LeafLength	C01_22090225	C01	22090225	0.0493827	5.24783e-07	5.71047	1.16626	0.0939497	6.28002	0.121977
2017	K + PCO	HeadRatio	C01_22090225	C01	22090225	0.0325203	2.51216e-07	0.15979	0.0317882	0.097615	6.59995	0.0537878
2017	K	HeadRatio	C01_22090225	C01	22090225	0.0325203	1.92489e-07	0.163696	0.0322211	0.0996032	6.71559	0.0564495
2017	K + PCO	HeadRatio	C01_22090269	C01	22090269	0.0873984	0.000188136	0.0712174	0.0192991	0.0538518	3.72553	0.0655215
2019	K + PCO	Second_LeafLength	C01_22090269	C01	22090269	0.109053	0.000178118	2.97518	0.803496	0.0548601	3.74929	0.0288391
2017	K	HeadRatio	C01_22090269	C01	22090269	0.0873984	9.28062e-05	0.074998	0.0194297	0.0587687	4.03242	0.0726625
2019	K	Second_LeafLength	C01_22090269	C01	22090269	0.109053	6.87676e-05	3.11781	0.793739	0.061521	4.16262	0.0316706
2019	K	First_LeafLength	C01_22090293	C01	22090293	0.0497925	0.000736727	3.51616	1.05083	0.0453946	3.13269	0.0248278
2019	K + PCO	Second_LeafWidth	C01_22090293	C01	22090293	0.0534979	0.000704514	2.81164	0.837732	0.0452976	3.15211	0.0321735
2019	K + PCO	First_LeafLength	C01_22090293	C01	22090293	0.0497925	0.000405599	3.7047	1.05874	0.0495369	3.3919	0.0275618
2019	K	Second_LeafArea	C01_22090293	C01	22090293	0.0534979	0.000189505	143.912	38.9939	0.0545106	3.72238	0.0381093
2019	K + PCO	Head_Ratio	C01_22090293	C01	22090293	0.0418605	5.40084e-05	0.140771	0.0354531	0.0707053	4.26754	0.0381933
2019	K	Head_Ratio	C01_22090293	C01	22090293	0.0418605	3.87536e-05	0.143722	0.0355015	0.0733954	4.41169	0.0398117
2019	K + PCO	Second_LeafArea	C01_22090293	C01	22090293	0.0534979	3.2782e-05	163.371	39.9582	0.0664784	4.48436	0.0491117
2019	K	Second_LeafLength	C01_22090293	C01	22090293	0.0534979	5.68231e-06	4.88132	1.09539	0.0784708	5.24547	0.0371191
2019	K + PCO	Second_LeafLength	C01_22090293	C01	22090293	0.0534979	2.21377e-06	5.09377	1.09945	0.0845435	5.65487	0.0404206
2017	K + PCO	HeadRatio	C01_22090293	C01	22090293	0.0365854	1.99027e-06	0.13332	0.028644	0.0842956	5.70109	0.13767
2017	K	HeadRatio	C01_22090293	C01	22090293	0.0365854	1.64261e-06	0.136825	0.029133	0.0857626	5.78446	0.145004
2017	K + PCO	HeadRatio	C01_22090298	C01	22090298	0.0873984	0.000214472	0.0696734	0.0190444	0.0529543	3.66863	0.0375997
2019	K + PCO	Second_LeafLength	C01_22090298	C01	22090298	0.111111	0.000149904	2.94749	0.787264	0.0560523	3.82419	0.0858735
2017	K	HeadRatio	C01_22090298	C01	22090298	0.0873984	0.000107715	0.0735144	0.0192176	0.0577506	3.96772	0.0418596
2019	K	Second_LeafLength	C01_22090298	C01	22090298	0.111111	5.74086e-05	3.09073	0.778765	0.0627629	4.24102	0.0944222
2018	K	Second_LeafRatio	C01_22353232	C01	22353232	0.0685714	0.0006588	0.124597	0.0370361	0.0626262	3.18125	0.0165375
2018	K	First_LeafRatio	C01_22353232	C01	22353232	0.0685714	0.000535556	0.113592	0.0332359	0.0645697	3.27119	0.0163952
2017	K + PCO	HeadRatio	C01_22353232	C01	22353232	0.0386179	0.000197316	0.119007	0.0323503	0.0535256	3.70484	0.0318657
2019	K	First_LeafLength	C01_22353232	C01	22353232	0.0477178	0.000166906	4.39362	1.18081	0.0558282	3.77753	0.0978971
2017	K	HeadRatio	C01_22353232	C01	22353232	0.0386179	0.000124356	0.12222	0.0322337	0.0567677	3.90533	0.0336096
2019	K + PCO	First_LeafLength	C01_22353232	C01	22353232	0.0477178	7.20069e-05	4.7813	1.2217	0.0615769	4.14263	0.115935
2019	K	Second_LeafLength	C01_22353232	C01	22353232	0.0514403	1.28624e-05	5.29181	1.23328	0.072967	4.89068	0.110215
2019	K + PCO	Second_LeafLength	C01_22353232	C01	22353232	0.0514403	4.10727e-06	5.72242	1.26755	0.0804519	5.38645	0.128882
2019	K	Second_LeafLength	C01_22392742	C01	22392742	0.037037	4.9331e-05	5.49727	1.37341	0.0638044	4.30688	0.147518
2019	K + PCO	Second_LeafLength	C01_22392742	C01	22392742	0.037037	2.25551e-05	5.80688	1.39296	0.0690183	4.64676	0.164602
2019	K	Second_LeafLength	C01_22392759	C01	22392759	0.0534979	0.000126402	4.48092	1.18315	0.0573184	3.89825	0.0901323
2019	K + PCO	Second_LeafLength	C01_22392759	C01	22392759	0.0534979	5.5188e-05	4.80685	1.20958	0.0629236	4.25816	0.103721
2018	K	Second_LeafWidth	C01_24619264	C01	24619264	0.0314286	0.000624929	-3.7184	1.1008	0.063122	3.20417	0.485032
2018	K	Second_LeafRatio	C01_24619264	C01	24619264	0.0314286	1.26732e-05	0.269475	0.0631654	0.0987763	4.89711	0.618934
2018	K	First_LeafRatio	C01_24619264	C01	24619264	0.0314286	6.97233e-06	0.248559	0.0566842	0.104053	5.15662	0.628098
2018	K	Second_LeafWidth	C01_25232296	C01	25232296	0.0571429	0.000998562	-2.30705	0.708996	0.0587107	3.00062	0.203037
2017	K + PCO	HeadRatio	C01_26216694	C01	26216694	0.0142276	0.0001895	0.19817	0.053727	0.0538023	3.72239	0.76953
2017	K	HeadRatio	C01_26216694	C01	26216694	0.0142276	7.00283e-05	0.212226	0.0540768	0.0606895	4.15473	0.882564
2019	K	Second_LeafRatio	C01_26433304	C01	26433304	0.0185185	0.000742511	0.142204	0.0425222	0.0449812	3.1293	0.340849
2019	K + PCO	Head_Ratio	C01_26433304	C01	26433304	0.0139535	0.000335869	0.239082	0.0675048	0.0566731	3.47383	0.75944
2019	K	Head_Ratio	C01_26433304	C01	26433304	0.0139535	0.000156299	0.254478	0.0682024	0.0627012	3.80604	0.8604
2019	K + PCO	First_LeafRatio	C01_26433304	C01	26433304	0.0165975	1.6746e-05	0.190766	0.0450901	0.0715806	4.77609	0.575145
2019	K	First_LeafRatio	C01_26433304	C01	26433304	0.0165975	1.5474e-05	0.194192	0.0456723	0.0722691	4.8104	0.595986
2017	K + PCO	HeadRatio	C01_26433304	C01	26433304	0.0121951	1.44091e-05	0.227228	0.0532943	0.0712329	4.84136	1.03219
2017	K	HeadRatio	C01_26433304	C01	26433304	0.0121951	4.18372e-06	0.246144	0.054486	0.0796133	5.37844	1.2112
2017	K + PCO	LeafLength	C01_29471433	C01	29471433	0.09375	4.2445e-05	4.80816	1.18946	0.0551571	4.37217	0.112865
2017	K	LeafLength	C01_29471433	C01	29471433	0.09375	3.72671e-05	4.70272	1.15438	0.0559953	4.42867	0.107969
2017	K + PCO	LeafWidth	C01_35025942	C01	35025942	0.0434028	0.000279234	4.93704	1.37145	0.0439993	3.55403	0.15913
2017	K	LeafRatio	C01_35180583	C01	35180583	0.241319	0.000845855	-0.0725898	0.0219059	0.0374096	3.0727	0.0139887
2019	K	Second_LeafLength	C01_35367414	C01	35367414	0.090535	0.00037086	2.91335	0.826592	0.0498359	3.43079	0.0908214
2019	K + PCO	Second_LeafLength	C01_35367414	C01	35367414	0.090535	0.000152214	3.08652	0.825199	0.0559467	3.81755	0.10194
2017	K + PCO	HeadRatio	C01_35566651	C01	35566651	0.0487805	0.000919195	0.0684515	0.0208348	0.0429298	3.03659	0.0341863
2017	K + PCO	HeadWidth	C01_35572099	C01	35572099	0.0325203	0.000954675	2.06819	0.631475	0.0426678	3.02014	0.0893485
2017	K	HeadArea	C01_35572099	C01	35572099	0.0325203	2.32613e-05	64.3555	15.4433	0.0681577	4.63337	0.176285
2017	K + PCO	HeadArea	C01_35572099	C01	35572099	0.0325203	6.22962e-06	66.8622	15.0801	0.0768036	5.20554	0.190286
2019	K	Leaf_Number	C01_35666754	C01	35666754	0.027907	0.000886797	6.35184	1.92891	0.0491848	3.05218	0.119595
2019	K	Head_Width	C01_35869570	C01	35869570	0.027907	0.000817602	3.17218	0.956987	0.0498214	3.08746	0.184279
2019	K	Head_Width	C01_35869578	C01	35869578	0.027907	0.000817602	3.17218	0.956987	0.0498214	3.08746	0.266566
2018	K	Second_LeafLength	C01_36101640	C01	36101640	0.105714	0.000954399	2.58862	0.792562	0.0591374	3.02027	0.168815
2018	K	Second_LeafLength	C01_36101657	C01	36101657	0.128571	0.000800051	2.40349	0.725436	0.0607995	3.09688	0.148291
2018	K	Second_LeafLength	C01_36101735	C01	36101735	0.105714	0.000954399	2.58862	0.792562	0.0591374	3.02027	0.0228518
2018	K	Second_LeafLength	C01_36101747	C01	36101747	0.105714	0.000954399	2.58862	0.792562	0.0591374	3.02027	0.025814
2019	K	Second_LeafRatio	C01_37407625	C01	37407625	0.026749	0.000470543	0.138835	0.0400826	0.0481733	3.3274	0.0519821
2019	K + PCO	Second_LeafRatio	C01_37407625	C01	37407625	0.026749	0.00024504	0.142332	0.0392602	0.0526505	3.61076	0.0546335
2019	K + PCO	Leaf_Number	C01_37980289	C01	37980289	0.153488	2.86921e-06	3.60744	0.789312	0.0925844	5.54224	0.0703428
2019	K	Leaf_Number	C01_37980289	C01	37980289	0.153488	1.32642e-06	3.70227	0.784006	0.0985213	5.87732	0.0740893
2018	K + PCO	First_LeafRatio	C02_819209	C02	819209	0.0514286	0.000591404	-0.108549	0.032038	0.0634917	3.22812	0.0822961
2018	K + PCO	First_LeafWidth	C02_821698	C02	821698	0.0514286	0.000865544	1.7574	0.534386	0.0599299	3.06271	0.22655
2018	K + PCO	Second_LeafRatio	C02_821698	C02	821698	0.0514286	0.00034081	-0.120784	0.0342454	0.0686173	3.46749	0.188362
2018	K + PCO	First_LeafRatio	C02_821698	C02	821698	0.0514286	7.62002e-05	-0.119572	0.030833	0.0823497	4.11804	0.22019
2018	K	Second_LeafWidth	C02_1098737	C02	1098737	0.0342857	0.000403355	-3.42229	0.980683	0.0672225	3.39431	0.0513501
2018	K	First_LeafRatio	C02_1098737	C02	1098737	0.0342857	0.000204742	0.182789	0.0499988	0.0735301	3.68879	0.0424543
2018	K	Second_LeafRatio	C02_1098737	C02	1098737	0.0342857	2.54011e-06	0.255044	0.0557157	0.112849	5.59515	0.0692929
2018	K	Second_LeafRatio	C02_1098796	C02	1098796	0.0285714	0.000529737	0.204732	0.0598534	0.0646722	3.27594	0.0643125
2018	K	First_LeafRatio	C02_1098796	C02	1098796	0.0285714	0.000494368	0.184674	0.053712	0.0653195	3.30595	0.0624161
2018	K	Second_LeafRatio	C02_1098807	C02	1098807	0.04	3.62366e-05	0.20977	0.0518253	0.0893708	4.44085	0.112766
2019	K + PCO	Head_Weight	C02_1410548	C02	1410548	0.386047	0.000440454	-0.254559	0.0732877	0.0545693	3.3561	0.0303666
2019	K	Head_Weight	C02_1410548	C02	1410548	0.386047	0.000223393	-0.248664	0.0682134	0.0599368	3.65093	0.0289763
2018	K	First_LeafWidth	C02_1410575	C02	1410575	0.425714	0.000801668	-0.987792	0.298189	0.0607805	3.09601	0.0139753
2018	K	Second_LeafWidth	C02_1410575	C02	1410575	0.425714	0.000540274	-1.14062	0.333953	0.0644875	3.26739	0.0134993
2018	K	First_LeafRatio	C02_1419010	C02	1419010	0.0771429	0.000418984	0.106223	0.0305225	0.0668673	3.3778	0.106127
2018	K	Second_LeafRatio	C02_1419010	C02	1419010	0.0771429	0.000116021	0.12888	0.0340125	0.07877	3.93547	0.130978
2019	K + PCO	Leaf_Number	C02_1635082	C02	1635082	0.174419	0.000707577	2.3214	0.692815	0.0508788	3.15023	0.00738437
2019	K	Leaf_Number	C02_1635082	C02	1635082	0.174419	0.000586917	2.35611	0.692512	0.0524156	3.23142	0.00760688
2018	K	Second_LeafRatio	C02_2746960	C02	2746960	0.0457143	5.31575e-05	0.192643	0.0485912	0.0859008	4.27444	0.188749
2018	K	First_LeafRatio	C02_2746960	C02	2746960	0.0457143	1.67374e-05	0.18356	0.0436054	0.0963017	4.77631	0.204407
2018	K	Second_LeafArea	C02_3504558	C02	3504558	0.0257143	0.000211563	-128.744	35.2915	0.0732265	3.67456	0.118545
2018	K + PCO	Second_LeafArea	C02_3504558	C02	3504558	0.0257143	0.00015308	-133.6	35.9233	0.0759924	3.81508	0.127655
2018	K	HeadArea	C02_3663650	C02	3663650	0.0286624	0.000953099	118.756	36.4037	0.0655364	3.02086	0.435184
2017	K + PCO	HeadArea	C02_3786725	C02	3786725	0.050813	0.000317083	43.9035	12.3253	0.0502706	3.49883	0.260358
2017	K	HeadArea	C02_3786725	C02	3786725	0.050813	0.000132348	47.4012	12.55	0.0563411	3.87828	0.303495
2018	K + PCO	Second_LeafWidth	C02_7356140	C02	7356140	0.0628571	0.000851827	1.9072	0.579191	0.0600796	3.06965	0.0497288
2018	K + PCO	First_LeafRatio	C02_7356140	C02	7356140	0.0628571	0.000351056	-0.102414	0.0290975	0.0683428	3.45462	0.0415575
2018	K + PCO	Second_LeafRatio	C02_7356140	C02	7356140	0.0628571	0.000262454	-0.116049	0.0323177	0.0710338	3.58095	0.0447353
2019	K + PCO	Second_LeafRatio	C02_8591916	C02	8591916	0.160494	0.000280135	-0.062732	0.0174626	0.0517216	3.55263	0.0683907
2019	K + PCO	First_LeafLength	C02_10480330	C02	10480330	0.0248963	0.00088601	-4.36816	1.3258	0.0440432	3.05256	0.0314138
2019	K	Head_Area	C02_13306406	C02	13306406	0.42093	0.00082287	-20.8219	6.28483	0.0497711	3.08467	0.028404
2017	K + PCO	LeafRatio	C02_14487150	C02	14487150	0.0381944	7.62477e-05	0.206166	0.052726	0.051703	4.11777	0.313264
2017	K	LeafRatio	C02_14487150	C02	14487150	0.0381944	3.59267e-05	0.214566	0.0525657	0.0562112	4.44458	0.339312
2019	K + PCO	Leaf_Number	C02_17896459	C02	17896459	0.390698	0.000221098	2.32042	0.636699	0.0599075	3.65541	0.0593485
2019	K	Leaf_Number	C02_17896459	C02	17896459	0.390698	4.6919e-05	2.53926	0.633796	0.0719392	4.32865	0.0710706
2017	K	LeafLength	C02_19035634	C02	19035634	0.286458	0.000926913	2.23213	0.678696	0.0368611	3.03296	0.00640503
2017	K + PCO	LeafArea	C02_19035634	C02	19035634	0.286458	0.00074212	92.3842	27.5973	0.0381635	3.12953	0.00743892
2017	K	LeafArea	C02_19035634	C02	19035634	0.286458	0.000420846	94.1869	26.928	0.04159	3.37588	0.00773206
2017	K	HeadArea	C02_19957534	C02	19957534	0.227642	0.000602279	25.8492	7.6028	0.0459037	3.2202	0.0635652
2017	K + PCO	HeadArea	C02_19957534	C02	19957534	0.227642	0.000406931	26.8265	7.66657	0.0485542	3.39048	0.0684625
2018	K + PCO	Second_LeafWidth	C02_20386733	C02	20386733	0.0342857	0.000764527	-2.76971	0.833901	0.0610922	3.11661	0.0859818
2018	K	Second_LeafRatio	C02_20386733	C02	20386733	0.0342857	0.0004126	0.170627	0.0489743	0.0670108	3.38447	0.0792829
2018	K	First_LeafRatio	C02_20386733	C02	20386733	0.0342857	0.000141238	0.164528	0.0439491	0.0769602	3.85005	0.0879281
2018	K	Second_LeafWidth	C02_20386733	C02	20386733	0.0342857	0.000131093	-3.2422	0.86207	0.0776467	3.88242	0.117819
2018	K + PCO	HeadRatio	C02_21234847	C02	21234847	0.066879	0.000815991	0.11655	0.0353316	0.0669633	3.08831	0.0278969
2018	K + PCO	HeadRatio	C02_21483453	C02	21483453	0.490446	0.000574754	-0.0461662	0.0136207	0.0705593	3.24052	0.0678069
2018	K + PCO	HeadRatio	C02_21483456	C02	21483456	0.487261	0.000594715	-0.0453627	0.0134182	0.0702098	3.22569	0.00755483
2018	K + PCO	HeadRatio	C02_21483500	C02	21483500	0.490446	0.000566891	-0.0459458	0.0135417	0.0707002	3.2465	0.0527585
2018	K + PCO	First_LeafRatio	C02_21513601	C02	21513601	0.105714	0.000643871	-0.08438	0.0250669	0.0626982	3.1912	0.0282789
2018	K + PCO	First_LeafLength	C02_21513601	C02	21513601	0.105714	0.000602764	-2.11272	0.624468	0.0633142	3.21985	0.040868
2018	K + PCO	Second_LeafLength	C02_21513601	C02	21513601	0.105714	0.000402194	-2.50264	0.717933	0.067081	3.39556	0.0455974
2018	K	First_LeafLength	C02_21513601	C02	21513601	0.105714	0.000254154	-2.15403	0.597717	0.071525	3.5949	0.0424815
2018	K	Second_LeafLength	C02_21513601	C02	21513601	0.105714	0.00017013	-2.53559	0.685314	0.0752431	3.76922	0.0468061
2018	K + PCO	Second_LeafRatio	C02_21513601	C02	21513601	0.105714	0.000135007	-0.104354	0.0278411	0.0771423	3.86964	0.036261
2018	K + PCO	HeadRatio	C02_22227725	C02	22227725	0.066879	0.000815991	0.11655	0.0353316	0.0669633	3.08831	0.0451961
2018	K + PCO	HeadRatio	C02_22589264	C02	22589264	0.066879	0.000815991	0.11655	0.0353316	0.0669633	3.08831	0.272268
2018	K	HeadRatio	C02_22618397	C02	22618397	0.452229	8.5316e-05	-0.0633007	0.0164361	0.0901505	4.06897	0.030648
2018	K + PCO	HeadRatio	C02_22618397	C02	22618397	0.452229	5.58147e-05	-0.0761973	0.0193577	0.0939759	4.25325	0.0444083
2018	K	Second_LeafRatio	C02_23891559	C02	23891559	0.06	0.000159475	0.137819	0.0370965	0.0758403	3.79731	0.0394359
2018	K	First_LeafRatio	C02_23891559	C02	23891559	0.06	0.00012467	0.12559	0.0332901	0.078109	3.90424	0.0390613
2018	K	Second_LeafRatio	C02_24035327	C02	24035327	0.0628571	0.000180257	0.130809	0.035486	0.0747087	3.74411	0.171839
2018	K	First_LeafRatio	C02_24035327	C02	24035327	0.0628571	0.00013439	0.119583	0.0318448	0.077418	3.87163	0.171296
2017	K + PCO	HeadArea	C02_24035391	C02	24035391	0.105691	0.000794173	-32.8898	9.89236	0.0439407	3.10008	0.0131335
2017	K	HeadWidth	C02_24035391	C02	24035391	0.105691	0.000448786	-1.47361	0.4239	0.047938	3.34796	0.0129386
2017	K	HeadArea	C02_24035391	C02	24035391	0.105691	9.70311e-05	-38.9898	10.1281	0.0584646	4.01309	0.018457
2017	K	HeadWidth	C02_25031037	C02	25031037	0.0386179	0.000513913	-2.13142	0.619356	0.0470013	3.28911	0.202654
2018	K + PCO	HeadRatio	C02_25031037	C02	25031037	0.0541401	0.000409505	0.134024	0.038571	0.07402	3.38774	0.581357
2019	K	Leaf_Number	C02_25994225	C02	25994225	0.0511628	0.00025088	4.57291	1.26427	0.0590366	3.60053	0.0516948
2019	K + PCO	Head_Ratio	C02_27502088	C02	27502088	0.355814	0.00025966	-0.155173	0.0430402	0.0586655	3.58559	0.106532
2017	K	HeadWidth	C02_27594027	C02	27594027	0.0426829	0.000507294	-1.97621	0.573693	0.047091	3.29474	0.115218
2017	K	HeadWidth	C02_27594102	C02	27594102	0.0426829	0.000507294	-1.97621	0.573693	0.047091	3.29474	0.0888144
2017	K + PCO	LeafRatio	C02_31992416	C02	31992416	0.0295139	0.000556841	0.192158	0.0561277	0.0398806	3.25427	0.0519759
2017	K	LeafRatio	C02_31992416	C02	31992416	0.0295139	0.000156911	0.198412	0.0530111	0.0474779	3.80435	0.0554145
2018	K	Second_LeafRatio	C02_32391274	C02	32391274	0.28	0.000700698	0.0664779	0.0198555	0.0620468	3.15447	0.0176157
2018	K + PCO	Second_LeafRatio	C02_32391274	C02	32391274	0.28	0.000362806	0.0663073	0.0188826	0.0680375	3.44033	0.0175254
2019	K + PCO	Head_Width	C02_32676855	C02	32676855	0.0953488	0.000783126	-1.98939	0.598524	0.0500872	3.10617	0.118654
2019	K	Head_Diameter	C02_32676855	C02	32676855	0.0953488	0.000652828	-1.60693	0.47621	0.0515833	3.1852	0.108924
2019	K + PCO	Head_Diameter	C02_32676855	C02	32676855	0.0953488	0.000324991	-1.72607	0.486231	0.0569283	3.48813	0.125674
2018	K + PCO	HeadRatio	C02_33640743	C02	33640743	0.0254777	0.000677161	0.155835	0.0465553	0.0688791	3.16931	0.124542
2018	K	HeadRatio	C02_33640743	C02	33640743	0.0254777	0.000460957	0.15295	0.0443247	0.0730371	3.33634	0.119973
2019	K	Head_Height	C02_34081891	C02	34081891	0.0302326	0.000978146	2.5849	0.791341	0.048416	3.0096	0.0427895
2019	K + PCO	Head_Height	C02_34081891	C02	34081891	0.0302326	0.000811154	2.70852	0.817182	0.0498127	3.0909	0.0469802
2019	K + PCO	Head_Height	C02_34081920	C02	34081920	0.0139535	0.000204364	4.3212	1.17954	0.0605149	3.6896	1.15371
2019	K	Head_Height	C02_34081920	C02	34081920	0.0139535	0.000201085	4.23834	1.15459	0.0607521	3.69662	1.10989
2019	K + PCO	Head_Area	C02_34081920	C02	34081920	0.0139535	4.36356e-06	132.952	29.6095	0.089513	5.36016	1.69065
2019	K	Head_Area	C02_34081920	C02	34081920	0.0139535	3.08904e-06	130.03	28.4912	0.0923339	5.51018	1.61715
2018	K	HeadHeight	C02_35823404	C02	35823404	0.0382166	0.000665277	4.11616	1.22621	0.0692575	3.177	0.410293
2019	K + PCO	Head_Weight	C02_36119034	C02	36119034	0.0976744	0.000533196	-0.340715	0.0994942	0.0530834	3.27311	0.167412
2018	K	Second_LeafRatio	C02_39349473	C02	39349473	0.0285714	0.000788125	0.191832	0.0578305	0.0609408	3.1034	0.323644
2017	K	HeadArea	C02_41884716	C02	41884716	0.345528	0.0009386	21.8746	6.66598	0.0428298	3.02752	0.0624941
2019	K + PCO	Head_Diameter	C02_41884716	C02	41884716	0.353488	0.000733465	1.15584	0.345938	0.0505985	3.13462	0.0195357
2017	K + PCO	HeadHeight	C02_41884716	C02	41884716	0.345528	0.000453836	0.90589	0.260967	0.0478027	3.3431	0.0725917
2017	K	HeadHeight	C02_41884716	C02	41884716	0.345528	4.21842e-05	1.05099	0.260273	0.064134	4.37485	0.0977084
2019	K + PCO	Head_Ratio	C02_42038487	C02	42038487	0.0837209	0.000893802	-0.086372	0.0262648	0.0490549	3.04876	0.120949
2019	K	Head_Ratio	C02_42038487	C02	42038487	0.0837209	0.000828813	-0.0884428	0.0267109	0.0497147	3.08154	0.126818
2017	K + PCO	HeadArea	C03_1247010	C03	1247010	0.172764	0.000454741	-25.9101	7.46521	0.047789	3.34224	0.0774268
2017	K	HeadHeight	C03_1247010	C03	1247010	0.172764	0.000391887	-1.03594	0.295058	0.0488745	3.40684	0.0838301
2017	K + PCO	HeadHeight	C03_1247010	C03	1247010	0.172764	3.18909e-05	-1.17185	0.286142	0.0659065	4.49633	0.10727
2017	K + PCO	HeadArea	C03_1352823	C03	1352823	0.164634	0.000588915	-26.9852	7.92788	0.046006	3.22995	0.0446326
2017	K	HeadArea	C03_1352823	C03	1352823	0.164634	0.000376232	-28.673	8.1427	0.0491559	3.42454	0.0503905
2019	K + PCO	First_LeafWidth	C03_1763045	C03	1763045	0.211618	0.000832275	1.59589	0.481915	0.0444839	3.07973	0.0309932
2017	K	LeafWidth	C03_1763045	C03	1763045	0.204861	0.00032636	2.17082	0.609357	0.0431101	3.4863	0.0374565
2017	K	HeadHeight	C03_1763045	C03	1763045	0.20935	0.000265405	1.06301	0.294567	0.0515618	3.57609	0.0432569
2017	K	HeadArea	C03_1763045	C03	1763045	0.20935	0.000248341	27.3031	7.5316	0.0520193	3.60495	0.0421333
2017	K + PCO	LeafWidth	C03_1763045	C03	1763045	0.204861	0.000204939	2.27184	0.617991	0.0458406	3.68837	0.0410237
2017	K	LeafArea	C03_1763045	C03	1763045	0.204861	0.00016393	110.524	29.6129	0.0472174	3.78534	0.0402494
2017	K + PCO	LeafArea	C03_1763045	C03	1763045	0.204861	7.64538e-05	117.579	30.075	0.0516871	4.1166	0.0455512
2017	K + PCO	HeadArea	C03_1763045	C03	1763045	0.20935	5.03349e-05	29.9785	7.5035	0.0628265	4.29813	0.0507951
2017	K + PCO	HeadHeight	C03_1763045	C03	1763045	0.20935	1.79401e-05	1.21284	0.287542	0.069768	4.74618	0.05631
2018	K	Second_LeafArea	C03_2333663	C03	2333663	0.311429	0.00052911	-45.7344	13.3693	0.0646832	3.27645	0.0231473
2018	K + PCO	Second_LeafLength	C03_2333663	C03	2333663	0.311429	0.000382176	-1.78009	0.508796	0.067555	3.41774	0.0226286
2018	K	Second_LeafLength	C03_2333663	C03	2333663	0.311429	0.000281287	-1.74095	0.48643	0.0705823	3.55085	0.0216445
2018	K	Second_LeafArea	C03_2333664	C03	2333664	0.311429	0.00052911	-45.7344	13.3693	0.0646832	3.27645	0.0935227
2018	K + PCO	Second_LeafLength	C03_2333664	C03	2333664	0.311429	0.000382176	-1.78009	0.508796	0.067555	3.41774	0.0914271
2018	K	Second_LeafLength	C03_2333664	C03	2333664	0.311429	0.000281287	-1.74095	0.48643	0.0705823	3.55085	0.0874507
2019	K + PCO	Leaf_Number	C03_3251174	C03	3251174	0.0372093	9.35281e-05	6.07011	1.57788	0.066519	4.02906	0.23135
2019	K	Leaf_Number	C03_3251174	C03	3251174	0.0372093	3.87029e-05	6.35202	1.56893	0.0734054	4.41226	0.253338
2018	K + PCO	Second_LeafLength	C03_3671710	C03	3671710	0.06	0.000209674	-3.41403	0.936676	0.0731036	3.67846	0.241435
2018	K	Second_LeafLength	C03_3671710	C03	3671710	0.06	0.000121853	-3.36735	0.891335	0.0783191	3.91416	0.234877
2018	K + PCO	First_LeafLength	C03_3671710	C03	3671710	0.06	1.02136e-05	-3.5033	0.814734	0.100264	4.99082	0.319722
2018	K	First_LeafLength	C03_3671710	C03	3671710	0.06	8.62883e-06	-3.37629	0.777405	0.102177	5.06405	0.29696
2018	K + PCO	Second_LeafLength	C03_3671751	C03	3671751	0.0628571	0.000433065	-3.1852	0.918622	0.0663939	3.36345	0.210154
2018	K	Second_LeafLength	C03_3671751	C03	3671751	0.0628571	0.000254783	-3.15398	0.875337	0.071502	3.59383	0.206054
2018	K + PCO	First_LeafLength	C03_3671751	C03	3671751	0.0628571	0.000140481	-2.98758	0.799031	0.0767788	3.85238	0.232517
2018	K	First_LeafLength	C03_3671751	C03	3671751	0.0628571	0.000109766	-2.90259	0.763452	0.079279	3.95953	0.219477
2017	K	LeafLength	C03_3671771	C03	3671771	0.0399306	0.000625148	-4.39959	1.29606	0.0392213	3.20402	0.150755
2018	K + PCO	Second_LeafLength	C03_3671771	C03	3671771	0.0485714	0.000255992	-3.60413	1.002	0.0712639	3.59177	0.204165
2018	K	Second_LeafLength	C03_3671771	C03	3671771	0.0485714	5.57567e-05	-3.78789	0.957969	0.085467	4.2537	0.225515
2018	K + PCO	First_LeafLength	C03_3671771	C03	3671771	0.0485714	2.03628e-05	-3.62619	0.871558	0.0941822	4.69116	0.259918
2018	K	First_LeafLength	C03_3671771	C03	3671771	0.0485714	6.80471e-06	-3.66772	0.835521	0.104267	5.16719	0.265904
2019	K + PCO	Second_LeafRatio	C03_4831437	C03	4831437	0.0473251	0.000898063	-0.0953228	0.0289617	0.043601	3.04669	0.108687
2019	K + PCO	First_LeafRatio	C03_4953445	C03	4953445	0.315353	0.000556764	-0.050986	0.0149181	0.0473128	3.25433	0.005843
2018	K	First_LeafWidth	C03_5034043	C03	5034043	0.0514286	0.000962707	1.97125	0.603972	0.0590556	3.01651	0.260222
2018	K + PCO	First_LeafWidth	C03_5034043	C03	5034043	0.0514286	0.000866227	1.90812	0.580254	0.0599225	3.06237	0.243822
2018	K + PCO	First_LeafArea	C03_5034043	C03	5034043	0.0514286	0.000669012	71.3847	21.2692	0.0623403	3.17457	0.295576
2018	K + PCO	First_LeafRatio	C03_5631145	C03	5631145	0.162857	0.000968174	0.0683838	0.0209845	0.058879	3.01405	0.0451121
2018	K	First_LeafRatio	C03_5631145	C03	5631145	0.162857	0.000595985	0.0738678	0.0217885	0.0635671	3.22476	0.0526378
2019	K + PCO	First_LeafRatio	C03_5631157	C03	5631157	0.0435685	6.43012e-05	0.110318	0.028005	0.0623587	4.19178	0.205713
2019	K	First_LeafRatio	C03_5631157	C03	5631157	0.0435685	5.51298e-05	0.111356	0.0279972	0.0635334	4.25861	0.209602
2019	K + PCO	First_LeafRatio	C03_5631223	C03	5631223	0.0456432	0.000329165	0.0980008	0.0275915	0.0510004	3.48259	0.149084
2019	K	First_LeafRatio	C03_5631223	C03	5631223	0.0456432	0.000254385	0.0997431	0.0275655	0.0528778	3.59451	0.154433
2017	K + PCO	HeadArea	C03_5648602	C03	5648602	0.0731707	0.000507106	-36.1393	10.4973	0.0470377	3.2949	0.144899
2017	K + PCO	HeadArea	C03_5648655	C03	5648655	0.0731707	0.000507106	-36.1393	10.4973	0.0470377	3.2949	0.171946
2017	K	HeadArea	C03_5718034	C03	5718034	0.0162602	0.0001819	86.1122	23.267	0.0541599	3.74017	0.781186
2018	K	HeadWidth	C03_6253596	C03	6253596	0.210191	0.000746885	-2.70348	0.81267	0.0680617	3.12675	0.0501697
2019	K + PCO	Leaf_Number	C03_6253596	C03	6253596	0.244186	0.000726514	-2.5142	0.751921	0.0506727	3.13876	0.0602915
2018	K	Second_LeafRatio	C03_8119079	C03	8119079	0.0228571	0.000612561	0.212177	0.0627165	0.0633096	3.21285	0.179813
2018	K + PCO	First_LeafRatio	C03_8119079	C03	8119079	0.0228571	0.000602479	0.185546	0.0548408	0.0633186	3.22006	0.164018
2018	K	First_LeafRatio	C03_8119079	C03	8119079	0.0228571	0.000269092	0.202042	0.0562813	0.0709943	3.5701	0.194479
2019	K	Second_LeafWidth	C03_8557483	C03	8557483	0.179012	0.0009495	1.62219	0.494864	0.0432574	3.0225	0.0479568
2019	K + PCO	Second_LeafWidth	C03_8557483	C03	8557483	0.179012	0.000865614	1.66377	0.503978	0.0438583	3.06268	0.0504463
2019	K	Second_LeafWidth	C03_8557491	C03	8557491	0.179012	0.0009495	1.62219	0.494864	0.0432574	3.0225	0.00560312
2019	K + PCO	Second_LeafWidth	C03_8557491	C03	8557491	0.179012	0.000865614	1.66377	0.503978	0.0438583	3.06268	0.00589398
2018	K + PCO	HeadHeight	C03_9479723	C03	9479723	0.0509554	7.85116e-05	-3.61706	0.936676	0.0906091	4.10507	0.267526
2018	K	HeadHeight	C03_9479723	C03	9479723	0.0509554	6.68683e-05	-3.55036	0.909062	0.0925833	4.17478	0.25775
2018	K + PCO	HeadArea	C03_9854962	C03	9854962	0.0414013	0.000956461	120.435	36.9795	0.0653278	3.01933	0.285967
2017	K + PCO	LeafWidth	C03_11403850	C03	11403850	0.154514	0.000740007	-2.39061	0.713967	0.0381805	3.13076	0.00714977
2018	K	First_LeafArea	C03_11403850	C03	11403850	0.177143	0.000639243	-47.2136	14.0015	0.0629093	3.19433	0.132403
2017	K	LeafArea	C03_11403850	C03	11403850	0.154514	0.000340218	-121.209	34.1245	0.0428616	3.46824	0.00761922
2017	K + PCO	LeafArea	C03_11403850	C03	11403850	0.154514	0.00026099	-126.215	34.898	0.0444017	3.58338	0.00826149
2018	K + PCO	Second_LeafRatio	C03_11642160	C03	11642160	0.125714	0.000478464	0.0825834	0.0239913	0.0654667	3.32015	0.0764178
2018	K	Second_LeafRatio	C03_11642160	C03	11642160	0.125714	0.000124416	0.0935716	0.0247999	0.0781277	3.90512	0.0981064
2018	K + PCO	First_LeafRatio	C03_11642160	C03	11642160	0.125714	4.74123e-05	0.0860193	0.0216007	0.0866339	4.32411	0.0988925
2018	K	First_LeafRatio	C03_11642160	C03	11642160	0.125714	2.01544e-05	0.0928326	0.0222553	0.0946426	4.69563	0.115179
2018	K + PCO	First_LeafRatio	C03_11642207	C03	11642207	0.128571	0.000151219	0.0819234	0.0220113	0.0761045	3.82039	0.101122
2018	K	First_LeafRatio	C03_11642207	C03	11642207	0.128571	0.000149192	0.0838947	0.0224871	0.0764552	3.82625	0.106047
2018	K + PCO	HeadRatio	C03_11841330	C03	11841330	0.433121	0.000145333	0.0543813	0.0146087	0.0844797	3.83764	0.0179599
2018	K	HeadRatio	C03_11841330	C03	11841330	0.433121	9.50972e-05	0.0515836	0.0134792	0.0890634	4.02183	0.0161596
2018	K + PCO	HeadRatio	C03_11841419	C03	11841419	0.433121	0.000145333	0.0543813	0.0146087	0.0844797	3.83764	0.0790667
2018	K	HeadRatio	C03_11841419	C03	11841419	0.433121	9.50972e-05	0.0515836	0.0134792	0.0890634	4.02183	0.0711408
2019	K	First_LeafRatio	C03_12190440	C03	12190440	0.0103734	0.000882099	0.198283	0.0601262	0.0441229	3.05448	0.414485
2019	K	First_LeafLength	C03_12190440	C03	12190440	0.0103734	0.000780138	7.69679	2.3108	0.0449904	3.10783	0.532992
2019	K + PCO	First_LeafLength	C03_12190440	C03	12190440	0.0103734	0.000629103	7.90034	2.33336	0.0464539	3.20128	0.561557
2018	K + PCO	First_LeafRatio	C03_12251975	C03	12251975	0.108571	0.000818199	-0.0958151	0.0290039	0.0604569	3.08714	0.113842
2018	K + PCO	Second_LeafRatio	C03_12251975	C03	12251975	0.108571	0.000295785	-0.114739	0.0322138	0.069929	3.52902	0.136867
2018	K	Second_LeafRatio	C03_12349719	C03	12349719	0.0828571	0.000696642	0.131602	0.0392889	0.0621014	3.15699	0.0761793
2017	K + PCO	HeadHeight	C03_13896614	C03	13896614	0.308943	0.000250103	-0.932082	0.257419	0.0519003	3.60188	0.00667082
2018	K	HeadRatio	C03_14146243	C03	14146243	0.267516	0.00093575	-0.0506536	0.0155042	0.0657269	3.02884	0.0483948
2018	K	First_LeafRatio	C03_15634368	C03	15634368	0.0257143	0.000872836	0.163357	0.0496518	0.0599794	3.05907	0.18296
2018	K + PCO	Second_LeafRatio	C03_15634368	C03	15634368	0.0257143	0.000121667	0.207974	0.0551335	0.078093	3.91483	0.248621
2018	K	Second_LeafRatio	C03_15634368	C03	15634368	0.0257143	2.349e-05	0.229028	0.055329	0.0932711	4.62912	0.301508
2018	K + PCO	First_LeafRatio	C03_15673164	C03	15673164	0.157143	0.000676649	-0.0712668	0.0212527	0.0622342	3.16964	0.0545817
2018	K	Second_LeafRatio	C03_15673164	C03	15673164	0.157143	0.000391859	-0.0839071	0.0239943	0.0674926	3.40687	0.0634318
2018	K + PCO	Second_LeafRatio	C03_15673164	C03	15673164	0.157143	0.000339889	-0.0832703	0.0236048	0.0686424	3.46866	0.0624727
2018	K + PCO	First_LeafRatio	C03_15673165	C03	15673165	0.157143	0.000676649	-0.0712668	0.0212527	0.0622342	3.16964	0.0663408
2018	K	Second_LeafRatio	C03_15673165	C03	15673165	0.157143	0.000391859	-0.0839071	0.0239943	0.0674926	3.40687	0.0770976
2018	K + PCO	Second_LeafRatio	C03_15673165	C03	15673165	0.157143	0.000339889	-0.0832703	0.0236048	0.0686424	3.46866	0.0759318
2017	K + PCO	LeafRatio	C03_15975669	C03	15975669	0.0243056	0.000464393	-0.227057	0.0654194	0.0409651	3.33311	0.215548
2017	K + PCO	LeafRatio	C03_15999527	C03	15999527	0.0243056	0.000464393	-0.227057	0.0654194	0.0409651	3.33311	0.262408
2019	K + PCO	Head_Ratio	C03_16756810	C03	16756810	0.0209302	7.70409e-05	0.20159	0.0518075	0.0680006	4.11328	0.115009
2019	K	Head_Ratio	C03_16756810	C03	16756810	0.0209302	6.40124e-05	0.202381	0.0514009	0.0695661	4.19374	0.115913
2017	K + PCO	LeafLength	C03_16905567	C03	16905567	0.0729167	0.000966527	-4.39807	1.34243	0.0365828	3.01479	0.143659
2018	K	Second_LeafLength	C03_16905567	C03	16905567	0.0714286	0.0003611	-3.1618	0.89891	0.0682556	3.44237	0.148288
2017	K	LeafLength	C03_16905567	C03	16905567	0.0729167	0.000245662	-4.43037	1.21932	0.0448062	3.60966	0.145777
2017	K + PCO	LeafLength	C03_16905592	C03	16905592	0.0729167	0.000239244	-5.03236	1.3832	0.0449197	3.62116	0.186016
2018	K	Second_LeafLength	C03_16905592	C03	16905592	0.0714286	0.00016955	-3.42333	0.925049	0.0752746	3.7707	0.3101
2017	K	LeafLength	C03_16905592	C03	16905592	0.0729167	6.33768e-05	-4.95524	1.25297	0.0528592	4.19807	0.180359
2018	K + PCO	Second_LeafLength	C03_16905609	C03	16905609	0.0742857	0.000837273	-3.28384	0.995876	0.060241	3.07713	0.285343
2017	K + PCO	LeafLength	C03_16905609	C03	16905609	0.0746528	0.000468583	-4.58966	1.32325	0.0409115	3.32921	0.0588666
2017	K	LeafLength	C03_16905609	C03	16905609	0.0746528	0.000129794	-4.57361	1.20733	0.0486067	3.88674	0.0584556
2018	K	Second_LeafLength	C03_16905609	C03	16905609	0.0742857	9.75523e-05	-3.39476	0.886615	0.0803611	4.01076	0.304946
2018	K	Second_LeafLength	C03_16946055	C03	16946055	0.1	0.000658043	-3.20261	0.951885	0.062637	3.18175	0.211733
2018	K	Second_LeafArea	C03_16946055	C03	16946055	0.1	0.00026503	-90.1142	25.0765	0.0711357	3.5767	0.259779
2017	K	LeafLength	C03_16946057	C03	16946057	0.119792	0.000573566	-3.97658	1.16367	0.039737	3.24142	0.0732063
2018	K	Second_LeafWidth	C03_16946057	C03	16946057	0.131429	0.000431768	-2.03937	0.587282	0.0665863	3.36475	0.151555
2018	K + PCO	Second_LeafArea	C03_16946057	C03	16946057	0.131429	0.000301213	-88.9489	25.0041	0.0697608	3.52113	0.237339
2018	K	Second_LeafLength	C03_16946057	C03	16946057	0.131429	0.000215423	-2.92931	0.803942	0.073059	3.66671	0.166104
2018	K	Second_LeafArea	C03_16946057	C03	16946057	0.131429	1.92738e-05	-89.4223	21.3903	0.0950421	4.71503	0.239873
2017	K	LeafLength	C03_16946060	C03	16946060	0.119792	0.000573566	-3.97658	1.16367	0.039737	3.24142	0.0844574
2018	K	Second_LeafWidth	C03_16946060	C03	16946060	0.131429	0.000431768	-2.03937	0.587282	0.0665863	3.36475	0.15907
2018	K + PCO	Second_LeafArea	C03_16946060	C03	16946060	0.131429	0.000301213	-88.9489	25.0041	0.0697608	3.52113	0.249109
2018	K	Second_LeafLength	C03_16946060	C03	16946060	0.131429	0.000215423	-2.92931	0.803942	0.073059	3.66671	0.174341
2018	K	Second_LeafArea	C03_16946060	C03	16946060	0.131429	1.92738e-05	-89.4223	21.3903	0.0950421	4.71503	0.251768
2018	K + PCO	Second_LeafArea	C03_17801837	C03	17801837	0.434286	0.000232452	43.3506	11.9747	0.0721537	3.63367	0.0771858
2018	K + PCO	Second_LeafArea	C03_17801845	C03	17801845	0.434286	0.000232452	43.3506	11.9747	0.0721537	3.63367	0.00678282
2018	K + PCO	Second_LeafArea	C03_17801866	C03	17801866	0.431429	0.000136336	44.9065	11.988	0.0770528	3.86539	0.0106572
2018	K	Second_LeafWidth	C03_18262206	C03	18262206	0.402857	0.000467216	1.09617	0.317491	0.0658483	3.33048	0.0251525
2019	K + PCO	Head_Area	C03_19546218	C03	19546218	0.118605	0.000470519	34.7436	10.0514	0.0540561	3.32742	0.0148626
2019	K	Head_Area	C03_19546218	C03	19546218	0.118605	0.00039438	34.0451	9.71502	0.0555186	3.40409	0.014271
2019	K	Head_Width	C03_19546218	C03	19546218	0.118605	0.000379748	1.71607	0.488361	0.0558132	3.42051	0.0115777
2019	K + PCO	Head_Width	C03_19546218	C03	19546218	0.118605	0.000283477	1.77148	0.49431	0.0579866	3.54748	0.0123374
2017	K + PCO	HeadRatio	C03_19710594	C03	19710594	0.0406504	0.000943752	0.0886887	0.0270533	0.0427474	3.02514	0.126409
2018	K	HeadWidth	C03_19710594	C03	19710594	0.0350318	0.000556013	-5.01955	1.47501	0.071108	3.25491	0.366225
2017	K	HeadRatio	C03_19710594	C03	19710594	0.0406504	0.000409417	0.0967888	0.0276554	0.0485723	3.38783	0.150554
2018	K + PCO	HeadWidth	C03_19710594	C03	19710594	0.0350318	0.000260714	-5.46914	1.52555	0.0786011	3.58384	0.434765
2017	K + PCO	HeadRatio	C03_19710598	C03	19710598	0.0406504	0.000943752	0.0886887	0.0270533	0.0427474	3.02514	0.11444
2018	K	HeadWidth	C03_19710598	C03	19710598	0.0350318	0.000556013	-5.01955	1.47501	0.071108	3.25491	0.353015
2017	K	HeadRatio	C03_19710598	C03	19710598	0.0406504	0.000409417	0.0967888	0.0276554	0.0485723	3.38783	0.136298
2018	K + PCO	HeadWidth	C03_19710598	C03	19710598	0.0350318	0.000260714	-5.46914	1.52555	0.0786011	3.58384	0.419084
2019	K + PCO	First_LeafArea	C03_20682042	C03	20682042	0.381743	0.000736502	-53.4506	15.9831	0.0453448	3.13283	0.00200835
2019	K	Second_LeafArea	C03_20682042	C03	20682042	0.380658	0.000616278	-63.8393	18.812	0.0462861	3.21022	0.00321111
2019	K	First_LeafArea	C03_20682042	C03	20682042	0.381743	0.000273884	-56.0942	15.5811	0.0523598	3.56243	0.00221193
2019	K + PCO	Second_LeafWidth	C03_20682042	C03	20682042	0.380658	0.000242394	-1.45644	0.401444	0.0527258	3.61548	0.00369668
2019	K + PCO	First_LeafWidth	C03_20682042	C03	20682042	0.381743	0.000116277	-1.40925	0.370526	0.0582574	3.93451	0.0024159
2019	K	Second_LeafWidth	C03_20682042	C03	20682042	0.380658	9.58394e-05	-1.5079	0.391468	0.0592322	4.01846	0.00396253
2019	K	First_LeafWidth	C03_20682042	C03	20682042	0.381743	2.32416e-05	-1.51255	0.363065	0.0694848	4.63373	0.00278306
2019	K + PCO	First_LeafArea	C03_20712136	C03	20712136	0.197095	0.00064932	66.9066	19.8095	0.0462314	3.18754	0.0385534
2019	K	First_LeafArea	C03_20712136	C03	20712136	0.197095	0.000626699	66.5289	19.6315	0.0465359	3.20294	0.0381194
2019	K + PCO	First_LeafWidth	C03_20712136	C03	20712136	0.197095	0.000456278	1.58631	0.457265	0.0487108	3.34077	0.0375034
2019	K	First_LeafWidth	C03_20712136	C03	20712136	0.197095	0.000415934	1.59602	0.456648	0.0494239	3.38098	0.0379639
2019	K + PCO	Second_LeafArea	C03_20712136	C03	20712136	0.195473	0.000196734	87.3055	23.7319	0.0541721	3.70612	0.047748
2019	K	Second_LeafArea	C03_20712136	C03	20712136	0.195473	0.000196079	87.0989	23.6529	0.0542737	3.70757	0.0475223
2019	K	First_LeafLength	C03_20712145	C03	20712145	0.309129	0.000805179	-1.76882	0.532404	0.0447673	3.09411	0.0153061
2019	K	Second_LeafWidth	C03_20712145	C03	20712145	0.3107	0.000775929	-1.46792	0.44049	0.0446727	3.11018	0.0214778
2019	K + PCO	First_LeafArea	C03_20712145	C03	20712145	0.309129	0.000689264	-61.0751	18.1676	0.0458114	3.16161	0.0233378
2019	K	Second_LeafArea	C03_20712145	C03	20712145	0.3107	0.000566887	-72.2024	21.1401	0.0468707	3.2465	0.0234932
2019	K	Second_LeafLength	C03_20712145	C03	20712145	0.3107	0.000438097	-2.0156	0.578849	0.0486725	3.35843	0.0155002
2019	K	First_LeafWidth	C03_20712145	C03	20712145	0.309129	0.000328969	-1.44545	0.406659	0.0510731	3.48285	0.0226207
2019	K + PCO	Second_LeafWidth	C03_20712145	C03	20712145	0.3107	0.000325317	-1.63352	0.459482	0.0506827	3.48769	0.0265969
2019	K + PCO	First_LeafWidth	C03_20712145	C03	20712145	0.309129	0.000277488	-1.51488	0.421463	0.0521956	3.55676	0.0248461
2019	K + PCO	First_LeafLength	C03_20712145	C03	20712145	0.309129	0.000177113	-2.00817	0.5422	0.0553303	3.75175	0.0197286
2019	K + PCO	Second_LeafArea	C03_20712145	C03	20712145	0.3107	0.000126486	-83.6678	22.1104	0.0572249	3.89796	0.0315468
2019	K + PCO	Second_LeafLength	C03_20712145	C03	20712145	0.3107	5.91599e-05	-2.32622	0.58766	0.0624478	4.22797	0.0206457
2019	K	Second_LeafWidth	C03_20712231	C03	20712231	0.152263	0.000841128	1.76105	0.531906	0.0441072	3.07514	0.0387595
2019	K + PCO	Second_LeafWidth	C03_20712231	C03	20712231	0.152263	0.000677959	1.80759	0.536949	0.045566	3.1688	0.0408352
2019	K	Second_LeafArea	C03_20712231	C03	20712231	0.152263	0.000258487	92.0254	25.4581	0.052352	3.58756	0.0478526
2019	K + PCO	Second_LeafArea	C03_20712231	C03	20712231	0.152263	0.000173618	95.1587	25.6567	0.0550371	3.76041	0.0511666
2019	K + PCO	Head_Width	C03_22394640	C03	22394640	0.0232558	0.000426229	3.53037	1.01396	0.0548244	3.37036	0.356174
2019	K	Head_Width	C03_22394640	C03	22394640	0.0232558	0.000196476	3.70617	1.00808	0.0609317	3.70669	0.392531
2019	K + PCO	Head_Diameter	C03_22394640	C03	22394640	0.0232558	0.000194374	3.13665	0.853389	0.0609014	3.71136	0.395587
2019	K	Head_Diameter	C03_22394640	C03	22394640	0.0232558	6.17917e-05	3.3507	0.849305	0.0698362	4.20907	0.45142
2017	K + PCO	LeafWidth	C03_22921705	C03	22921705	0.338542	0.000957663	1.65959	0.506172	0.036638	3.01879	0.0368591
2017	K	LeafArea	C03_22921705	C03	22921705	0.338542	0.000931989	77.9471	23.7111	0.0368283	3.03059	0.0337061
2017	K	LeafWidth	C03_22921705	C03	22921705	0.338542	0.000330488	1.73693	0.487996	0.043035	3.48084	0.0403746
2018	K	HeadWidth	C03_24515906	C03	24515906	0.0414013	0.000593409	4.13749	1.22181	0.0704372	3.22665	0.105554
2018	K	First_LeafRatio	C03_24822469	C03	24822469	0.142857	0.000505375	0.0758746	0.0221041	0.0651133	3.29639	0.0355276
2017	K	LeafRatio	C03_26337618	C03	26337618	0.0486111	0.000259231	-0.149818	0.0413845	0.0444853	3.58631	0.185464
2017	K + PCO	LeafRatio	C03_26337618	C03	26337618	0.0486111	0.000115303	-0.166057	0.0435385	0.0492554	3.93816	0.22785
2017	K	LeafRatio	C03_26337634	C03	26337634	0.0486111	0.000259231	-0.149818	0.0413845	0.0444853	3.58631	0.182945
2017	K + PCO	LeafRatio	C03_26337634	C03	26337634	0.0486111	0.000115303	-0.166057	0.0435385	0.0492554	3.93816	0.224755
2018	K + PCO	HeadArea	C03_26781354	C03	26781354	0.328025	0.000232395	104.07	28.8081	0.0797624	3.63377	0.0539599
2018	K + PCO	HeadHeight	C03_26781354	C03	26781354	0.328025	2.03889e-05	3.88191	0.935917	0.103786	4.69061	0.0719717
2019	K + PCO	First_LeafLength	C03_26968902	C03	26968902	0.0290456	0.000408612	5.2372	1.4975	0.049485	3.38869	0.352854
2019	K + PCO	First_LeafArea	C03_26968902	C03	26968902	0.0290456	0.000264201	177.906	49.3298	0.0525388	3.57807	0.52073
2019	K	First_LeafArea	C03_26968902	C03	26968902	0.0290456	0.000181044	177.729	48.0178	0.0552597	3.74222	0.519694
2019	K	First_LeafLength	C03_26968902	C03	26968902	0.0290456	0.000163276	5.54455	1.48802	0.0559819	3.78708	0.395484
2019	K + PCO	Second_LeafLength	C03_27971513	C03	27971513	0.185185	0.000735238	-2.34718	0.701714	0.0449994	3.13357	0.0388987
2019	K	Second_LeafLength	C03_27971537	C03	27971537	0.174897	0.000587377	-2.36566	0.694527	0.0466222	3.23108	0.0537717
2019	K + PCO	Second_LeafLength	C03_27971537	C03	27971537	0.174897	0.000330344	-2.54439	0.716469	0.0505761	3.48103	0.062204
2019	K	Head_Area	C03_28367729	C03	28367729	0.0325581	0.000493524	69.0757	20.0385	0.0537695	3.30669	0.232187
2019	K	Head_Height	C03_28367729	C03	28367729	0.0325581	0.000208987	2.91706	0.796674	0.0604535	3.67988	0.267489
2019	K	Head_Area	C03_28367751	C03	28367751	0.0325581	0.000493524	69.0757	20.0385	0.0537695	3.30669	0.305883
2019	K	Head_Height	C03_28367751	C03	28367751	0.0325581	0.000208987	2.91706	0.796674	0.0604535	3.67988	0.352389
2019	K + PCO	Head_Height	C03_28367866	C03	28367866	0.0325581	0.000275582	2.81494	0.783953	0.0582052	3.55975	0.32906
2019	K	Head_Height	C03_28367866	C03	28367866	0.0325581	4.39134e-05	3.05377	0.759457	0.0724438	4.3574	0.387268
2019	K	Head_Height	C03_28367892	C03	28367892	0.027907	0.000425151	2.73755	0.785453	0.0549329	3.37146	0.475766
2019	K	Head_Height	C03_28367930	C03	28367930	0.027907	0.000425151	2.73755	0.785453	0.0549329	3.37146	0.149993
2019	K	Head_Height	C03_28367939	C03	28367939	0.027907	0.000425151	2.73755	0.785453	0.0549329	3.37146	0.475766
2017	K	HeadArea	C03_31144506	C03	31144506	0.0203252	0.000270937	68.3517	18.9675	0.0514197	3.56713	0.0697966
2017	K	HeadArea	C03_31144510	C03	31144510	0.0203252	0.000270937	68.3517	18.9675	0.0514197	3.56713	0.395691
2018	K + PCO	HeadHeight	C03_31921146	C03	31921146	0.487261	0.000871885	-2.17626	0.663226	0.0662816	3.05954	0.0197823
2018	K + PCO	HeadArea	C03_31921146	C03	31921146	0.487261	0.00080799	-67.0492	20.3097	0.0670647	3.09259	0.0195879
2017	K	HeadHeight	C03_32615070	C03	32615070	0.0345528	0.000411427	2.45603	0.702011	0.0485385	3.38571	0.431572
2017	K	LeafRatio	C03_33311634	C03	33311634	0.123264	0.000767808	-0.0949115	0.0284183	0.0379898	3.11475	0.0435656
2017	K	HeadWidth	C03_33313981	C03	33313981	0.0894309	0.000973652	-1.3231	0.404426	0.0425755	3.0116	0.0751352
2017	K + PCO	HeadWidth	C03_37722304	C03	37722304	0.270325	0.000980172	1.17742	0.360286	0.0424855	3.0087	0.00616099
2019	K	First_LeafArea	C03_37861347	C03	37861347	0.172199	0.000816149	-73.6434	22.1904	0.0446718	3.08823	0.122035
2019	K + PCO	First_LeafArea	C03_37861347	C03	37861347	0.172199	0.000305856	-80.8307	22.6405	0.0515146	3.51448	0.147017
2019	K	Second_LeafLength	C03_37861347	C03	37861347	0.170782	0.000170101	-2.66104	0.715975	0.0552605	3.76929	0.0974487
2019	K	Second_LeafWidth	C03_37861347	C03	37861347	0.170782	0.000148508	-2.11742	0.564779	0.056202	3.82825	0.161193
2019	K + PCO	Second_LeafWidth	C03_37861347	C03	37861347	0.170782	4.66148e-05	-2.31398	0.576835	0.0640779	4.33148	0.192508
2019	K + PCO	Second_LeafLength	C03_37861347	C03	37861347	0.170782	3.5721e-05	-2.92164	0.717864	0.0658938	4.44708	0.11747
2019	K	Second_LeafArea	C03_37861347	C03	37861347	0.170782	1.35323e-05	-117.099	27.3576	0.0726233	4.86863	0.222891
2019	K + PCO	Second_LeafArea	C03_37861347	C03	37861347	0.170782	2.51501e-06	-128.728	27.9306	0.0837015	5.59946	0.269358
2019	K	First_LeafArea	C03_37861388	C03	37861388	0.174274	0.00064419	-75.2728	22.2593	0.0463418	3.19099	0.0857185
2019	K + PCO	First_LeafArea	C03_37861388	C03	37861388	0.174274	0.000247241	-82.2995	22.7172	0.0530025	3.60688	0.102469
2019	K	Second_LeafWidth	C03_37861388	C03	37861388	0.17284	0.000177068	-2.09917	0.566269	0.0549819	3.75186	0.107855
2019	K	Second_LeafLength	C03_37861388	C03	37861388	0.17284	0.000107236	-2.7496	0.718695	0.0584559	3.96966	0.0708316
2019	K + PCO	Second_LeafWidth	C03_37861388	C03	37861388	0.17284	6.05419e-05	-2.28697	0.578501	0.0622896	4.21794	0.128017
2019	K + PCO	Second_LeafLength	C03_37861388	C03	37861388	0.17284	2.16038e-05	-3.01126	0.720765	0.0693103	4.66547	0.0849541
2019	K	Second_LeafArea	C03_37861388	C03	37861388	0.17284	1.31653e-05	-117.52	27.4194	0.0728095	4.88057	0.152835
2019	K + PCO	Second_LeafArea	C03_37861388	C03	37861388	0.17284	2.62005e-06	-128.831	28.0003	0.0834312	5.58169	0.183672
2017	K	HeadWidth	C03_40620014	C03	40620014	0.436992	0.000838889	0.921136	0.27813	0.0436085	3.0763	0.0495669
2017	K + PCO	HeadWidth	C03_40620014	C03	40620014	0.436992	0.000488206	0.976171	0.282742	0.0472996	3.3114	0.0556668
2017	K	HeadArea	C03_40620014	C03	40620014	0.436992	0.000113512	25.6503	6.72687	0.0573921	3.94496	0.0783192
2017	K + PCO	HeadArea	C03_40620014	C03	40620014	0.436992	5.77735e-05	26.9855	6.80675	0.0618935	4.23827	0.086685
2017	K	HeadWidth	C03_40620023	C03	40620023	0.436992	0.000737126	0.93574	0.279615	0.0445047	3.13246	0.0475501
2017	K + PCO	HeadWidth	C03_40620023	C03	40620023	0.436992	0.000427591	0.992182	0.284576	0.0482131	3.36897	0.0534594
2017	K	HeadArea	C03_40620023	C03	40620023	0.436992	0.000267103	24.3901	6.7616	0.0515178	3.57332	0.0658275
2017	K + PCO	HeadArea	C03_40620023	C03	40620023	0.436992	0.000139157	25.7734	6.85058	0.0559139	3.85649	0.0735062
2018	K + PCO	HeadArea	C03_42288913	C03	42288913	0.152866	0.000570911	-83.3597	24.5818	0.0706279	3.24343	0.107451
2017	K	HeadArea	C03_43492349	C03	43492349	0.392276	0.000489322	22.0559	6.38554	0.0473404	3.31041	0.0391634
2017	K + PCO	HeadArea	C03_43492349	C03	43492349	0.392276	0.000382602	22.246	6.32923	0.0489786	3.41725	0.0398412
2017	K	HeadArea	C03_43492361	C03	43492361	0.394309	0.000585728	21.739	6.38021	0.0460965	3.2323	0.0380362
2017	K + PCO	HeadArea	C03_43492361	C03	43492361	0.394309	0.00047922	21.8721	6.32633	0.0474277	3.31947	0.0385032
2019	K	First_LeafLength	C03_45048695	C03	45048695	0.0684647	0.00034656	-3.3782	0.953931	0.0507071	3.46022	0.012795
2019	K	Second_LeafLength	C03_45048695	C03	45048695	0.0720165	0.000149179	-3.81753	1.01854	0.0561708	3.82629	0.0126706
2019	K + PCO	First_LeafLength	C03_45048695	C03	45048695	0.0684647	0.0001316	-3.59979	0.953754	0.0573975	3.88074	0.0145286
2019	K + PCO	Second_LeafLength	C03_45048695	C03	45048695	0.0720165	4.58836e-05	-4.08294	1.01692	0.0641859	4.33834	0.0144936
2019	K	Head_Height	C03_46120134	C03	46120134	0.225581	0.000623022	0.9685	0.285974	0.0519488	3.2055	0.0230785
2019	K + PCO	Head_Height	C03_46120134	C03	46120134	0.225581	0.00054399	1.01028	0.295463	0.0529274	3.26441	0.0251125
2019	K	Leaf_Number	C03_46382807	C03	46382807	0.418605	0.00087383	1.95286	0.592328	0.0493002	3.05857	0.0306532
2018	K	First_LeafLength	C03_46848192	C03	46848192	0.414286	0.000405653	-1.31954	0.37828	0.0671694	3.39185	0.0392579
2019	K	Head_Weight	C03_48605548	C03	48605548	0.486047	0.00089934	0.2252	0.0684667	0.0490747	3.04608	0.0433977
2019	K	Head_Weight	C03_48605557	C03	48605557	0.488372	0.000883889	0.225817	0.0685572	0.0492105	3.0536	0.043959
2018	K	HeadWidth	C03_48820378	C03	48820378	0.0254777	0.000871195	6.86405	2.08881	0.066468	3.05988	0.527818
2018	K + PCO	HeadWidth	C03_48820378	C03	48820378	0.0254777	0.000727532	7.04004	2.11494	0.0681426	3.13815	0.555231
2018	K	HeadArea	C03_48820378	C03	48820378	0.0254777	0.000380893	173.699	49.6504	0.0749948	3.4192	0.575331
2018	K + PCO	HeadArea	C03_48820378	C03	48820378	0.0254777	0.000163317	181.581	49.1353	0.0833108	3.78697	0.628731
2018	K	First_LeafRatio	C03_48967756	C03	48967756	0.0285714	0.000856986	0.140653	0.0426878	0.0601521	3.06703	0.174134
2018	K	First_LeafRatio	C03_48968422	C03	48968422	0.0257143	0.000985609	0.149808	0.0459889	0.0588339	3.0063	0.22646
2018	K	First_LeafRatio	C03_48968469	C03	48968469	0.0257143	0.000985609	0.149808	0.0459889	0.0588339	3.0063	0.0866002
2018	K	First_LeafRatio	C03_48968538	C03	48968538	0.0257143	0.000985609	0.149808	0.0459889	0.0588339	3.0063	0.0707647
2017	K + PCO	LeafLength	C03_49937023	C03	49937023	0.0538194	0.000469327	-4.26596	1.23007	0.040902	3.32852	0.197401
2019	K + PCO	Head_Height	C03_51461585	C03	51461585	0.211628	0.00076558	1.13947	0.342198	0.0502641	3.11601	0.0136751
2019	K	Head_Height	C03_51461585	C03	51461585	0.211628	0.000426279	1.13769	0.326489	0.0549123	3.37031	0.0136326
2018	K + PCO	HeadArea	C03_52510019	C03	52510019	0.0541401	0.000655094	95.1712	28.3597	0.0692189	3.1837	0.271249
2018	K	HeadArea	C03_52510019	C03	52510019	0.0541401	0.000250575	99.215	27.5524	0.0792728	3.60106	0.294789
2019	K	Head_Height	C03_53674315	C03	53674315	0.248837	0.000924028	1.06386	0.32416	0.0488624	3.03431	0.0301128
2019	K + PCO	Head_Height	C03_53674315	C03	53674315	0.248837	0.000324922	1.17914	0.332156	0.0569299	3.48822	0.0369928
2017	K + PCO	LeafWidth	C03_56975698	C03	56975698	0.428819	0.000743431	1.74296	0.520735	0.0381529	3.12876	0.0460126
2018	K + PCO	First_LeafLength	C03_57526247	C03	57526247	0.485714	0.000435631	1.99656	0.576062	0.066339	3.36088	0.0723366
2017	K	HeadArea	C04_148300	C04	148300	0.0528455	0.000561695	44.9158	13.1401	0.0463864	3.2505	0.246429
2017	K + PCO	HeadHeight	C04_148300	C04	148300	0.0528455	0.000236582	1.80499	0.496625	0.0522816	3.62602	0.269538
2017	K	HeadHeight	C04_148300	C04	148300	0.0528455	1.08081e-05	2.21995	0.512984	0.0733025	4.96625	0.407716
2019	K	Second_LeafLength	C04_855999	C04	855999	0.0329218	0.000815209	4.86161	1.46467	0.0443266	3.08873	0.00854407
2019	K	Second_LeafLength	C04_856005	C04	856005	0.0329218	0.000815209	4.86161	1.46467	0.0443266	3.08873	0.212965
2018	K	HeadHeight	C04_1142359	C04	1142359	0.140127	0.000596461	1.91469	0.565633	0.0703843	3.22442	0.0974881
2019	K + PCO	First_LeafArea	C04_1142368	C04	1142368	0.342324	0.000888115	51.7219	15.7014	0.0440264	3.05153	0.0299847
2018	K	HeadHeight	C04_1142407	C04	1142407	0.159236	0.00062445	1.75115	0.519133	0.0699112	3.2045	0.0159736
2018	K	HeadHeight	C04_1142419	C04	1142419	0.130573	0.000398713	2.03011	0.582185	0.0745261	3.39934	0.0214682
2018	K	HeadWidth	C04_1142541	C04	1142541	0.0573248	0.000471867	3.93041	1.14098	0.0727967	3.32618	0.187357
2018	K	HeadWidth	C04_1142548	C04	1142548	0.0541401	0.00082017	3.83569	1.1616	0.0670931	3.0861	0.183057
2017	K	HeadRatio	C04_1478243	C04	1478243	0.278455	0.000569464	0.0410769	0.0120297	0.0462914	3.24453	0.00670672
2019	K	Leaf_Number	C04_1478306	C04	1478306	0.0255814	0.000280705	6.36095	1.77215	0.0581643	3.55175	0.319719
2018	K	HeadRatio	C04_1507914	C04	1507914	0.0636943	0.000959817	-0.0964065	0.0295697	0.0654635	3.01781	0.305004
2018	K + PCO	HeadRatio	C04_1507914	C04	1507914	0.0636943	0.000641454	-0.113226	0.0336853	0.0694346	3.19283	0.420709
2019	K + PCO	Head_Ratio	C04_1507929	C04	1507929	0.0139535	0.000616924	0.217325	0.0641714	0.0519476	3.20977	0.406556
2017	K	LeafLength	C04_1507929	C04	1507929	0.0399306	0.000218597	5.25107	1.43383	0.0455025	3.66036	0.302499
2017	K + PCO	LeafLength	C04_1507929	C04	1507929	0.0399306	0.000205007	5.34374	1.45365	0.0458387	3.68823	0.313271
2018	K	HeadRatio	C04_1507986	C04	1507986	0.0636943	0.000959817	-0.0964065	0.0295697	0.0654635	3.01781	0.264591
2018	K + PCO	HeadRatio	C04_1507986	C04	1507986	0.0636943	0.000641454	-0.113226	0.0336853	0.0694346	3.19283	0.364964
2018	K + PCO	First_LeafLength	C04_1513800	C04	1513800	0.0771429	0.000235538	2.75334	0.761223	0.0720321	3.62794	0.0761528
2018	K	Second_LeafLength	C04_1513800	C04	1513800	0.0771429	0.000166428	3.03424	0.818937	0.0754463	3.77877	0.0735379
2018	K + PCO	Second_LeafLength	C04_1513800	C04	1513800	0.0771429	1.46584e-05	3.69984	0.875156	0.0970885	4.83391	0.109339
2018	K + PCO	First_LeafRatio	C04_1824687	C04	1824687	0.208571	0.000557612	-0.058804	0.0172788	0.0640406	3.25367	0.00549455
2018	K + PCO	First_LeafWidth	C04_1824687	C04	1824687	0.208571	0.000491029	1.1106	0.323258	0.0652254	3.30889	0.00933514
2018	K + PCO	Second_LeafRatio	C04_1824687	C04	1824687	0.208571	0.000451673	-0.0663393	0.0191911	0.0660028	3.34518	0.0058627
2018	K	First_LeafRatio	C04_1824687	C04	1824687	0.208571	0.000390651	-0.0630119	0.0180151	0.0675214	3.40821	0.00630905
2018	K	Second_LeafRatio	C04_1824687	C04	1824687	0.208571	0.000359107	-0.0706388	0.0200749	0.0683072	3.44478	0.00664726
2018	K	First_LeafWidth	C04_1824687	C04	1824687	0.208571	0.000121232	1.25278	0.331505	0.0783661	3.91638	0.0118782
2018	K + PCO	Second_LeafWidth	C04_1824687	C04	1824687	0.208571	6.12299e-05	1.40538	0.357924	0.0843287	4.21304	0.0108291
2018	K	Second_LeafWidth	C04_1824687	C04	1824687	0.208571	1.42754e-05	1.57165	0.370492	0.0977186	4.84541	0.013543
2017	K + PCO	LeafRatio	C04_2816912	C04	2816912	0.0503472	0.000953225	-0.133923	0.0408307	0.0366658	3.0208	0.0331827
2017	K + PCO	LeafRatio	C04_2816957	C04	2816957	0.0520833	0.000858838	-0.133659	0.0404012	0.0372897	3.06609	0.1694
2018	K + PCO	Second_LeafRatio	C04_3404937	C04	3404937	0.1	0.000499089	-0.090553	0.0263886	0.0650738	3.30182	0.0306199
2018	K	HeadHeight	C04_5458448	C04	5458448	0.296178	0.000489006	1.66454	0.484478	0.0724298	3.31069	0.0189524
2018	K	HeadHeight	C04_5458452	C04	5458452	0.292994	0.00078256	1.62596	0.490571	0.067579	3.10648	0.018084
2017	K	LeafRatio	C04_7533147	C04	7533147	0.486111	0.000706717	-0.0605617	0.0180135	0.0384866	3.15075	0.0330272
2019	K + PCO	First_LeafWidth	C04_7533205	C04	7533205	0.304979	0.000855664	-1.25599	0.38013	0.0442887	3.0677	0.0296373
2018	K + PCO	First_LeafWidth	C04_8198108	C04	8198108	0.04	0.000381794	2.51686	0.719334	0.0675643	3.41817	0.295141
2018	K + PCO	First_LeafArea	C04_8198108	C04	8198108	0.04	0.00020564	97.9747	26.8463	0.0732823	3.68689	0.38738
2018	K	Second_LeafLength	C04_8555397	C04	8555397	0.0257143	0.000202402	-4.77348	1.30472	0.0736365	3.69378	0.501807
2018	K + PCO	Second_LeafLength	C04_8555397	C04	8555397	0.0257143	4.01283e-05	-5.38687	1.34063	0.0881321	4.39655	0.639057
2017	K + PCO	HeadWidth	C04_10324001	C04	10324001	0.0630081	0.000893449	-1.52698	0.463689	0.0431263	3.04893	0.107023
2017	K	HeadWidth	C04_10324001	C04	10324001	0.0630081	0.000507107	-1.61482	0.468769	0.0470935	3.2949	0.119689
2018	K + PCO	Second_LeafWidth	C04_14057715	C04	14057715	0.322857	0.000508592	-1.1649	0.339945	0.0648981	3.29363	0.0572694
2018	K + PCO	Second_LeafWidth	C04_14057771	C04	14057771	0.337143	0.000944517	-1.06961	0.327559	0.0591111	3.02479	0.0344266
2017	K	HeadRatio	C04_14057771	C04	14057771	0.331301	0.000878384	0.0428607	0.0129901	0.0432896	3.05632	0.00495632
2018	K + PCO	Second_LeafWidth	C04_14057773	C04	14057773	0.328571	0.000753728	-1.11128	0.334205	0.0612253	3.12279	0.0370142
2018	K + PCO	First_LeafArea	C04_15432163	C04	15432163	0.385714	0.000921302	-45.7823	13.992	0.0593445	3.0356	0.0515411
2018	K + PCO	First_LeafWidth	C04_15432163	C04	15432163	0.385714	0.00028863	-1.32622	0.371721	0.0701554	3.53966	0.0499336
2018	K	HeadRatio	C04_17490145	C04	17490145	0.121019	0.000661412	-0.0665303	0.0198105	0.0693177	3.17953	0.0588403
2019	K + PCO	Head_Area	C04_18121854	C04	18121854	0.223256	0.000885168	-27.1962	8.26351	0.0491308	3.05297	0.0614544
2019	K + PCO	Head_Width	C04_18121854	C04	18121854	0.223256	0.000462346	-1.39526	0.40313	0.0541923	3.33503	0.051648
2018	K	Second_LeafArea	C04_21527153	C04	21527153	0.431429	0.000790124	38.7409	11.6813	0.060917	3.10231	0.044846
2019	K	First_LeafLength	C04_22755745	C04	22755745	0.481328	0.000307149	1.87523	0.525036	0.0515552	3.51265	0.0140165
2018	K + PCO	Second_LeafLength	C04_24397461	C04	24397461	0.0257143	0.000153063	-6.07952	1.6347	0.0759934	3.81513	0.394751
2018	K	Second_LeafRatio	C04_24614733	C04	24614733	0.0257143	0.00058084	0.18814	0.0553864	0.0638086	3.23594	0.165755
2018	K	HeadWidth	C04_25240612	C04	25240612	0.302548	0.000899353	2.38469	0.727561	0.0661383	3.04607	0.0769725
2017	K + PCO	HeadRatio	C04_26122413	C04	26122413	0.0345528	0.000826596	0.109521	0.0330474	0.0436641	3.08271	0.204685
2017	K + PCO	HeadRatio	C04_26122415	C04	26122415	0.0345528	0.000826596	0.109521	0.0330474	0.0436641	3.08271	0.201813
2018	K	Second_LeafLength	C04_26400470	C04	26400470	0.125714	0.000726026	2.08343	0.624011	0.061713	3.13905	0.0235418
2018	K + PCO	Second_LeafLength	C04_26400470	C04	26400470	0.125714	0.000611614	2.14668	0.63521	0.0631781	3.21352	0.0249929
2017	K + PCO	LeafRatio	C04_27893316	C04	27893316	0.109375	6.98443e-05	-0.123749	0.0314866	0.0522212	4.15587	0.0639535
2017	K + PCO	LeafRatio	C04_27893378	C04	27893378	0.107639	7.96196e-05	-0.124548	0.0319337	0.0514473	4.09898	0.15142
2018	K	First_LeafLength	C04_29991862	C04	29991862	0.0485714	0.000797874	-2.9852	0.900814	0.0608251	3.09807	0.212132
2018	K + PCO	First_LeafLength	C04_29991862	C04	29991862	0.0485714	0.000783874	-3.07344	0.927181	0.0608583	3.10575	0.224858
2018	K + PCO	Second_LeafArea	C04_29991862	C04	29991862	0.0485714	0.000639731	-94.7168	28.1237	0.0627584	3.194	0.263148
2018	K	First_LeafArea	C04_29991862	C04	29991862	0.0485714	0.00030283	-85.9856	24.1469	0.0698956	3.5188	0.314978
2018	K	First_LeafWidth	C04_29991862	C04	29991862	0.0485714	0.000216825	-2.49475	0.68497	0.0729988	3.66389	0.306114
2018	K	Second_LeafLength	C04_29991862	C04	29991862	0.0485714	0.000192797	-3.79072	1.03283	0.0740866	3.7149	0.271988
2018	K + PCO	Second_LeafLength	C04_29991862	C04	29991862	0.0485714	0.000166878	-3.94278	1.06595	0.0752012	3.7776	0.294246
2018	K	Second_LeafWidth	C04_29991862	C04	29991862	0.0485714	0.000116539	-2.92994	0.773446	0.078729	3.93353	0.305879
2018	K	Second_LeafArea	C04_29991862	C04	29991862	0.0485714	5.50954e-05	-111.183	28.0999	0.0855755	4.25888	0.362598
2019	K	Second_LeafArea	C04_31591353	C04	31591353	0.0493827	0.000766906	151.964	45.5582	0.0447547	3.11526	0.0434915
2017	K + PCO	LeafWidth	C04_33165351	C04	33165351	0.237847	0.000663741	1.49334	0.442167	0.0388309	3.178	0.00957563
2019	K + PCO	Second_LeafArea	C04_33930986	C04	33930986	0.090535	0.000922158	-111.448	33.9347	0.0434158	3.03519	0.096537
2019	K	Head_Area	C04_35008316	C04	35008316	0.0209302	0.000936084	88.5083	26.9976	0.0487607	3.02869	0.655599
2019	K	Head_Area	C04_35423576	C04	35423576	0.0139535	0.000102171	106.156	27.7113	0.0659786	3.99067	0.584055
2019	K + PCO	Head_Area	C04_35423576	C04	35423576	0.0139535	8.88229e-05	111.506	28.8966	0.0669137	4.05147	0.644405
2018	K + PCO	First_LeafRatio	C04_36159939	C04	36159939	0.08	0.000652107	0.103243	0.0307006	0.0625794	3.18568	0.072464
2017	K + PCO	HeadArea	C04_36343169	C04	36343169	0.046748	0.000159245	43.2944	11.6065	0.0549925	3.79793	0.12235
2017	K + PCO	HeadHeight	C04_36343169	C04	36343169	0.046748	8.96909e-05	1.72041	0.445163	0.0589077	4.04725	0.130852
2017	K	HeadArea	C04_36343169	C04	36343169	0.046748	4.70197e-05	47.8248	11.9145	0.0633979	4.32772	0.149295
2017	K	HeadHeight	C04_36343169	C04	36343169	0.046748	3.15375e-05	1.91173	0.466085	0.0661032	4.50117	0.161574
2019	K	Head_Area	C04_36703622	C04	36703622	0.255814	0.000926739	24.9702	7.61033	0.0488394	3.03304	0.0240982
2019	K	Head_Area	C04_36703634	C04	36703634	0.255814	0.000926739	24.9702	7.61033	0.0488394	3.03304	0.0309592
2018	K + PCO	Second_LeafRatio	C04_37351429	C04	37351429	0.0257143	0.000180547	0.21306	0.0578919	0.0744786	3.74341	0.603574
2018	K	First_LeafRatio	C04_37351429	C04	37351429	0.0257143	0.000142101	0.200168	0.0534897	0.0769041	3.8474	0.635444
2018	K	Second_LeafRatio	C04_37351429	C04	37351429	0.0257143	3.62878e-06	0.268861	0.0596057	0.109759	5.44024	0.961132
2019	K	Head_Ratio	C04_37727704	C04	37727704	0.213953	0.000960486	0.0699992	0.0213972	0.0485589	3.01751	0.0355941
2018	K	First_LeafLength	C04_40272416	C04	40272416	0.14	0.000648728	1.82017	0.540397	0.062771	3.18794	0.106599
2018	K + PCO	First_LeafLength	C04_40272416	C04	40272416	0.14	0.000499284	1.92073	0.559747	0.0650701	3.30165	0.118702
2018	K	First_LeafRatio	C04_40316432	C04	40316432	0.0314286	4.32239e-05	0.221902	0.0553418	0.0877766	4.36428	0.18322
2018	K	First_LeafRatio	C04_40478277	C04	40478277	0.16	0.000389059	0.0757413	0.0216481	0.0675595	3.40998	0.0120012
2018	K	Second_LeafRatio	C04_40478277	C04	40478277	0.16	0.000347559	0.0850801	0.0241233	0.0686121	3.45897	0.0126956
2019	K + PCO	First_LeafRatio	C04_40577243	C04	40577243	0.400415	0.000732398	0.0537968	0.0160795	0.0453842	3.13525	0.0154123
2017	K	HeadRatio	C04_40577243	C04	40577243	0.376016	0.000172807	0.0546543	0.0147181	0.054512	3.76244	0.0331778
2019	K + PCO	Head_Ratio	C04_40577243	C04	40577243	0.402326	0.000103624	0.0770232	0.0201449	0.0657346	3.98454	0.0260521
2019	K	Head_Ratio	C04_40577243	C04	40577243	0.402326	2.02933e-06	0.0910589	0.0196106	0.0954182	5.69265	0.036412
2018	K + PCO	Second_LeafWidth	C05_2023597	C05	2023597	0.0742857	0.000119284	2.08712	0.552627	0.0782736	3.92342	0.0408489
2018	K + PCO	Second_LeafWidth	C05_2023699	C05	2023699	0.0742857	0.000119284	2.08712	0.552627	0.0782736	3.92342	0.0375346
2017	K	HeadHeight	C05_5722055	C05	5722055	0.0223577	0.000460524	2.55184	0.735469	0.0477596	3.33675	0.469538
2017	K	HeadArea	C05_5722055	C05	5722055	0.0223577	5.6957e-06	84.2002	18.8926	0.0775694	5.24445	0.754765
2018	K	First_LeafArea	C05_5849807	C05	5849807	0.174286	0.000935188	43.9021	13.4192	0.0593291	3.0291	0.0216098
2018	K + PCO	First_LeafWidth	C05_5849807	C05	5849807	0.174286	0.000510897	1.24728	0.364109	0.064856	3.29167	0.0201378
2018	K + PCO	First_LeafArea	C05_5849807	C05	5849807	0.174286	0.000248028	48.6537	13.4978	0.0715556	3.6055	0.0265407
2018	K + PCO	First_LeafWidth	C05_5849828	C05	5849828	0.0457143	0.000547876	2.27144	0.666552	0.0642048	3.26132	0.102854
2018	K + PCO	First_LeafArea	C05_5849828	C05	5849828	0.0457143	0.000518485	85.765	25.0641	0.0647187	3.28526	0.12701
2018	K	HeadWidth	C05_7349446	C05	7349446	0.267516	0.0007832	-2.69435	0.812968	0.0675706	3.10613	0.0447617
2019	K + PCO	Head_Width	C05_8096719	C05	8096719	0.027907	0.000880779	3.0898	0.938453	0.0491696	3.05513	0.144693
2019	K	Head_Width	C05_8096735	C05	8096735	0.0232558	0.000994822	3.22015	0.987202	0.0482834	3.00225	0.337817
2019	K + PCO	Head_Width	C05_8096735	C05	8096735	0.0232558	0.000334652	3.60663	1.01807	0.0567013	3.47541	0.423774
2019	K	Head_Width	C05_8096776	C05	8096776	0.0232558	0.000994822	3.22015	0.987202	0.0482834	3.00225	0.33425
2019	K + PCO	Head_Width	C05_8096776	C05	8096776	0.0232558	0.000334652	3.60663	1.01807	0.0567013	3.47541	0.4193
2017	K	HeadArea	C05_8243213	C05	8243213	0.0121951	6.43041e-05	108.507	27.5129	0.0612702	4.19176	0.18054
2018	K + PCO	HeadWidth	C05_9699871	C05	9699871	0.0828025	0.000491663	5.0072	1.46026	0.0721555	3.30833	0.237823
2019	K + PCO	Second_LeafRatio	C05_11853336	C05	11853336	0.0390947	0.0008269	0.112102	0.0338312	0.0441783	3.08255	0.0417807
2019	K + PCO	Second_LeafRatio	C05_11853395	C05	11853395	0.0390947	0.0008269	0.112102	0.0338312	0.0441783	3.08255	0.0382306
2017	K + PCO	HeadHeight	C05_13199087	C05	13199087	0.0304878	0.00097525	-1.89713	0.58027	0.0425203	3.01088	0.219545
2018	K + PCO	Second_LeafRatio	C05_14865799	C05	14865799	0.0228571	0.000902649	-0.175472	0.0535386	0.0595364	3.04448	0.345004
2018	K	First_LeafRatio	C05_15151461	C05	15151461	0.0628571	0.00033382	0.104013	0.0294081	0.0689881	3.47649	0.0918133
2018	K	First_LeafWidth	C05_15151461	C05	15151461	0.0628571	0.00016309	-1.94672	0.524742	0.0756334	3.78757	0.153187
2018	K + PCO	First_LeafWidth	C05_15151461	C05	15151461	0.0628571	0.000150688	-1.81825	0.488424	0.0761367	3.82192	0.133636
2018	K + PCO	First_LeafRatio	C05_16991125	C05	16991125	0.0371429	0.000445803	0.163507	0.0472554	0.0661244	3.35086	0.167381
2018	K	Second_LeafRatio	C05_16991125	C05	16991125	0.0371429	0.000120809	0.196821	0.0520708	0.0783983	3.9179	0.203334
2018	K	First_LeafRatio	C05_16991125	C05	16991125	0.0371429	7.91423e-06	0.203738	0.046728	0.102939	5.10159	0.259883
2017	K	LeafLength	C05_17241193	C05	17241193	0.0538194	0.00086659	4.37965	1.3243	0.0372645	3.06219	0.160778
2019	K + PCO	First_LeafWidth	C05_19794063	C05	19794063	0.0477178	0.000993027	-3.08023	0.943742	0.0432395	3.00304	0.252779
2019	K + PCO	First_LeafWidth	C05_19794082	C05	19794082	0.0477178	0.000993027	-3.08023	0.943742	0.0432395	3.00304	0.0383891
2019	K	Head_Width	C05_20992052	C05	20992052	0.0302326	0.000495659	3.85666	1.11916	0.0537358	3.30482	0.0798194
2019	K + PCO	First_LeafRatio	C05_22644035	C05	22644035	0.0705394	0.000121785	0.100322	0.0264524	0.0579361	3.91441	0.137111
2019	K	First_LeafRatio	C05_22644035	C05	22644035	0.0705394	2.12175e-05	0.110576	0.0264191	0.0701095	4.6733	0.166571
2019	K + PCO	Head_Height	C05_25338191	C05	25338191	0.460465	0.000498354	-1.02014	0.296393	0.0536092	3.30246	0.0234904
2019	K	Head_Height	C05_25338191	C05	25338191	0.460465	0.0001	-1.08802	0.283652	0.0661438	4	0.0267204
2018	K	Second_LeafLength	C05_26072187	C05	26072187	0.0542857	0.000964388	-3.10442	0.9513	0.0590392	3.01575	0.0839173
2019	K	Second_LeafArea	C05_26077312	C05	26077312	0.117284	0.000627152	-114.492	33.784	0.0461636	3.20263	0.0650405
2019	K	Second_LeafWidth	C05_26077312	C05	26077312	0.117284	0.00014356	-2.6646	0.709203	0.0564369	3.84297	0.0779183
2019	K	First_LeafArea	C05_26114270	C05	26114270	0.0954357	0.000251167	-119.577	33.0184	0.0529671	3.60004	0.108511
2019	K + PCO	Second_LeafArea	C05_26114270	C05	26114270	0.0946502	0.000212968	-156.965	42.8912	0.0536229	3.67169	0.134025
2019	K	First_LeafWidth	C05_26114270	C05	26114270	0.0954357	0.000146834	-2.87499	0.76637	0.0567233	3.83317	0.108547
2019	K + PCO	Second_LeafWidth	C05_26114270	C05	26114270	0.0946502	5.27556e-05	-3.55079	0.891251	0.063232	4.27773	0.151695
2019	K	Second_LeafArea	C05_26114270	C05	26114270	0.0946502	1.07625e-05	-171.038	39.5234	0.0741722	4.96809	0.159133
2019	K	Second_LeafWidth	C05_26114270	C05	26114270	0.0946502	2.42602e-06	-3.82342	0.827273	0.0841496	5.6151	0.175884
2019	K	Second_LeafWidth	C05_26119579	C05	26119579	0.119342	0.000494758	-2.24743	0.651281	0.0478225	3.30561	0.0279568
2019	K	Second_LeafArea	C05_26119615	C05	26119615	0.123457	0.000748724	-105.512	31.5715	0.0449228	3.12568	0.0278596
2019	K	Second_LeafWidth	C05_26119615	C05	26119615	0.123457	0.000281977	-2.36464	0.658081	0.0517463	3.54979	0.0309489
2018	K + PCO	HeadRatio	C05_26431269	C05	26431269	0.0573248	0.000376603	0.118868	0.0340062	0.0748722	3.42412	0.0745154
2017	K + PCO	LeafArea	C05_26867188	C05	26867188	0.0607639	0.000697726	141.532	42.072	0.0385324	3.15631	0.110448
2017	K	LeafArea	C05_26867188	C05	26867188	0.0607639	0.00032459	148.29	41.6095	0.0431426	3.48867	0.121248
2017	K + PCO	LeafLength	C05_26867188	C05	26867188	0.0607639	5.21262e-05	4.28271	1.07163	0.0539474	4.28294	0.14916
2017	K	LeafLength	C05_26867188	C05	26867188	0.0607639	9.99551e-06	4.57345	1.05035	0.0637109	5.00019	0.1701
2019	K	Head_Width	C05_27602191	C05	27602191	0.395349	0.000620878	-1.2837	0.378943	0.0519758	3.20699	0.0287693
2019	K + PCO	Head_Diameter	C05_27602191	C05	27602191	0.395349	0.000234567	-1.20409	0.331697	0.0594509	3.62973	0.0356131
2019	K + PCO	Head_Area	C05_27602191	C05	27602191	0.395349	0.000168142	-30.6577	8.26316	0.0620182	3.77432	0.0513897
2019	K + PCO	Head_Width	C05_27602191	C05	27602191	0.395349	0.000122135	-1.52757	0.403544	0.0644749	3.91316	0.0407385
2019	K	Head_Ratio	C05_28268600	C05	28268600	0.148837	0.000518591	0.0780287	0.0227199	0.0533826	3.28518	0.0279464
2018	K	Second_LeafRatio	C05_28862315	C05	28862315	0.12	0.000731664	0.0942254	0.0282388	0.0616402	3.13569	0.0138483
2017	K	HeadArea	C05_29605426	C05	29605426	0.0345528	0.00089998	54.6908	16.6086	0.0431212	3.04577	0.0897907
2017	K + PCO	HeadArea	C05_29605426	C05	29605426	0.0345528	0.000610031	55.2999	16.2905	0.0457628	3.21465	0.0918019
2019	K	First_LeafRatio	C05_30005311	C05	30005311	0.0912863	0.000328338	0.0723373	0.0203485	0.0510866	3.48368	0.0325263
2019	K	First_LeafRatio	C05_30005314	C05	30005314	0.0912863	0.000328338	0.0723373	0.0203485	0.0510866	3.48368	0.0723486
2019	K	First_LeafRatio	C05_30005341	C05	30005341	0.0912863	0.000328338	0.0723373	0.0203485	0.0510866	3.48368	0.0723486
2018	K + PCO	First_LeafRatio	C05_30691382	C05	30691382	0.125714	0.000997796	0.0599926	0.0184553	0.0585962	3.00096	0.0534594
2019	K	Second_LeafWidth	C05_32097594	C05	32097594	0.141975	0.000353402	1.98824	0.56217	0.0501723	3.45173	0.0252249
2019	K + PCO	Second_LeafRatio	C05_32097594	C05	32097594	0.141975	0.000345124	-0.0609231	0.0172084	0.0502718	3.46202	0.0145584
2019	K + PCO	Second_LeafWidth	C05_32097594	C05	32097594	0.141975	0.0002511	2.05512	0.567814	0.052481	3.60015	0.0269505
2018	K	First_LeafRatio	C05_32097629	C05	32097629	0.0257143	0.000291186	0.18867	0.0528405	0.0702605	3.53583	0.146777
2019	K	Second_LeafWidth	C05_32097678	C05	32097678	0.144033	0.000340005	1.98804	0.560571	0.0504419	3.46851	0.0271203
2019	K + PCO	Second_LeafRatio	C05_32097678	C05	32097678	0.144033	0.000303222	-0.0613058	0.0171596	0.0511715	3.51824	0.0158527
2019	K + PCO	Second_LeafWidth	C05_32097678	C05	32097678	0.144033	0.000230882	2.06223	0.566559	0.0530632	3.63661	0.0291824
2018	K	First_LeafRatio	C05_32099200	C05	32099200	0.0285714	0.000422332	0.181094	0.0520663	0.0667929	3.37435	0.145756
2018	K	First_LeafRatio	C05_32099305	C05	32099305	0.0285714	0.000422332	0.181094	0.0520663	0.0667929	3.37435	0.0610141
2019	K + PCO	Second_LeafArea	C05_32352509	C05	32352509	0.257202	0.00069444	74.2485	22.0973	0.0453982	3.15837	0.0384407
2019	K + PCO	Second_LeafWidth	C05_32352509	C05	32352509	0.257202	0.000680654	1.5523	0.461257	0.0455383	3.16707	0.037163
2018	K	First_LeafRatio	C05_32356189	C05	32356189	0.1	0.000328841	0.0968075	0.0273421	0.0691281	3.48301	0.171542
2019	K	Second_LeafRatio	C06_1057635	C06	1057635	0.0596708	0.000712294	-0.0932826	0.0278017	0.0452722	3.14734	0.0685463
2019	K + PCO	First_LeafRatio	C06_1057635	C06	1057635	0.060166	0.000544318	-0.0969648	0.0283224	0.0474716	3.26415	0.069586
2019	K + PCO	Second_LeafRatio	C06_1057635	C06	1057635	0.0596708	0.000114016	-0.106807	0.0280451	0.0579404	3.94303	0.0898632
2018	K	First_LeafLength	C06_1613049	C06	1613049	0.0685714	0.00099906	2.13112	0.654956	0.058706	3.00041	0.046503
2018	K + PCO	Second_LeafLength	C06_1613049	C06	1613049	0.0685714	0.000343093	2.67487	0.758749	0.0685554	3.46459	0.0582527
2018	K	Second_LeafLength	C06_1613049	C06	1613049	0.0685714	0.000205349	2.74481	0.750941	0.0735027	3.68751	0.0613389
2018	K	Second_LeafWidth	C06_3411755	C06	3411755	0.197143	0.00055808	1.24582	0.365647	0.0641835	3.2533	0.0577306
2018	K	Second_LeafArea	C06_3411755	C06	3411755	0.197143	0.000254066	47.7962	13.2626	0.0715282	3.59505	0.0699511
2018	K	Second_LeafWidth	C06_3411766	C06	3411766	0.197143	0.00055808	1.24582	0.365647	0.0641835	3.2533	0.0577306
2018	K	Second_LeafArea	C06_3411766	C06	3411766	0.197143	0.000254066	47.7962	13.2626	0.0715282	3.59505	0.0699511
2019	K	First_LeafLength	C06_4201830	C06	4201830	0.0995851	0.000753135	2.52222	0.755109	0.0452391	3.12313	0.00929943
2017	K + PCO	LeafLength	C06_6772214	C06	6772214	0.0416667	0.000144702	4.86237	1.29311	0.0479085	3.83953	0.14715
2017	K	LeafLength	C06_6772214	C06	6772214	0.0416667	9.69751e-05	4.9543	1.28456	0.0503383	4.01334	0.152766
2018	K + PCO	Second_LeafArea	C06_10190585	C06	10190585	0.171429	0.000598421	-54.7893	16.1854	0.0633817	3.22299	0.109486
2018	K	Second_LeafArea	C06_10190585	C06	10190585	0.171429	0.000237992	-57.3332	15.8393	0.072135	3.62344	0.119889
2018	K + PCO	Second_LeafArea	C06_10190681	C06	10190681	0.402857	0.000672269	-40.0905	11.9495	0.0622949	3.17246	0.0595391
2018	K	Second_LeafArea	C06_10190681	C06	10190681	0.402857	0.000638523	-39.8417	11.8143	0.0629199	3.19482	0.0588024
2018	K + PCO	HeadRatio	C06_10365289	C06	10365289	0.0573248	0.000761702	0.0804109	0.0242438	0.0676712	3.11821	0.020351
2018	K	HeadRatio	C06_10365289	C06	10365289	0.0573248	0.000584252	0.0777781	0.022941	0.0705975	3.2334	0.0190401
2018	K	First_LeafRatio	C06_10613030	C06	10613030	0.0228571	0.000532853	0.206334	0.0603484	0.0646172	3.27339	0.602681
2018	K + PCO	Second_LeafArea	C06_13581675	C06	13581675	0.482857	0.000936223	38.0042	11.6301	0.0591939	3.02862	0.0374687
2018	K	Second_LeafArea	C06_13581675	C06	13581675	0.482857	0.000677721	38.7439	11.5419	0.0623602	3.16895	0.0389415
2018	K + PCO	Second_LeafArea	C06_13581695	C06	13581695	0.482857	0.000936223	38.0042	11.6301	0.0591939	3.02862	0.0458988
2018	K	Second_LeafArea	C06_13581695	C06	13581695	0.482857	0.000677721	38.7439	11.5419	0.0623602	3.16895	0.0477029
2017	K	HeadHeight	C06_13973756	C06	13973756	0.0752033	0.000893938	1.50239	0.455998	0.0431679	3.04869	0.0578864
2018	K	First_LeafRatio	C06_16863397	C06	16863397	0.0257143	0.000358771	0.196178	0.0557485	0.068316	3.44518	0.30216
2018	K + PCO	HeadArea	C06_17566702	C06	17566702	0.353503	0.000890916	48.0977	14.6835	0.0660592	3.05016	0.0112081
2018	K	HeadHeight	C06_17566702	C06	17566702	0.353503	0.00037167	1.58358	0.451868	0.0752459	3.42984	0.0116471
2019	K + PCO	Head_Ratio	C06_17566702	C06	17566702	0.383721	0.000124862	0.0681199	0.01802	0.0643055	3.90357	0.0677001
2018	K + PCO	HeadHeight	C06_17566702	C06	17566702	0.353503	4.1358e-05	1.91188	0.477902	0.0969161	4.38344	0.0169768
2017	K	LeafRatio	C06_18209296	C06	18209296	0.0243056	0.000132879	0.235754	0.0623258	0.048467	3.87654	0.0643722
2017	K + PCO	LeafRatio	C06_18209296	C06	18209296	0.0243056	0.000129407	0.237918	0.0628287	0.0485713	3.88804	0.0655595
2018	K	Second_LeafRatio	C06_19534119	C06	19534119	0.0257143	0.000360881	0.186722	0.0530834	0.0682613	3.44264	0.145904
2017	K	HeadArea	C06_19815947	C06	19815947	0.046748	0.000276936	49.8015	13.8407	0.0512688	3.55762	0.0890466
2017	K	HeadHeight	C06_19815947	C06	19815947	0.046748	5.89757e-05	2.13296	0.53817	0.0618587	4.22933	0.110631
2018	K + PCO	First_LeafRatio	C06_20153971	C06	20153971	0.24	0.000639745	-0.0512023	0.0152032	0.0627582	3.19399	0.00333119
2017	K + PCO	LeafArea	C06_20162376	C06	20162376	0.175347	0.000971336	105.905	32.3391	0.0365531	3.01263	0.0807264
2019	K	Head_Ratio	C06_20162376	C06	20162376	0.127907	0.000613277	0.0772114	0.0227709	0.0520721	3.21234	0.0794333
2019	K + PCO	Head_Ratio	C06_20162376	C06	20162376	0.127907	0.000340647	0.0797519	0.0225404	0.0565636	3.4677	0.0847463
2018	K	HeadRatio	C06_20997416	C06	20997416	0.187898	0.000416718	0.069334	0.0199464	0.0740731	3.38016	0.0332021
2018	K + PCO	HeadRatio	C06_20997416	C06	20997416	0.187898	0.000368871	0.0712416	0.0203514	0.0750831	3.43312	0.0350542
2018	K + PCO	HeadArea	C06_21138722	C06	21138722	0.191083	0.000786634	-49.7192	15.0284	0.0673401	3.10423	0.0282311
2018	K	HeadArea	C06_21138722	C06	21138722	0.191083	0.000404499	-51.8224	14.8767	0.0743784	3.39308	0.03067
2018	K + PCO	HeadWidth	C06_21138722	C06	21138722	0.191083	0.000252287	-2.33919	0.651057	0.0789332	3.59811	0.0367119
2018	K	HeadWidth	C06_21138722	C06	21138722	0.191083	0.000143514	-2.37074	0.635121	0.0849236	3.84311	0.0377092
2017	K + PCO	HeadWidth	C06_21270274	C06	21270274	0.308943	0.000524296	0.910747	0.265208	0.0468078	3.28042	0.0453944
2017	K + PCO	LeafWidth	C06_21270274	C06	21270274	0.295139	8.84153e-05	2.0344	0.524869	0.0508276	4.05347	0.0630727
2017	K	LeafWidth	C06_21270274	C06	21270274	0.295139	6.7833e-05	2.06748	0.524831	0.0524569	4.16856	0.0651407
2017	K + PCO	LeafArea	C06_21270274	C06	21270274	0.295139	6.65805e-05	100.712	25.554	0.0525038	4.17665	0.0640757
2017	K	LeafArea	C06_21270274	C06	21270274	0.295139	4.61804e-05	102.641	25.4935	0.0547302	4.33554	0.0665542
2018	K	First_LeafRatio	C06_23246106	C06	23246106	0.04	0.000650368	0.149089	0.0442723	0.0627473	3.18684	0.0483381
2017	K	LeafLength	C06_25809275	C06	25809275	0.0347222	0.00077612	5.1181	1.53378	0.0379253	3.11007	0.213553
2017	K + PCO	LeafLength	C06_25809275	C06	25809275	0.0347222	0.000576184	5.39862	1.58102	0.0396766	3.23944	0.237604
2017	K	HeadArea	C06_25809275	C06	25809275	0.0101626	0.000359559	95.5022	27.0331	0.0494687	3.44423	0.892645
2017	K + PCO	LeafRatio	C06_26143881	C06	26143881	0.03125	0.000602614	-0.196419	0.0577222	0.0394085	3.21996	0.029984
2019	K	Head_Ratio	C06_26520851	C06	26520851	0.246512	0.000924259	0.0649789	0.0197997	0.0488604	3.03421	0.0503026
2019	K	Leaf_Number	C06_26970130	C06	26970130	0.0209302	0.000798275	7.14121	2.15022	0.0500088	3.09785	0.503396
2019	K + PCO	Leaf_Number	C06_26970130	C06	26970130	0.0209302	0.000357698	7.89923	2.24031	0.0561849	3.44648	0.615937
2018	K + PCO	HeadWidth	C06_27560348	C06	27560348	0.159236	0.000900293	3.06398	0.936177	0.0659514	3.04562	0.00902657
2018	K	HeadWidth	C06_27560348	C06	27560348	0.159236	0.000334502	3.20097	0.906644	0.0763244	3.4756	0.00985179
2019	K	Leaf_Number	C06_27707474	C06	27707474	0.127907	0.000259804	2.68817	0.744963	0.0587653	3.58535	0.00845276
2019	K + PCO	Leaf_Number	C06_27707474	C06	27707474	0.127907	0.000162716	2.74844	0.739235	0.0622707	3.78857	0.00883608
2017	K	LeafRatio	C06_29532018	C06	29532018	0.0798611	0.000257152	-0.12885	0.0355728	0.0445334	3.58981	0.123485
2017	K + PCO	LeafRatio	C06_29532018	C06	29532018	0.0798611	0.000100119	-0.140358	0.0364839	0.0500919	3.99948	0.146528
2017	K	LeafRatio	C06_33839830	C06	33839830	0.03125	0.000440258	0.159097	0.0456371	0.0413202	3.35629	0.0194042
2017	K	LeafRatio	C06_33839893	C06	33839893	0.03125	0.000440258	0.159097	0.0456371	0.0413202	3.35629	0.0693014
2018	K	First_LeafRatio	C06_34239307	C06	34239307	0.137143	0.000554553	0.072618	0.0213031	0.064243	3.25606	0.0700358
2018	K + PCO	HeadRatio	C06_37425052	C06	37425052	0.117834	0.000847673	0.0868742	0.0264156	0.0665714	3.07177	0.174937
2017	K + PCO	HeadRatio	C06_37644307	C06	37644307	0.132114	0.000635437	0.0715712	0.0211505	0.0454812	3.19693	0.0509361
2018	K	Second_LeafWidth	C06_37698105	C06	37698105	0.0257143	0.00028709	3.92743	1.09888	0.0703923	3.54198	0.291343
2018	K + PCO	Second_LeafWidth	C06_37698105	C06	37698105	0.0257143	6.42305e-05	4.08449	1.04304	0.0838965	4.19226	0.31511
2017	K + PCO	HeadRatio	C06_37836471	C06	37836471	0.132114	0.00054088	0.0729099	0.0212813	0.046593	3.2669	0.0734358
2017	K + PCO	LeafLength	C06_38869323	C06	38869323	0.0555556	0.000769015	-4.75346	1.42402	0.0379505	3.11406	0.195537
2019	K + PCO	Second_LeafLength	C06_38869323	C06	38869323	0.0390947	0.000371836	-5.10727	1.4503	0.0497532	3.42965	0.261011
2019	K + PCO	First_LeafLength	C06_38869323	C06	38869323	0.0394191	0.000358082	-4.70335	1.33213	0.0504105	3.44602	0.282111
2019	K	First_LeafLength	C06_38869323	C06	38869323	0.0394191	0.000154222	-4.93737	1.32024	0.0563805	3.81185	0.310883
2019	K	Second_LeafLength	C06_38869323	C06	38869323	0.0390947	0.000143248	-5.41704	1.44159	0.0564519	3.84391	0.293634
2017	K	LeafLength	C06_38869323	C06	38869323	0.0555556	0.000108173	-5.19476	1.3559	0.0496895	3.96588	0.233528
2019	K	Head_Width	C06_39750271	C06	39750271	0.044186	0.000996272	2.27593	0.697818	0.048272	3.00162	0.151995
2019	K	Head_Width	C06_39790762	C06	39790762	0.0418605	0.000239891	2.32151	0.639886	0.0593842	3.61999	0.165047
2017	K	HeadRatio	C06_40369887	C06	40369887	0.0264228	0.000728816	0.119291	0.0356141	0.0445832	3.13738	0.240362
2019	K	Leaf_Number	C07_260514	C07	260514	0.109302	0.000651933	3.0753	0.911259	0.0515941	3.1858	0.0253636
2017	K	HeadRatio	C07_655881	C07	655881	0.0894309	0.000989252	0.0685362	0.0209769	0.0424653	3.00469	0.0848391
2017	K	LeafRatio	C07_854402	C07	854402	0.0416667	0.000479886	0.159441	0.0460301	0.0408045	3.31886	0.219171
2018	K	HeadRatio	C07_1894538	C07	1894538	0.219745	0.000303028	0.0659764	0.0185598	0.0773344	3.51852	0.0351749
2018	K + PCO	HeadRatio	C07_1894538	C07	1894538	0.219745	6.62502e-05	0.0819115	0.0210085	0.0922874	4.17881	0.0542181
2018	K + PCO	HeadWidth	C07_1968560	C07	1968560	0.219745	0.00078361	2.62783	0.79406	0.0673797	3.1059	0.0238764
2019	K + PCO	Head_Height	C07_5780048	C07	5780048	0.0976744	0.000966169	-1.66831	0.510572	0.0484465	3.01495	0.0656873
2019	K + PCO	Head_Height	C07_5845931	C07	5845931	0.0883721	0.000854399	-1.73395	0.525346	0.0494071	3.06834	0.0259546
2019	K	First_LeafArea	C07_7951948	C07	7951948	0.46473	0.000701658	54.3943	16.1934	0.0457389	3.15387	0.032082
2019	K + PCO	First_LeafWidth	C07_7951948	C07	7951948	0.46473	0.000412499	1.34507	0.384867	0.0494186	3.38458	0.0339477
2019	K	First_LeafWidth	C07_7951948	C07	7951948	0.46473	0.000392288	1.32117	0.376404	0.0498357	3.40639	0.0327524
2019	K + PCO	First_LeafLength	C07_7951948	C07	7951948	0.46473	0.00024134	1.80932	0.498612	0.0531713	3.61737	0.0277556
2019	K	First_LeafLength	C07_7951948	C07	7951948	0.46473	6.58103e-05	1.94814	0.494762	0.0623069	4.18171	0.0321781
2019	K	Head_Height	C07_12041055	C07	12041055	0.0627907	0.00069334	1.98749	0.591768	0.0511123	3.15905	0.224076
2019	K + PCO	First_LeafRatio	C07_12612884	C07	12612884	0.23444	0.000927073	-0.0498309	0.0151808	0.0437239	3.03289	0.00640303
2019	K + PCO	First_LeafRatio	C07_12612902	C07	12612902	0.23444	0.000927073	-0.0498309	0.0151808	0.0437239	3.03289	0.0184758
2019	K + PCO	First_LeafRatio	C07_12612912	C07	12612912	0.23444	0.000927073	-0.0498309	0.0151808	0.0437239	3.03289	0.021355
2018	K + PCO	Second_LeafLength	C07_12918563	C07	12918563	0.0342857	0.000423457	4.3516	1.25298	0.0666025	3.37319	0.375362
2018	K	Second_LeafLength	C07_12918563	C07	12918563	0.0342857	0.000411983	4.22504	1.21256	0.0670247	3.38512	0.353846
2019	K + PCO	Head_Height	C07_13006458	C07	13006458	0.027907	0.000288364	2.77078	0.774064	0.0578543	3.54006	0.491911
2019	K	Head_Height	C07_13006458	C07	13006458	0.027907	0.000251706	2.74522	0.759137	0.0590111	3.59911	0.482876
2019	K	Head_Weight	C07_13040374	C07	13040374	0.197674	0.000608943	0.255765	0.075388	0.0521276	3.21542	0.0669547
2019	K	Head_Diameter	C07_13040374	C07	13040374	0.197674	0.000478733	1.15495	0.334286	0.054007	3.31991	0.0492805
2019	K + PCO	Head_Diameter	C07_13040374	C07	13040374	0.197674	0.000437824	1.16641	0.335662	0.0546158	3.3587	0.0502632
2018	K	Second_LeafRatio	C07_14195376	C07	14195376	0.0257143	0.000244746	0.197515	0.0546692	0.0718752	3.61128	0.408505
2018	K	Second_LeafRatio	C07_14416174	C07	14416174	0.0257143	0.000989398	0.187542	0.0575909	0.0587977	3.00463	0.331926
2018	K	Second_LeafWidth	C07_16140290	C07	16140290	0.257143	0.000843733	-1.25868	0.381525	0.0602989	3.0738	0.0247255
2017	K + PCO	HeadArea	C07_17303492	C07	17303492	0.0752033	0.000425094	39.5054	11.326	0.0482535	3.37151	0.111628
2018	K + PCO	HeadArea	C07_17459019	C07	17459019	0.0987261	0.000850997	68.6179	20.871	0.0665312	3.07007	0.0287996
2019	K	Head_Ratio	C07_20433109	C07	20433109	0.0325581	0.00068595	-0.105866	0.0314946	0.0511961	3.16371	0.043673
2017	K + PCO	HeadHeight	C07_20433109	C07	20433109	0.0304878	0.000523498	-1.77619	0.517163	0.0468183	3.28108	0.0503457
2019	K + PCO	Head_Ratio	C07_20433109	C07	20433109	0.0325581	0.000289686	-0.111174	0.0310681	0.0578189	3.53807	0.0481626
2018	K	HeadHeight	C07_23591068	C07	23591068	0.0191083	0.000801018	4.55644	1.37728	0.0673377	3.09636	0.0591779
2018	K + PCO	HeadHeight	C07_23591068	C07	23591068	0.0191083	0.00063851	4.72039	1.40385	0.0694818	3.19483	0.0635131
2018	K	HeadHeight	C07_23591093	C07	23591093	0.0191083	0.000801018	4.55644	1.37728	0.0673377	3.09636	0.155962
2018	K + PCO	HeadHeight	C07_23591093	C07	23591093	0.0191083	0.00063851	4.72039	1.40385	0.0694818	3.19483	0.167387
2018	K	HeadHeight	C07_24862202	C07	24862202	0.251592	0.000452278	-1.58625	0.459055	0.0732323	3.34459	0.0266842
2018	K	HeadArea	C07_24862202	C07	24862202	0.251592	0.000205715	-51.5077	14.1187	0.0812786	3.68673	0.0293497
2018	K + PCO	HeadHeight	C07_24862202	C07	24862202	0.251592	7.65941e-05	-1.80152	0.465863	0.0908538	4.1158	0.0344184
2018	K + PCO	HeadArea	C07_24862202	C07	24862202	0.251592	2.74269e-05	-58.9548	14.4258	0.100917	4.56182	0.0384501
2018	K + PCO	HeadHeight	C07_24862251	C07	24862251	0.334395	0.000146616	-1.61551	0.434219	0.0843917	3.83382	0.00885839
2018	K + PCO	HeadArea	C07_24862251	C07	24862251	0.334395	0.000136844	-50.133	13.4175	0.0850817	3.86377	0.00889873
2018	K	HeadHeight	C07_24862297	C07	24862297	0.248408	0.000894505	-1.52317	0.464508	0.0661943	3.04842	0.0827313
2018	K	HeadArea	C07_24862297	C07	24862297	0.248408	0.000391509	-49.8825	14.2864	0.074713	3.40726	0.0925592
2018	K + PCO	HeadHeight	C07_24862297	C07	24862297	0.248408	0.000164239	-1.74404	0.4721	0.0832544	3.78452	0.108465
2018	K + PCO	HeadArea	C07_24862297	C07	24862297	0.248408	5.17018e-05	-57.79	14.62	0.0947283	4.28649	0.124231
2019	K + PCO	First_LeafRatio	C07_25114126	C07	25114126	0.0414938	0.0007866	0.114538	0.0344302	0.0448815	3.10425	0.221783
2018	K + PCO	Second_LeafLength	C07_26016735	C07	26016735	0.04	0.000958367	3.01464	0.92431	0.0589745	3.01847	0.0322091
2018	K	Second_LeafLength	C07_26016735	C07	26016735	0.04	0.000872482	2.99512	0.91033	0.0599833	3.05924	0.0317934
2018	K	First_LeafWidth	C07_28112321	C07	28112321	0.117143	0.000976307	-1.47352	0.451994	0.0589233	3.01041	0.0373839
2018	K + PCO	Second_LeafWidth	C07_28112321	C07	28112321	0.117143	0.000660479	-1.72032	0.512064	0.0624603	3.18014	0.0369144
2018	K + PCO	First_LeafArea	C07_28112321	C07	28112321	0.117143	0.000469551	-58.601	17.0007	0.0656417	3.32832	0.0512131
2018	K + PCO	First_LeafLength	C07_28112321	C07	28112321	0.117143	0.000393633	-2.15759	0.617995	0.0672808	3.40491	0.0387917
2018	K	First_LeafArea	C07_28112321	C07	28112321	0.117143	0.000380721	-55.9713	15.9728	0.0677618	3.41939	0.04672
2018	K	Second_LeafWidth	C07_28112321	C07	28112321	0.117143	0.000302164	-1.80767	0.507561	0.0699161	3.51976	0.0407579
2018	K	Second_LeafLength	C07_28112321	C07	28112321	0.117143	0.000185386	-2.45524	0.667267	0.0744492	3.73192	0.0399427
2018	K	Second_LeafArea	C07_28112321	C07	28112321	0.117143	2.41168e-05	-76.1295	18.416	0.093035	4.61768	0.0595106
2018	K + PCO	Second_LeafLength	C07_28112321	C07	28112321	0.117143	2.08024e-05	-2.95293	0.710491	0.0939928	4.68189	0.0577771
2018	K + PCO	Second_LeafArea	C07_28112321	C07	28112321	0.117143	1.35039e-05	-82.3718	19.4082	0.0978112	4.86954	0.0696699
2018	K	First_LeafWidth	C07_28112333	C07	28112333	0.117143	0.000976307	-1.47352	0.451994	0.0589233	3.01041	0.0401489
2018	K + PCO	Second_LeafWidth	C07_28112333	C07	28112333	0.117143	0.000660479	-1.72032	0.512064	0.0624603	3.18014	0.0396446
2018	K + PCO	First_LeafArea	C07_28112333	C07	28112333	0.117143	0.000469551	-58.601	17.0007	0.0656417	3.32832	0.0550009
2018	K + PCO	First_LeafLength	C07_28112333	C07	28112333	0.117143	0.000393633	-2.15759	0.617995	0.0672808	3.40491	0.0416608
2018	K	First_LeafArea	C07_28112333	C07	28112333	0.117143	0.000380721	-55.9713	15.9728	0.0677618	3.41939	0.0501754
2018	K	Second_LeafWidth	C07_28112333	C07	28112333	0.117143	0.000302164	-1.80767	0.507561	0.0699161	3.51976	0.0437724
2018	K	Second_LeafLength	C07_28112333	C07	28112333	0.117143	0.000185386	-2.45524	0.667267	0.0744492	3.73192	0.0428969
2018	K	Second_LeafArea	C07_28112333	C07	28112333	0.117143	2.41168e-05	-76.1295	18.416	0.093035	4.61768	0.0639121
2018	K + PCO	Second_LeafLength	C07_28112333	C07	28112333	0.117143	2.08024e-05	-2.95293	0.710491	0.0939928	4.68189	0.0620504
2018	K + PCO	Second_LeafArea	C07_28112333	C07	28112333	0.117143	1.35039e-05	-82.3718	19.4082	0.0978112	4.86954	0.0748227
2018	K	First_LeafWidth	C07_28112389	C07	28112389	0.117143	0.000976307	-1.47352	0.451994	0.0589233	3.01041	0.0498832
2018	K + PCO	Second_LeafWidth	C07_28112389	C07	28112389	0.117143	0.000660479	-1.72032	0.512064	0.0624603	3.18014	0.0492567
2018	K + PCO	First_LeafArea	C07_28112389	C07	28112389	0.117143	0.000469551	-58.601	17.0007	0.0656417	3.32832	0.0683363
2018	K + PCO	First_LeafLength	C07_28112389	C07	28112389	0.117143	0.000393633	-2.15759	0.617995	0.0672808	3.40491	0.0517617
2018	K	First_LeafArea	C07_28112389	C07	28112389	0.117143	0.000380721	-55.9713	15.9728	0.0677618	3.41939	0.0623408
2018	K	Second_LeafWidth	C07_28112389	C07	28112389	0.117143	0.000302164	-1.80767	0.507561	0.0699161	3.51976	0.0543853
2018	K	Second_LeafLength	C07_28112389	C07	28112389	0.117143	0.000185386	-2.45524	0.667267	0.0744492	3.73192	0.0532975
2018	K	Second_LeafArea	C07_28112389	C07	28112389	0.117143	2.41168e-05	-76.1295	18.416	0.093035	4.61768	0.079408
2018	K + PCO	Second_LeafLength	C07_28112389	C07	28112389	0.117143	2.08024e-05	-2.95293	0.710491	0.0939928	4.68189	0.0770949
2018	K + PCO	Second_LeafArea	C07_28112389	C07	28112389	0.117143	1.35039e-05	-82.3718	19.4082	0.0978112	4.86954	0.092964
2017	K + PCO	LeafRatio	C07_28300583	C07	28300583	0.0225694	0.00028436	0.19749	0.0549297	0.0438909	3.54613	0.13518
2017	K	LeafRatio	C07_28300583	C07	28300583	0.0225694	0.000151518	0.206599	0.0550747	0.0476861	3.81954	0.147937
2017	K	HeadRatio	C07_28300605	C07	28300605	0.0203252	0.000958557	0.115001	0.035106	0.0426839	3.01838	0.238847
2017	K + PCO	LeafRatio	C07_28300605	C07	28300605	0.0243056	0.000438911	0.170483	0.0489142	0.0413021	3.35762	0.262273
2017	K	LeafRatio	C07_28300605	C07	28300605	0.0243056	0.000240149	0.178377	0.0490167	0.0449416	3.61952	0.287123
2019	K	Second_LeafRatio	C07_29490445	C07	29490445	0.104938	0.000397012	0.0667782	0.0190401	0.0493602	3.4012	0.00519199
2019	K	Second_LeafLength	C07_29512164	C07	29512164	0.0144033	0.000485283	7.22977	2.09208	0.0479577	3.314	0.49893
2019	K	First_LeafLength	C07_29512164	C07	29512164	0.0145228	0.00039153	6.74353	1.92097	0.0498493	3.40724	0.559934
2019	K + PCO	Second_LeafLength	C07_29512164	C07	29512164	0.0144033	0.000248689	7.55997	2.0874	0.0525479	3.60434	0.545545
2019	K + PCO	First_LeafLength	C07_29512164	C07	29512164	0.0145228	0.000156613	7.17335	1.92153	0.0561871	3.80517	0.633587
2019	K	First_LeafRatio	C07_29512164	C07	29512164	0.0145228	0.000122683	0.188384	0.0496542	0.057977	3.91122	0.512021
2019	K + PCO	First_LeafRatio	C07_29512164	C07	29512164	0.0145228	7.95477e-05	0.192815	0.0495541	0.0608883	4.09937	0.536388
2017	K + PCO	HeadRatio	C07_29512164	C07	29512164	0.0101626	9.06209e-06	0.21809	0.050036	0.0743204	5.04277	0.0854471
2017	K	HeadRatio	C07_29512164	C07	29512164	0.0101626	4.08638e-06	0.232358	0.0513819	0.079769	5.38866	0.0969936
2019	K + PCO	Head_Ratio	C07_29629280	C07	29629280	0.167442	0.000559438	0.0713099	0.0208994	0.0527094	3.25225	0.00485429
2019	K	Head_Ratio	C07_29629280	C07	29629280	0.167442	0.000325211	0.0732258	0.0206105	0.0570201	3.48783	0.00511863
2019	K + PCO	Head_Ratio	C07_29629357	C07	29629357	0.165116	0.000485561	0.0717301	0.0208002	0.0538114	3.31376	0.00491167
2019	K	Head_Ratio	C07_29629357	C07	29629357	0.165116	0.000305223	0.0734713	0.020588	0.0575134	3.51538	0.00515301
2019	K + PCO	First_LeafRatio	C07_29706300	C07	29706300	0.0311203	0.0007823	-0.134078	0.0402863	0.0449201	3.10663	0.258572
2019	K + PCO	Head_Height	C07_29991930	C07	29991930	0.0883721	0.000924373	1.67773	0.511586	0.0487921	3.03415	0.176737
2019	K	Head_Area	C07_30058075	C07	30058075	0.423256	0.000785969	22.0436	6.62908	0.0501305	3.10459	0.00404
2018	K + PCO	Second_LeafWidth	C07_30469357	C07	30469357	0.08	0.000688428	1.85083	0.552683	0.0620729	3.16214	0.0338009
2019	K + PCO	Second_LeafWidth	C07_31162979	C07	31162979	0.430041	0.000677462	1.65675	0.492114	0.0455711	3.16912	0.0335024
2018	K	First_LeafRatio	C07_31440517	C07	31440517	0.0514286	0.000314426	0.119719	0.0337078	0.0695457	3.50248	0.100381
2018	K	First_LeafRatio	C07_31440605	C07	31440605	0.0514286	0.000314426	0.119719	0.0337078	0.0695457	3.50248	0.089873
2019	K	Head_Weight	C07_32305995	C07	32305995	0.197674	0.000354769	-0.382172	0.108231	0.056343	3.45005	0.133332
2019	K + PCO	Head_Ratio	C07_32826347	C07	32826347	0.467442	0.000934672	0.0483648	0.0147612	0.0487055	3.02934	0.00389903
2019	K	Head_Ratio	C07_32826347	C07	32826347	0.467442	0.00065602	0.0502643	0.0149014	0.0515452	3.18308	0.00421131
2018	K	HeadRatio	C07_32826347	C07	32826347	0.43949	7.38999e-05	0.0547104	0.0140883	0.0915861	4.13136	0.10679
2018	K + PCO	HeadRatio	C07_32826347	C07	32826347	0.43949	6.77021e-05	0.0575965	0.0147903	0.0920734	4.1694	0.118354
2018	K + PCO	HeadRatio	C07_34078847	C07	34078847	0.324841	0.000347024	-0.0661194	0.0188074	0.0757035	3.45964	0.0293587
2018	K	HeadRatio	C07_34078847	C07	34078847	0.324841	8.21307e-05	-0.0661227	0.0171309	0.0905311	4.08549	0.0293617
2019	K + PCO	Leaf_Number	C07_34568204	C07	34568204	0.0744186	0.000863674	3.60359	1.09276	0.0493228	3.06365	0.0203904
2017	K	LeafLength	C07_35608927	C07	35608927	0.0868056	0.000556028	3.62323	1.05774	0.039923	3.2549	0.0680233
2019	K + PCO	Head_Height	C07_35608927	C07	35608927	0.0744186	0.000388917	-1.9157	0.546572	0.0555357	3.41014	0.0473172
2019	K	Head_Height	C07_35608927	C07	35608927	0.0744186	0.000311225	-1.85636	0.520893	0.057362	3.50693	0.0444314
2017	K	LeafWidth	C07_35608927	C07	35608927	0.0868056	0.000194122	3.16151	0.85647	0.0462104	3.71193	0.0847083
2017	K	LeafArea	C07_35608927	C07	35608927	0.0868056	8.1485e-05	163.284	41.8977	0.0513706	4.08892	0.0936677
2017	K + PCO	HeadRatio	C07_37348308	C07	37348308	0.0813008	0.000958964	0.0643688	0.0196608	0.0426368	3.0182	0.0391708
2017	K	HeadRatio	C07_37348308	C07	37348308	0.0813008	0.000713603	0.0670576	0.0199864	0.0447293	3.14654	0.0425116
2019	K + PCO	First_LeafLength	C07_37668756	C07	37668756	0.0788382	0.000961876	-3.18684	0.973822	0.0434642	3.01688	0.121825
2017	K	HeadRatio	C07_43778514	C07	43778514	0.0426829	0.000640187	0.107655	0.0318138	0.0454811	3.19369	0.0329299
2017	K	HeadRatio	C07_43778578	C07	43778578	0.0487805	0.00021118	0.106474	0.0290528	0.0531343	3.67535	0.174173
2019	K	Head_Ratio	C07_44239444	C07	44239444	0.0302326	0.000554315	0.135492	0.0396506	0.0528622	3.25624	0.228623
2019	K + PCO	Head_Ratio	C07_44239444	C07	44239444	0.0302326	0.000113595	0.148703	0.0391095	0.0650307	3.94464	0.275383
2017	K	LeafRatio	C07_44299813	C07	44299813	0.0555556	0.000157488	-0.15072	0.0402783	0.0474561	3.80275	0.0209961
2017	K + PCO	LeafRatio	C07_44299813	C07	44299813	0.0555556	7.51629e-05	-0.160828	0.0410965	0.0517877	4.124	0.0239068
2017	K + PCO	LeafRatio	C07_44299879	C07	44299879	0.0572917	0.000295049	-0.149758	0.0417607	0.043671	3.53011	0.0500466
2017	K	LeafRatio	C07_44485146	C07	44485146	0.0868056	0.000770739	0.118852	0.0355973	0.037967	3.11309	0.05299
2017	K + PCO	HeadRatio	C07_44485146	C07	44485146	0.0630081	0.00042359	0.0923686	0.0264748	0.0482779	3.37305	0.0613319
2017	K	HeadRatio	C07_44834114	C07	44834114	0.441057	0.000989462	0.0419234	0.0128317	0.0424638	3.0046	0.00973928
2019	K + PCO	Leaf_Number	C07_45518780	C07	45518780	0.0372093	0.000791738	5.53011	1.66524	0.0500018	3.10142	0.290904
2019	K	Leaf_Number	C07_45518780	C07	45518780	0.0372093	0.000385739	5.78981	1.64953	0.0556912	3.41371	0.318868
2017	K + PCO	LeafRatio	C07_46679856	C07	46679856	0.0625	0.00092918	-0.128537	0.0391054	0.0368186	3.0319	0.016193
2017	K	HeadArea	C07_48223770	C07	48223770	0.0223577	0.000473288	78.5115	22.6739	0.0475707	3.32487	0.676405
2017	K + PCO	HeadArea	C08_1058421	C08	1058421	0.180894	0.00068651	26.8442	7.98101	0.0449473	3.16335	0.0685985
2017	K + PCO	HeadHeight	C08_1058421	C08	1058421	0.180894	0.000194591	1.11239	0.302111	0.0536208	3.71088	0.0797817
2017	K	HeadWidth	C08_4156895	C08	4156895	0.0264228	0.000997428	2.98344	0.91377	0.0424082	3.00112	0.34461
2017	K	HeadArea	C08_4156895	C08	4156895	0.0264228	0.000497425	75.4444	21.8692	0.0472268	3.30327	0.449042
2017	K + PCO	HeadArea	C08_4156895	C08	4156895	0.0264228	0.000207141	78.5403	21.4186	0.0531927	3.68373	0.486651
2018	K	HeadRatio	C08_4579119	C08	4579119	0.0286624	0.000362435	0.151557	0.0431692	0.0755037	3.44077	0.189302
2018	K + PCO	HeadRatio	C08_4579119	C08	4579119	0.0286624	0.000344646	0.155487	0.0442065	0.0757733	3.46263	0.199246
2017	K + PCO	LeafRatio	C08_6444844	C08	6444844	0.0555556	0.000729695	-0.142604	0.0425419	0.0382645	3.13686	0.10368
2019	K + PCO	Second_LeafWidth	C08_6902595	C08	6902595	0.0246914	0.000651878	3.81401	1.12949	0.0458399	3.18583	0.357497
2019	K + PCO	Head_Height	C08_6902595	C08	6902595	0.0209302	0.000650379	2.54886	0.755703	0.051536	3.18683	0.413965
2019	K	Head_Height	C08_6902595	C08	6902595	0.0209302	0.000492785	2.5658	0.744241	0.0537812	3.30734	0.419487
2019	K + PCO	Second_LeafArea	C08_6902595	C08	6902595	0.0246914	0.000368308	194.858	55.2956	0.0498196	3.43379	0.421892
2019	K	First_LeafRatio	C08_7623960	C08	7623960	0.0705394	0.000654614	0.0854799	0.0253094	0.0462285	3.18401	0.118395
2019	K + PCO	First_LeafRatio	C08_7623960	C08	7623960	0.0705394	0.000481571	0.0862274	0.0249553	0.048332	3.31734	0.120475
2019	K	Second_LeafRatio	C08_7623960	C08	7623960	0.0699588	0.000278447	0.0892376	0.0248133	0.0518341	3.55526	0.137541
2019	K + PCO	Second_LeafRatio	C08_7623960	C08	7623960	0.0699588	0.000190306	0.0892116	0.0241972	0.0544021	3.72055	0.137461
2019	K + PCO	First_LeafLength	C08_12327090	C08	12327090	0.0228216	0.000949255	-5.63546	1.72018	0.0435573	3.02262	0.374696
2019	K + PCO	First_LeafLength	C08_12327145	C08	12327145	0.0228216	0.000949255	-5.63546	1.72018	0.0435573	3.02262	0.374696
2018	K	First_LeafRatio	C08_14922823	C08	14922823	0.0514286	0.000578648	-0.106081	0.0312202	0.0638441	3.23759	0.0127944
2018	K + PCO	Second_LeafRatio	C08_14922823	C08	14922823	0.0514286	4.83817e-05	-0.133603	0.0335867	0.0864518	4.31532	0.0170143
2018	K + PCO	First_LeafRatio	C08_14922823	C08	14922823	0.0514286	2.70057e-05	-0.124044	0.0302401	0.0916726	4.56854	0.0174944
2018	K	First_LeafRatio	C08_14922824	C08	14922824	0.0514286	0.000578648	-0.106081	0.0312202	0.0638441	3.23759	0.0139886
2018	K + PCO	Second_LeafRatio	C08_14922824	C08	14922824	0.0514286	4.83817e-05	-0.133603	0.0335867	0.0864518	4.31532	0.0186023
2018	K + PCO	First_LeafRatio	C08_14922824	C08	14922824	0.0514286	2.70057e-05	-0.124044	0.0302401	0.0916726	4.56854	0.0191272
2018	K	First_LeafRatio	C08_14922885	C08	14922885	0.0457143	0.000916852	-0.106036	0.0323586	0.0595158	3.0377	0.117112
2018	K + PCO	Second_LeafRatio	C08_14922885	C08	14922885	0.0457143	0.000123741	-0.130061	0.0345144	0.0779386	3.90749	0.147715
2018	K + PCO	First_LeafRatio	C08_14922885	C08	14922885	0.0457143	9.88642e-05	-0.118693	0.0310753	0.0799848	4.00496	0.14674
2017	K + PCO	LeafLength	C08_16885744	C08	16885744	0.383681	0.000325727	2.05597	0.577314	0.0430814	3.48715	0.0371456
2017	K	LeafLength	C08_16885744	C08	16885744	0.383681	0.000268928	2.04514	0.566363	0.0442661	3.57036	0.0367555
2017	K + PCO	LeafLength	C08_17244156	C08	17244156	0.210069	0.000739956	-2.83216	0.845834	0.0381809	3.13079	0.0709989
2017	K + PCO	HeadHeight	C08_17892664	C08	17892664	0.302846	0.000972603	0.787186	0.240721	0.0425391	3.01206	0.0197159
2018	K	HeadHeight	C08_18165508	C08	18165508	0.468153	0.000906818	1.63092	0.497922	0.0660526	3.04248	0.075413
2018	K + PCO	HeadArea	C08_18165508	C08	18165508	0.468153	0.000308286	55.9184	15.7761	0.0769045	3.51105	0.0924773
2018	K	HeadArea	C08_18165508	C08	18165508	0.468153	0.000112771	58.0132	15.3141	0.0873521	3.9478	0.0995361
2018	K	Second_LeafLength	C08_18461615	C08	18461615	0.0228571	7.45671e-05	5.86124	1.50691	0.0828189	4.12745	0.212442
2018	K + PCO	Second_LeafLength	C08_18461615	C08	18461615	0.0228571	5.642e-05	6.05544	1.5352	0.0850672	4.24857	0.226753
2017	K + PCO	HeadRatio	C08_19128253	C08	19128253	0.0792683	9.74052e-05	0.0794234	0.0206528	0.0583462	4.01142	0.0413231
2017	K	HeadRatio	C08_19128253	C08	19128253	0.0792683	7.02947e-05	0.0821612	0.0209399	0.0606636	4.15308	0.0442211
2018	K + PCO	First_LeafArea	C08_19268251	C08	19268251	0.351429	0.000578796	-38.6456	11.3875	0.0636928	3.23747	0.031647
2018	K	Second_LeafArea	C08_19503458	C08	19503458	0.0314286	0.0006168	116.516	34.4588	0.0632449	3.20986	0.195308
2018	K	Second_LeafWidth	C08_19776112	C08	19776112	0.285714	0.000881707	1.16922	0.355674	0.0598842	3.05468	0.0383032
2018	K + PCO	HeadRatio	C08_19776112	C08	19776112	0.296178	0.000869254	0.0541989	0.0165134	0.0663127	3.06085	0.050205
2018	K	HeadRatio	C08_19776112	C08	19776112	0.296178	0.000526927	0.0533891	0.0156256	0.0716614	3.27825	0.048716
2018	K	Second_LeafWidth	C08_19776145	C08	19776145	0.285714	0.000881707	1.16922	0.355674	0.0598842	3.05468	0.0412026
2018	K + PCO	HeadRatio	C08_19776145	C08	19776145	0.296178	0.000869254	0.0541989	0.0165134	0.0663127	3.06085	0.0547436
2018	K	HeadRatio	C08_19776145	C08	19776145	0.296178	0.000526927	0.0533891	0.0156256	0.0716614	3.27825	0.0531199
2018	K	First_LeafArea	C08_19915921	C08	19915921	0.137143	0.000913105	-50.8765	15.5206	0.0595544	3.03948	0.0855476
2018	K	First_LeafArea	C08_19915927	C08	19915927	0.137143	0.000913105	-50.8765	15.5206	0.0595544	3.03948	0.0855476
2017	K	LeafRatio	C08_20073481	C08	20073481	0.208333	0.000785046	0.0758258	0.0227443	0.0378568	3.10511	0.0229295
2017	K	LeafRatio	C08_20073501	C08	20073501	0.210069	0.000798548	0.0757273	0.0227461	0.0377546	3.0977	0.0540759
2017	K	LeafRatio	C08_20073574	C08	20073574	0.211806	0.000878224	0.0745527	0.0225676	0.0371845	3.05639	0.0118653
2019	K + PCO	Leaf_Number	C08_22323594	C08	22323594	0.144186	0.000263035	3.09465	0.859115	0.0585656	3.57999	0.0255259
2019	K	Leaf_Number	C08_22323594	C08	22323594	0.144186	6.3773e-05	3.38231	0.858857	0.0695948	4.19536	0.0304919
2018	K + PCO	HeadHeight	C08_23578570	C08	23578570	0.0382166	0.000787238	4.30473	1.30125	0.0673322	3.10389	0.195621
2018	K	HeadArea	C08_23578570	C08	23578570	0.0382166	0.000636183	134.093	39.8091	0.0697192	3.19642	0.198008
2018	K + PCO	HeadArea	C08_23578570	C08	23578570	0.0382166	0.000135434	148.895	39.8248	0.0851853	3.86827	0.244135
2018	K	HeadArea	C08_23578650	C08	23578650	0.0350318	0.000988282	135.969	41.8046	0.0651603	3.00512	0.334035
2018	K + PCO	HeadArea	C08_23578650	C08	23578650	0.0350318	0.000321683	147.855	41.8362	0.0764731	3.49257	0.394989
2018	K	HeadArea	C08_23578659	C08	23578659	0.0414013	0.000918403	120.987	36.9756	0.065921	3.03697	0.43995
2018	K + PCO	HeadArea	C08_23578659	C08	23578659	0.0414013	0.000227075	133.835	36.991	0.079996	3.64383	0.538351
2017	K	HeadHeight	C08_26011230	C08	26011230	0.046748	0.000621218	1.77382	0.52297	0.0456894	3.20676	0.0836161
2017	K + PCO	HeadHeight	C08_26011230	C08	26011230	0.046748	5.19132e-05	2.02597	0.507966	0.0626176	4.28472	0.109078
2017	K + PCO	HeadHeight	C08_26011303	C08	26011303	0.0630081	0.000196593	1.62722	0.44223	0.0535507	3.70643	0.103051
2017	K	HeadHeight	C08_26011303	C08	26011303	0.0630081	0.000185818	1.68837	0.456824	0.0540135	3.73091	0.110941
2017	K	LeafRatio	C08_26700009	C08	26700009	0.0729167	0.000763882	-0.129274	0.038691	0.0380206	3.11697	0.0322167
2017	K + PCO	LeafRatio	C08_26700009	C08	26700009	0.0729167	0.000274032	-0.147596	0.0409472	0.0441113	3.5622	0.0419964
2017	K	LeafRatio	C08_26700041	C08	26700041	0.0729167	0.000763882	-0.129274	0.038691	0.0380206	3.11697	0.0542598
2017	K + PCO	LeafRatio	C08_26700041	C08	26700041	0.0729167	0.000274032	-0.147596	0.0409472	0.0441113	3.5622	0.0707308
2017	K	LeafRatio	C08_26700105	C08	26700105	0.0920139	0.000928448	-0.121229	0.0368656	0.0368512	3.03224	0.0466813
2017	K + PCO	LeafRatio	C08_26700105	C08	26700105	0.0920139	0.00036881	-0.141543	0.0400989	0.0423405	3.4332	0.0636362
2018	K + PCO	First_LeafRatio	C08_26721040	C08	26721040	0.0542857	0.000853849	-0.0842283	0.0255838	0.0600574	3.06862	0.0151543
2018	K + PCO	HeadRatio	C08_28506487	C08	28506487	0.143312	4.73554e-06	0.100743	0.0227245	0.117663	5.32463	0.320522
2018	K	HeadRatio	C08_28506487	C08	28506487	0.143312	2.1885e-06	0.0955566	0.0208162	0.125603	5.65985	0.288371
2019	K	Second_LeafWidth	C08_29133934	C08	29133934	0.0288066	0.000896152	4.023	1.22141	0.0436629	3.04762	0.0638051
2018	K	First_LeafRatio	C08_29559090	C08	29559090	0.08	0.000966406	0.0891536	0.0273244	0.0590195	3.01484	0.0974894
2018	K + PCO	First_LeafRatio	C08_29559090	C08	29559090	0.08	0.000953239	0.0842509	0.0258206	0.0590249	3.0208	0.0870619
2018	K	Second_LeafRatio	C08_29559090	C08	29559090	0.08	0.000386329	0.106586	0.0304487	0.0676253	3.41304	0.11682
2018	K + PCO	Second_LeafRatio	C08_29559090	C08	29559090	0.08	0.000382544	0.100327	0.0286781	0.0675461	3.41732	0.103503
2018	K	First_LeafRatio	C08_29559121	C08	29559121	0.08	0.000966406	0.0891536	0.0273244	0.0590195	3.01484	0.0837971
2018	K + PCO	First_LeafRatio	C08_29559121	C08	29559121	0.08	0.000953239	0.0842509	0.0258206	0.0590249	3.0208	0.0748341
2018	K	Second_LeafRatio	C08_29559121	C08	29559121	0.08	0.000386329	0.106586	0.0304487	0.0676253	3.41304	0.100413
2018	K + PCO	Second_LeafRatio	C08_29559121	C08	29559121	0.08	0.000382544	0.100327	0.0286781	0.0675461	3.41732	0.0889664
2019	K + PCO	First_LeafLength	C08_29934327	C08	29934327	0.26556	0.000977722	2.10757	0.644898	0.043349	3.00978	0.0467068
2019	K + PCO	First_LeafLength	C08_29979328	C08	29979328	0.155602	0.00091182	-2.48225	0.755177	0.0438408	3.04009	0.0168974
2019	K	Head_Area	C08_30474371	C08	30474371	0.0790698	0.000884068	-35.7532	10.8547	0.0492089	3.05351	0.0482982
2019	K + PCO	Head_Area	C08_30474371	C08	30474371	0.0790698	0.000813295	-37.5998	11.3466	0.0497921	3.08975	0.0534163
2019	K + PCO	Leaf_Number	C08_31494499	C08	31494499	0.0255814	0.000927379	-6.52377	1.98981	0.0487668	3.03274	0.248972
2019	K + PCO	Head_Height	C08_31783951	C08	31783951	0.172093	0.0005577	-1.94923	0.571141	0.0527336	3.2536	0.197461
2019	K	Head_Diameter	C08_31783951	C08	31783951	0.172093	0.000348306	-1.84461	0.521714	0.0564862	3.45804	0.12298
2019	K	Head_Area	C08_31783951	C08	31783951	0.172093	0.000307764	-44.7037	12.534	0.057449	3.51178	0.160775
2019	K	Head_Height	C08_31783951	C08	31783951	0.172093	5.18563e-05	-2.01991	0.506966	0.0711758	4.2852	0.212041
2018	K + PCO	First_LeafWidth	C08_34935108	C08	34935108	0.294286	0.00090942	-1.01217	0.309013	0.0594663	3.04124	0.0755738
2018	K + PCO	HeadWidth	C08_34935108	C08	34935108	0.302548	0.000809131	-2.30669	0.698792	0.0670502	3.09198	0.0977914
2018	K + PCO	First_LeafArea	C08_34935108	C08	34935108	0.294286	0.000802245	-37.8706	11.4457	0.0606413	3.09569	0.091636
2018	K + PCO	HeadArea	C08_34935119	C08	34935119	0.359873	0.00053446	-51.9826	15.2536	0.0713028	3.27208	0.0845354
2018	K + PCO	HeadWidth	C08_34935119	C08	34935119	0.359873	0.000277984	-2.34939	0.658172	0.0779524	3.55598	0.101445
2018	K	Second_LeafRatio	C08_35201850	C08	35201850	0.0971429	0.000933068	0.0945032	0.0288806	0.0593505	3.03009	0.115052
2018	K	Second_LeafRatio	C08_35201884	C08	35201884	0.0971429	0.000933068	0.0945032	0.0288806	0.0593505	3.03009	0.0744279
2019	K + PCO	Leaf_Number	C08_35727343	C08	35727343	0.313953	0.000545843	-2.30821	0.675227	0.0529009	3.26293	0.0415581
2019	K + PCO	Leaf_Number	C08_35727375	C08	35727375	0.186047	0.000460161	-2.6208	0.756961	0.0542291	3.33709	0.0578996
2019	K + PCO	Leaf_Number	C08_35727398	C08	35727398	0.2	0.00094875	-2.35701	0.72026	0.0485887	3.02285	0.0523284
2019	K	Second_LeafWidth	C08_36095123	C08	36095123	0.146091	0.000966181	-1.61487	0.493341	0.0431353	3.01494	0.0216285
2019	K	First_LeafWidth	C08_36095123	C08	36095123	0.147303	0.00091994	-1.50463	0.457834	0.0438261	3.03624	0.0204976
2019	K + PCO	First_LeafWidth	C08_36095123	C08	36095123	0.147303	0.000697942	-1.56871	0.467093	0.0457233	3.15618	0.0222807
2019	K + PCO	Second_LeafWidth	C08_36095123	C08	36095123	0.146091	0.000519819	-1.73793	0.505822	0.0474196	3.28415	0.0250507
2019	K	Second_LeafArea	C08_36095123	C08	36095123	0.146091	0.000465945	-82.4786	23.7947	0.0482419	3.33167	0.0255089
2019	K + PCO	First_LeafLength	C08_36095123	C08	36095123	0.147303	0.000288484	-2.13713	0.596177	0.0519238	3.53988	0.0186853
2019	K + PCO	Second_LeafArea	C08_36095123	C08	36095123	0.146091	0.000128323	-92.2757	24.407	0.0571254	3.89169	0.0319289
2019	K	First_LeafArea	C08_36095123	C08	36095123	0.147303	7.98351e-05	-76.248	19.583	0.0609665	4.09781	0.030418
2019	K + PCO	First_LeafArea	C08_36095123	C08	36095123	0.147303	3.93213e-05	-81.2363	20.0663	0.0657451	4.40537	0.0345283
2019	K	Second_LeafWidth	C08_36095125	C08	36095125	0.41358	0.000908056	1.21542	0.369411	0.0435704	3.04189	0.0244609
2019	K	Second_LeafWidth	C08_36095130	C08	36095130	0.146091	0.000966181	-1.61487	0.493341	0.0431353	3.01494	0.04988
2019	K	First_LeafWidth	C08_36095130	C08	36095130	0.147303	0.00091994	-1.50463	0.457834	0.0438261	3.03624	0.0471296
2019	K + PCO	First_LeafWidth	C08_36095130	C08	36095130	0.147303	0.000697942	-1.56871	0.467093	0.0457233	3.15618	0.0512293
2019	K + PCO	Second_LeafWidth	C08_36095130	C08	36095130	0.146091	0.000519819	-1.73793	0.505822	0.0474196	3.28415	0.0577723
2019	K	Second_LeafArea	C08_36095130	C08	36095130	0.146091	0.000465945	-82.4786	23.7947	0.0482419	3.33167	0.0588289
2019	K + PCO	First_LeafLength	C08_36095130	C08	36095130	0.147303	0.000288484	-2.13713	0.596177	0.0519238	3.53988	0.0429626
2019	K + PCO	Second_LeafArea	C08_36095130	C08	36095130	0.146091	0.000128323	-92.2757	24.407	0.0571254	3.89169	0.0736348
2019	K	First_LeafArea	C08_36095130	C08	36095130	0.147303	7.98351e-05	-76.248	19.583	0.0609665	4.09781	0.0699392
2019	K + PCO	First_LeafArea	C08_36095130	C08	36095130	0.147303	3.93213e-05	-81.2363	20.0663	0.0657451	4.40537	0.0793899
2017	K + PCO	LeafWidth	C08_36511908	C08	36511908	0.175347	0.000569327	1.86627	0.546048	0.0397481	3.24464	0.048887
2017	K	HeadHeight	C08_37026705	C08	37026705	0.256098	0.000331796	0.925505	0.260482	0.0500231	3.47913	0.0357868
2017	K + PCO	HeadHeight	C08_37026705	C08	37026705	0.256098	0.000107028	0.982854	0.257036	0.0577046	3.9705	0.0403593
2017	K + PCO	LeafRatio	C08_37449643	C08	37449643	0.0607639	0.000599163	-0.13994	0.041106	0.0394428	3.22245	0.180313
2017	K + PCO	LeafRatio	C08_37449648	C08	37449648	0.0607639	0.000599163	-0.13994	0.041106	0.0394428	3.22245	0.121918
2017	K + PCO	LeafRatio	C08_37449652	C08	37449652	0.0625	0.000814652	-0.135759	0.04086	0.0376057	3.08903	0.17061
2017	K + PCO	LeafRatio	C08_37449708	C08	37449708	0.0625	0.000814652	-0.135759	0.04086	0.0376057	3.08903	0.175314
2019	K + PCO	First_LeafWidth	C08_39016221	C08	39016221	0.0477178	0.000883515	-3.27449	0.993627	0.044063	3.05379	0.185276
2019	K	First_LeafWidth	C08_39016221	C08	39016221	0.0477178	0.000517541	-3.33733	0.970477	0.047885	3.28606	0.192456
2019	K + PCO	Head_Area	C09_256010	C09	256010	0.0325581	0.000829441	58.018	17.536	0.0496386	3.08121	0.0856041
2019	K	Head_Area	C09_256010	C09	256010	0.0325581	0.000817599	56.3594	17.0025	0.0498214	3.08746	0.0807795
2019	K	Head_Ratio	C09_625237	C09	625237	0.044186	0.000989104	0.137224	0.0420487	0.0483287	3.00476	0.158149
2019	K	Head_Height	C09_625237	C09	625237	0.044186	0.000901778	2.36857	0.720267	0.0490534	3.0449	0.244017
2017	K	HeadRatio	C09_625237	C09	625237	0.0447154	0.000744384	0.108767	0.0325269	0.0444368	3.1282	0.07847
2018	K + PCO	Second_LeafRatio	C09_625320	C09	625320	0.222857	0.000563412	0.0781686	0.0229868	0.0639441	3.24917	0.0381228
2018	K	Second_LeafRatio	C09_625320	C09	625320	0.222857	0.000245204	0.0826068	0.0228672	0.0718579	3.61047	0.0425748
2018	K	First_LeafArea	C09_899987	C09	899987	0.137143	0.000321439	61.4621	17.3316	0.0693403	3.4929	0.14448
2019	K + PCO	First_LeafRatio	C09_1192434	C09	1192434	0.294606	0.000759367	0.0431092	0.0129222	0.0451296	3.11955	0.0194033
2019	K + PCO	First_LeafRatio	C09_1192437	C09	1192437	0.294606	0.000759367	0.0431092	0.0129222	0.0451296	3.11955	0.0194177
2019	K + PCO	First_LeafRatio	C09_1192549	C09	1192549	0.153527	0.000758502	-0.0568733	0.0170465	0.0451376	3.12004	0.0481341
2018	K + PCO	Second_LeafRatio	C09_1192549	C09	1192549	0.122857	0.000234512	-0.0815529	0.0225406	0.0720723	3.62983	0.036247
2019	K + PCO	First_LeafRatio	C09_1192591	C09	1192591	0.153527	0.000758502	-0.0568733	0.0170465	0.0451376	3.12004	0.0486706
2018	K + PCO	Second_LeafRatio	C09_1192591	C09	1192591	0.122857	0.000234512	-0.0815529	0.0225406	0.0720723	3.62983	0.0785723
2017	K + PCO	HeadArea	C09_1595043	C09	1595043	0.0121951	3.00264e-05	91.9996	22.3932	0.066312	4.5225	0.131988
2017	K	HeadArea	C09_1595043	C09	1595043	0.0121951	6.62616e-06	102.793	23.2215	0.0765642	5.17874	0.164773
2019	K	First_LeafLength	C09_1625904	C09	1625904	0.491701	0.00082665	1.62325	0.489629	0.0445815	3.08268	0.021509
2019	K + PCO	Second_LeafWidth	C09_1625904	C09	1625904	0.49177	0.000607179	1.4035	0.413351	0.0463358	3.21668	0.0335587
2019	K	Second_LeafLength	C09_1625904	C09	1625904	0.49177	0.000484381	1.82779	0.528834	0.0479707	3.31481	0.021786
2019	K + PCO	Second_LeafArea	C09_1625904	C09	1625904	0.49177	0.000441575	68.9748	19.8327	0.0485565	3.355	0.0366453
2019	K + PCO	First_LeafLength	C09_1625904	C09	1625904	0.491701	0.000436688	1.72147	0.494625	0.0490188	3.35983	0.0241907
2019	K	Second_LeafArea	C09_1625904	C09	1625904	0.49177	0.000270461	69.2812	19.2256	0.0520367	3.5679	0.0369716
2019	K	Second_LeafWidth	C09_1625904	C09	1625904	0.49177	0.000267062	1.44652	0.401062	0.0521248	3.57339	0.0356475
2019	K + PCO	Second_LeafLength	C09_1625904	C09	1625904	0.49177	0.000259823	1.92258	0.532432	0.052244	3.58532	0.0241044
2019	K	Second_LeafWidth	C09_1625940	C09	1625940	0.465021	0.000565013	-1.40922	0.4125	0.0468939	3.24794	0.0537962
2019	K	Second_LeafArea	C09_1625940	C09	1625940	0.465021	0.00038777	-69.4591	19.7708	0.0495247	3.41143	0.0590891
2019	K	Second_LeafWidth	C09_1625943	C09	1625943	0.465021	0.000565013	-1.40922	0.4125	0.0468939	3.24794	0.0106358
2019	K	Second_LeafArea	C09_1625943	C09	1625943	0.465021	0.00038777	-69.4591	19.7708	0.0495247	3.41143	0.0116822
2018	K	Second_LeafRatio	C09_1925945	C09	1925945	0.0371429	0.000994372	-0.159673	0.0490531	0.0587504	3.00245	0.0243021
2018	K + PCO	Second_LeafRatio	C09_1925945	C09	1925945	0.0371429	0.000274127	-0.167809	0.0468697	0.0706319	3.56205	0.0268419
2018	K	Second_LeafRatio	C09_1926007	C09	1926007	0.0371429	0.000994372	-0.159673	0.0490531	0.0587504	3.00245	0.0271594
2018	K + PCO	Second_LeafRatio	C09_1926007	C09	1926007	0.0371429	0.000274127	-0.167809	0.0468697	0.0706319	3.56205	0.0299979
2019	K + PCO	Head_Width	C09_3520523	C09	3520523	0.323256	0.000973255	1.29404	0.39627	0.0483894	3.01177	0.0609678
2019	K	Head_Area	C09_3520523	C09	3520523	0.323256	0.000928067	25.2421	7.6941	0.0488282	3.03242	0.072652
2019	K	Head_Width	C09_3520523	C09	3520523	0.323256	0.000544447	1.29984	0.37987	0.0530026	3.26404	0.0615151
2018	K + PCO	HeadRatio	C09_4201021	C09	4201021	0.133758	0.000952924	0.0739505	0.0226996	0.065366	3.02094	0.146628
2018	K	First_LeafLength	C09_5403315	C09	5403315	0.102857	0.000779134	-2.1461	0.646381	0.0610488	3.10839	0.0537725
2018	K + PCO	Second_LeafLength	C09_5403315	C09	5403315	0.102857	0.000431965	-2.71977	0.784245	0.0664176	3.36455	0.0686705
2018	K	Second_LeafLength	C09_5403315	C09	5403315	0.102857	3.75516e-05	-2.99408	0.74111	0.0890489	4.42537	0.0832212
2019	K	First_LeafRatio	C09_5526435	C09	5526435	0.120332	0.000967069	0.0551244	0.0168429	0.043473	3.01454	0.0225531
2019	K	First_LeafWidth	C09_5526435	C09	5526435	0.120332	0.000941502	-1.6882	0.514674	0.0436624	3.02618	0.0399517
2019	K + PCO	First_LeafRatio	C09_5526435	C09	5526435	0.120332	0.000547253	0.0585038	0.0170953	0.0474338	3.26181	0.0254032
2019	K + PCO	First_LeafWidth	C09_5526435	C09	5526435	0.120332	0.000430616	-1.84451	0.529434	0.049117	3.36591	0.0476925
2017	K + PCO	LeafLength	C09_9061145	C09	9061145	0.0277778	0.000839871	-6.49198	1.95876	0.0374233	3.07579	0.35925
2017	K	LeafArea	C09_9061145	C09	9061145	0.0277778	0.000659416	-246.508	72.9216	0.0389017	3.18084	0.351186
2017	K	LeafWidth	C09_9061145	C09	9061145	0.0277778	0.000582028	-5.07449	1.48662	0.0396493	3.23506	0.359003
2017	K	LeafLength	C09_9061145	C09	9061145	0.0277778	0.000424139	-6.44124	1.8426	0.0415434	3.37249	0.353657
2018	K + PCO	First_LeafLength	C09_9064926	C09	9064926	0.0914286	0.000943047	-1.86522	0.571134	0.0591257	3.02547	0.104038
2017	K	HeadRatio	C09_12982674	C09	12982674	0.0264228	5.04029e-05	0.159411	0.0398673	0.0629262	4.29754	0.469871
2017	K	HeadRatio	C09_13006104	C09	13006104	0.0284553	0.000113262	0.145489	0.0381499	0.0574072	3.94592	0.247117
2019	K + PCO	Head_Width	C09_13829973	C09	13829973	0.0418605	0.000575347	2.28289	0.670495	0.0524911	3.24007	0.172865
2019	K	Head_Width	C09_13829973	C09	13829973	0.0418605	0.000546446	2.26447	0.661964	0.0529739	3.26245	0.170087
2019	K + PCO	Head_Width	C09_13830032	C09	13830032	0.0418605	0.000575347	2.28289	0.670495	0.0524911	3.24007	0.0746428
2019	K	Head_Width	C09_13830032	C09	13830032	0.0418605	0.000546446	2.26447	0.661964	0.0529739	3.26245	0.0734433
2018	K + PCO	First_LeafRatio	C09_15529132	C09	15529132	0.311429	0.000715449	-0.130347	0.0390404	0.0617129	3.14542	0.0754661
2019	K	Head_Diameter	C09_16283230	C09	16283230	0.172093	0.000867366	1.69915	0.515062	0.0493584	3.0618	0.01699
2019	K + PCO	Head_Width	C09_16283230	C09	16283230	0.172093	0.000847908	2.3504	0.711674	0.0494667	3.07165	0.0231061
2019	K + PCO	Head_Diameter	C09_16283230	C09	16283230	0.172093	0.000409292	2.06184	0.590441	0.0551393	3.38797	0.0250173
2018	K + PCO	HeadRatio	C09_16567611	C09	16567611	0.340764	0.000470991	0.136651	0.0397267	0.072594	3.32699	0.338788
2019	K	Head_Ratio	C09_17272359	C09	17272359	0.0232558	0.000536253	0.157553	0.0459912	0.053121	3.27063	0.0875817
2019	K	Head_Weight	C09_17562384	C09	17562384	0.0860465	0.000857643	0.378429	0.114608	0.0494468	3.06669	0.127246
2019	K	Head_Height	C09_17863843	C09	17863843	0.0395349	0.000687879	2.01281	0.598934	0.0511741	3.16249	0.0381911
2019	K + PCO	Head_Height	C09_17863843	C09	17863843	0.0395349	0.000635972	2.04652	0.605714	0.0517106	3.19656	0.0394812
2018	K	First_LeafRatio	C09_21907364	C09	21907364	0.122857	0.000269802	0.091429	0.0254732	0.0709698	3.56895	0.130431
2019	K + PCO	Head_Ratio	C09_21907377	C09	21907377	0.027907	0.000386262	0.228695	0.0652174	0.0555889	3.41312	0.45866
2019	K	Head_Ratio	C09_21907377	C09	21907377	0.027907	0.000346985	0.226143	0.063943	0.0565158	3.45969	0.448479
2018	K	First_LeafRatio	C09_21978318	C09	21978318	0.0428571	0.000703236	0.141031	0.0421349	0.0620128	3.1529	0.219094
2018	K	First_LeafRatio	C09_22142775	C09	22142775	0.0571429	0.000141063	0.134507	0.0359271	0.0769717	3.85059	0.0578949
2018	K	Second_LeafWidth	C09_22142775	C09	22142775	0.0571429	0.000122043	-2.76387	0.731664	0.0783048	3.91349	0.0843481
2018	K	Second_LeafRatio	C09_22142775	C09	22142775	0.0571429	9.21579e-05	0.153808	0.0400349	0.0808823	4.03547	0.0634665
2018	K	Second_LeafLength	C09_22144045	C09	22144045	0.0371429	0.000656593	4.0376	1.19986	0.0626578	3.1827	0.447967
2018	K + PCO	Second_LeafLength	C09_22144045	C09	22144045	0.0371429	0.000165881	4.84101	1.3083	0.0752562	3.7802	0.643978
2017	K	LeafRatio	C09_22144045	C09	22144045	0.0295139	0.000109135	0.208859	0.0545444	0.0496369	3.96203	0.269956
2018	K	Second_LeafRatio	C09_22144045	C09	22144045	0.0371429	9.19997e-05	0.191929	0.0499527	0.080898	4.03621	0.462976
2018	K + PCO	HeadRatio	C09_25065190	C09	25065190	0.0541401	0.00049463	0.100154	0.0292209	0.0720941	3.30572	0.318396
2018	K + PCO	HeadHeight	C09_25065190	C09	25065190	0.0541401	0.000464459	3.04148	0.883307	0.0727365	3.33305	0.265923
2018	K	HeadHeight	C09_25065190	C09	25065190	0.0541401	0.00035439	3.0642	0.871422	0.0757335	3.45052	0.26991
2019	K	First_LeafWidth	C09_25768455	C09	25768455	0.406639	0.000516215	1.33792	0.388984	0.0479031	3.28717	0.0398271
2017	K + PCO	HeadWidth	C09_27108729	C09	27108729	0.050813	0.000685838	-1.86618	0.554787	0.0449541	3.16378	0.0402694
2017	K	HeadWidth	C09_27108729	C09	27108729	0.050813	0.000195837	-2.02114	0.548749	0.0536528	3.7081	0.0472348
2018	K	Second_LeafArea	C09_27621549	C09	27621549	0.04	0.000875827	130.36	39.6337	0.0599472	3.05758	0.249001
2019	K + PCO	First_LeafWidth	C09_27621549	C09	27621549	0.0373444	0.000825447	4.05154	1.22264	0.044542	3.08331	0.0503896
2018	K + PCO	First_LeafArea	C09_27621549	C09	27621549	0.04	0.000369641	130.509	37.2147	0.0678644	3.43222	0.362471
2018	K	HeadArea	C09_27621549	C09	27621549	0.044586	0.000301145	170.999	48.083	0.0773981	3.52122	0.290308
2018	K	First_LeafWidth	C09_27621549	C09	27621549	0.04	0.000210471	3.51513	0.963243	0.0732745	3.67681	0.303582
2018	K	HeadHeight	C09_27621549	C09	27621549	0.044586	9.33641e-05	5.98936	1.56337	0.0892478	4.02982	0.341417
2018	K	First_LeafArea	C09_27621549	C09	27621549	0.04	7.19995e-05	132.139	33.9042	0.0831387	4.14267	0.371582
2018	K	First_LeafLength	C09_28857734	C09	28857734	0.0314286	0.000160032	4.36402	1.17492	0.0758081	3.79579	0.14672
2018	K + PCO	First_LeafLength	C09_28857734	C09	28857734	0.0314286	0.000116521	4.5227	1.19582	0.0784874	3.9336	0.157584
2017	K + PCO	LeafLength	C09_31279114	C09	31279114	0.0381944	0.000705512	-5.06973	1.50836	0.038466	3.1515	0.0865832
2018	K	Second_LeafRatio	C09_31390695	C09	31390695	0.191429	0.000966559	0.0886897	0.0271826	0.059018	3.01477	0.0244742
2018	K	HeadHeight	C09_32808755	C09	32808755	0.066879	0.000351195	4.53415	1.28864	0.0758262	3.45445	0.106662
2019	K + PCO	Second_LeafRatio	C09_32941225	C09	32941225	0.026749	0.000840833	-0.117657	0.0355559	0.0440614	3.07529	0.224992
2017	K + PCO	LeafArea	C09_35057133	C09	35057133	0.0451389	0.000504809	-162.461	47.1016	0.0404667	3.29687	0.0974912
2017	K + PCO	LeafWidth	C09_35057133	C09	35057133	0.0451389	0.000489079	-3.39699	0.982531	0.0406558	3.31062	0.102823
2017	K	LeafArea	C09_35057133	C09	35057133	0.0451389	0.000217015	-171.023	46.6758	0.0455458	3.66351	0.108037
2017	K	LeafWidth	C09_35057133	C09	35057133	0.0451389	0.000149369	-3.66858	0.977072	0.0477711	3.82574	0.119922
2017	K	LeafLength	C09_35057133	C09	35057133	0.0451389	0.000108903	-4.45694	1.1638	0.0496496	3.96296	0.108219
2017	K + PCO	LeafLength	C09_35057133	C09	35057133	0.0451389	9.26974e-05	-4.52785	1.17149	0.0505478	4.03293	0.11169
2019	K + PCO	Head_Width	C09_35792777	C09	35792777	0.0325581	0.000262457	3.31806	0.920998	0.0585826	3.58094	0.293039
2019	K	Head_Width	C09_35792777	C09	35792777	0.0325581	0.000214808	3.3325	0.911792	0.0602406	3.66795	0.295596
2017	K + PCO	LeafWidth	C09_38033372	C09	38033372	0.199653	0.00035272	1.96557	0.555065	0.0426066	3.45257	0.0328128
2017	K	LeafWidth	C09_38033372	C09	38033372	0.199653	0.000156046	2.08103	0.555805	0.0475109	3.80675	0.0367809
2018	K	Second_LeafRatio	C09_38266719	C09	38266719	0.0514286	0.000381834	0.128928	0.0368004	0.0677346	3.41813	0.0350881
2019	K + PCO	Leaf_Number	C09_38388618	C09	38388618	0.293023	0.000468839	-2.01125	0.581706	0.0540839	3.32898	0.00496922
2019	K	First_LeafLength	C09_39394705	C09	39394705	0.273859	0.00072157	2.09065	0.623778	0.0455414	3.14172	0.0337999
2019	K + PCO	First_LeafLength	C09_39394705	C09	39394705	0.273859	0.000673652	2.12976	0.632386	0.0459726	3.17156	0.035076
2019	K	First_LeafLength	C09_39394706	C09	39394706	0.273859	0.00072157	2.09065	0.623778	0.0455414	3.14172	0.0536849
2019	K + PCO	First_LeafLength	C09_39394706	C09	39394706	0.273859	0.000673652	2.12976	0.632386	0.0459726	3.17156	0.0557118
2019	K	First_LeafLength	C09_39394742	C09	39394742	0.273859	0.00072157	2.09065	0.623778	0.0455414	3.14172	0.0539017
2019	K + PCO	First_LeafLength	C09_39394742	C09	39394742	0.273859	0.000673652	2.12976	0.632386	0.0459726	3.17156	0.0559368
2019	K	First_LeafLength	C09_39394752	C09	39394752	0.273859	0.00072157	2.09065	0.623778	0.0455414	3.14172	0.0346961
2019	K + PCO	First_LeafLength	C09_39394752	C09	39394752	0.273859	0.000673652	2.12976	0.632386	0.0459726	3.17156	0.0360061
2019	K	First_LeafLength	C09_39396674	C09	39396674	0.311203	0.000938799	1.80308	0.549567	0.0436827	3.02743	0.0404458

## Sheet: Suppl. S8
Supplementary Table S8 Hotspots in JWS v1 reference genome. LOD values under 3.0 are coloured in red
JWS v1 =	Cabbage reference genome JWS v1 (Liu et al., 2014)
Chr =	chromosome on which the SNP is located
Position =	position of the SNP on the chromosome
allFreq =	allele frequency of the SNP
effect =	effect of the SNP on the trait value
effectSE =	standard error of the effect of the SNP on the trait value
LOD =	LOD score for the SNP, defined as −log10(pValue)
RLR2 =	likelihood-ratio-based R2 as defined in Sun et al. (2010)
Hotspot in JWS v1	Year	Trait name	SNP name	Chr.	Position (bp)	allFreq	effect	effectSE	LOD		RLR2
									With PCO	Without PCO
1	2019	Head Area	C00_2759838	C00	2759838	0.09	35.32	10.97	2.94	3.18	0.05
	2019	Head Height	C00_2759838	C00	2759838	0.09	1.33	0.43	2.7	3.13	0.05
	2017	Head Area	C00_2759861	C00	2759861	0.18	27.44	8.02	3.26	2.72	0.04
	2017	Head Height	C00_2759861	C00	2759861	0.18	1.05	0.31	3.26	3.13	0.04
	2019	Head Area	C00_2759878	C00	2759878	0.09	37.41	11.43	3.02	3.35	0.05
	2019	Head Weight	C00_2759878	C00	2759878	0.09	0.36	0.1	3.43	3.47	0.06
2	2018	Leaf Area (RS)	C00_12694874	C00	12694874	0.31	-47.05	14.1	3.14	2.38	0.05
	2018	Leaf Area (RS)	C00_12694895	C00	12694895	0.31	-46.07	14.03	3.06	2.3	0.04
	2019	Head Area	C00_12695026	C00	12695026	0.28	-35.2	9.69	3.64	3.29	0.05
	2019	Head Height	C00_12695026	C00	12695026	0.28	-1.28	0.37	3.24	3.14	0.05
3	2018	Head Ratio	C00_19867852	C00	19867852	0.42	-0.05	0.01	3.05	3.18	0.07
	2019	Rosette Leaf Number	C00_19867852	C00	19867852	0.4	1.92	0.6	2.89	3.31	0.05
4	2019	Head Width	C00_61513162	C00	61513162	0.03	-3.16	0.92	3.29	3.03	0.05
	2019	Head Width	C00_61513199	C00	61513199	0.03	-3.16	0.92	3.29	3.03	0.05
	2017	Head Ratio	C00_61514821	C00	61514821	0.03	0.13	0.04	3.76	3.79	0.05
	2017	Head Ratio	C00_61514856	C00	61514856	0.03	0.13	0.04	3.76	3.79	0.05
5	2017	Head Area	C00_72506465	C00	72506465	0.23	26.96	7.84	3.29	2.29	0.03
	2017	Head Width	C00_72506465	C00	72506465	0.23	1.1	0.33	3.08	2.05	0.03
	2019	Head Width	C00_72506465	C00	72506465	0.2	1.6	0.49	3.04	2.71	0.04
	2017	Head Area	C00_72506496	C00	72506496	0.23	26.96	7.84	3.29	2.29	0.03
	2017	Head Width	C00_72506496	C00	72506496	0.23	1.1	0.33	3.08	2.05	0.03
	2019	Head Width	C00_72506496	C00	72506496	0.2	1.6	0.49	3.04	2.71	0.04
6	2019	Head Weight	C00_78639781	C00	78639781	0.03	-0.72	0.19	4.1	2.95	0.05
	2018	Leaf Length (RS)	C00_78639810	C00	78639810	0.31	1.21	0.37	3.03	3.11	0.06
	2018	Leaf Length (HS)	C00_78639810	C00	78639810	0.31	1.33	0.43	2.79	3.07	0.06
	2019	Leaf Length (RS)	C00_78639810	C00	78639810	0.3	1.67	0.5	3.17	3.32	0.05
7	2017	Leaf Ratio (HS)	C00_88234765	C00	88234765	0.04	0.15	0.05	2.43	3.93	0.05
	2018	Leaf Ratio (RS)	C00_88234765	C00	88234765	0.05	0.11	0.04	2.01	4.28	0.09
	2018	Leaf Ratio (HS)	C00_88234765	C00	88234765	0.05	0.09	0.05	1.32	3.12	0.06
8	2018	Leaf Area (RS)	C00_90024326	C00	90024326	0.24	46.54	13.5	3.33	3.54	0.07
	2018	Leaf Width (RS)	C00_90024326	C00	90024326	0.24	1.45	0.37	4.2	4.09	0.08
	2018	Head Area	C00_90024326	C00	90024326	0.26	63.02	18.05	3.42	4.03	0.09
	2018	Head Width	C00_90024326	C00	90024326	0.26	3	0.78	4.05	4.42	0.1
	2018	Head Height	C00_90024326	C00	90024326	0.26	2	0.58	3.31	4.15	0.09
	2018	Leaf Width (RS)	C00_90024373	C00	90024373	0.2	1.41	0.42	3.25	3.07	0.06
	2019	Leaf Ratio (HS)	C00_90026017	C00	90026017	0.17	-0.05	0.01	3.15	3.09	0.04
9	2018	Leaf Length (HS)	C00_92985598	C00	92985598	0.07	3.78	1.05	3.63	3.12	0.06
	2019	Head Height	C00_92985598	C00	92985598	0.05	2.43	0.66	3.69	3.73	0.06
10	2018	Leaf Ratio (RS)	C00_102232378	C00	102232378	0.25	0.07	0.02	3.66	3.95	0.08
	2018	Leaf Ratio (HS)	C00_102232378	C00	102232378	0.25	0.08	0.02	3.76	4.49	0.09
	2019	Leaf Ratio (RS)	C00_102232378	C00	102232378	0.22	0.06	0.02	3.01	3.8	0.06
11	2017	Head Ratio	C00_118245144	C00	118245144	0.02	0.11	0.04	2.4	3.06	0.04
	2018	Leaf Ratio (HS)	C00_118245144	C00	118245144	0.05	0.11	0.04	2.06	4.13	0.08
	2019	Leaf Ratio (RS)	C00_118245144	C00	118245144	0.02	0.24	0.05	6.16	5.74	0.09
	2019	Leaf Ratio (HS)	C00_118245144	C00	118245144	0.02	0.17	0.05	3.55	3.65	0.05
	2018	Leaf Ratio (HS)	C00_118245179	C00	118245179	0.05	0.09	0.04	1.59	3.33	0.07
	2019	Leaf Ratio (RS)	C00_118245179	C00	118245179	0.02	0.14	0.04	3.38	3.19	0.05
	2017	Head Ratio	C00_118245242	C00	118245242	0.02	0.11	0.04	2.4	3.06	0.04
	2018	Leaf Ratio (HS)	C00_118245242	C00	118245242	0.05	0.11	0.04	2.06	4.13	0.08
	2019	Leaf Ratio (RS)	C00_118245242	C00	118245242	0.02	0.19	0.05	4.39	4.23	0.06
	2019	Leaf Ratio (HS)	C00_118245242	C00	118245242	0.02	0.15	0.04	3.11	3.28	0.05
	2017	Head Ratio	C00_118245253	C00	118245253	0.02	0.11	0.04	2.4	3.06	0.04
	2018	Leaf Ratio (HS)	C00_118245253	C00	118245253	0.05	0.09	0.04	1.45	3.74	0.07
	2019	Leaf Ratio (RS)	C00_118245253	C00	118245253	0.02	0.19	0.05	4.39	4.23	0.06
	2019	Leaf Ratio (HS)	C00_118245253	C00	118245253	0.02	0.15	0.04	3.11	3.28	0.05
	2018	Leaf Ratio (HS)	C00_118245274	C00	118245274	0.06	0.09	0.04	1.52	3.76	0.08
	2019	Leaf Ratio (RS)	C00_118245274	C00	118245274	0.02	0.19	0.05	4.39	4.23	0.06
	2019	Leaf Ratio (HS)	C00_118245274	C00	118245274	0.02	0.15	0.04	3.11	3.28	0.05
	2019	Leaf Ratio (RS)	C00_118245341	C00	118245341	0.01	0.35	0.08	4.95	4.8	0.07
	2019	Leaf Ratio (HS)	C00_118245341	C00	118245341	0.01	0.29	0.08	3.75	4.09	0.06
12	2017	Head Ratio	C00_118344875	C00	118344875	0.02	0.15	0.05	3.13	4.02	0.06
	2019	Leaf Length (HS)	C00_118344875	C00	118344875	0.02	8.46	2.39	3.47	3.39	0.05
	2019	Leaf Ratio (RS)	C00_118344875	C00	118344875	0.01	0.29	0.06	6.39	5.52	0.08
	2019	Leaf Ratio (HS)	C00_118344875	C00	118344875	0.02	0.24	0.05	5.29	5.15	0.08
	2017	Head Ratio	C00_118344910	C00	118344910	0.02	0.15	0.05	3.13	4.02	0.06
	2019	Leaf Length (HS)	C00_118344910	C00	118344910	0.02	8.46	2.39	3.47	3.39	0.05
	2019	Leaf Ratio (RS)	C00_118344910	C00	118344910	0.01	0.29	0.06	6.39	5.52	0.08
	2019	Leaf Ratio (HS)	C00_118344910	C00	118344910	0.02	0.24	0.05	5.29	5.15	0.08
	2017	Head Ratio	C00_118344915	C00	118344915	0.02	0.15	0.05	3.13	4.02	0.06
	2019	Leaf Length (HS)	C00_118344915	C00	118344915	0.02	8.46	2.39	3.47	3.39	0.05
	2019	Leaf Ratio (RS)	C00_118344915	C00	118344915	0.01	0.29	0.06	6.39	5.52	0.08
	2019	Leaf Ratio (HS)	C00_118344915	C00	118344915	0.02	0.24	0.05	5.29	5.15	0.08
	2017	Head Ratio	C00_118344928	C00	118344928	0.02	0.15	0.04	4.27	4.64	0.07
	2019	Leaf Ratio (RS)	C00_118344928	C00	118344928	0.02	0.19	0.04	4.78	4.19	0.06
	2019	Leaf Ratio (HS)	C00_118344928	C00	118344928	0.02	0.16	0.04	3.71	3.44	0.05
	2017	Head Ratio	C00_118344941	C00	118344941	0.02	0.15	0.05	3.13	4.02	0.06
	2019	Leaf Length (HS)	C00_118344941	C00	118344941	0.02	8.46	2.39	3.47	3.39	0.05
	2019	Leaf Ratio (RS)	C00_118344941	C00	118344941	0.01	0.29	0.06	6.39	5.52	0.08
	2019	Leaf Ratio (HS)	C00_118344941	C00	118344941	0.02	0.24	0.05	5.29	5.15	0.08
13	2017	Head Ratio	C00_118364681	C00	118364681	0.02	0.11	0.04	2.4	3.06	0.04
	2018	Leaf Ratio (HS)	C00_118364681	C00	118364681	0.06	0.07	0.04	1.06	3.31	0.07
	2019	Leaf Ratio (RS)	C00_118364681	C00	118364681	0.02	0.23	0.05	6.27	5.64	0.09
	2019	Leaf Ratio (HS)	C00_118364681	C00	118364681	0.02	0.17	0.04	4.04	4.09	0.06
	2019	Leaf Ratio (RS)	C00_118364698	C00	118364698	0.01	0.35	0.08	4.95	4.8	0.07
	2019	Leaf Ratio (HS)	C00_118364698	C00	118364698	0.01	0.29	0.08	3.75	4.09	0.06
	2017	Head Ratio	C00_118364756	C00	118364756	0.02	0.11	0.04	2.4	3.06	0.04
	2018	Leaf Ratio (HS)	C00_118364756	C00	118364756	0.06	0.07	0.04	1.06	3.31	0.07
	2019	Leaf Ratio (RS)	C00_118364756	C00	118364756	0.02	0.18	0.04	4.56	4.26	0.06
	2019	Leaf Ratio (HS)	C00_118364756	C00	118364756	0.02	0.15	0.04	3.56	3.71	0.05
	2017	Head Ratio	C00_118364761	C00	118364761	0.02	0.11	0.04	2.4	3.06	0.04
	2018	Leaf Ratio (HS)	C00_118364761	C00	118364761	0.06	0.07	0.04	1.06	3.31	0.07
	2019	Leaf Ratio (RS)	C00_118364761	C00	118364761	0.02	0.18	0.04	4.56	4.26	0.06
	2019	Leaf Ratio (HS)	C00_118364761	C00	118364761	0.02	0.15	0.04	3.56	3.71	0.05
14	2017	Leaf Width (HS)	C00_118787741	C00	118787741	0.43	-1.47	0.49	2.62	3.27	0.04
	2019	Leaf Area (RS)	C00_118787741	C00	118787741	0.4	-49.57	16.02	2.74	3.06	0.04
	2019	Leaf Length (RS)	C00_118787741	C00	118787741	0.4	-1.53	0.48	2.91	3.58	0.05
15	2017	Leaf Length (HS)	C01_2508332	C01	2508332	0.28	1.75	0.64	2.23	3.06	0.04
	2019	Leaf Length (HS)	C01_2508377	C01	2508377	0.06	3.33	1.06	2.79	3.28	0.05
16	2017	Head Ratio	C01_11117294	C01	11117294	0.02	0.18	0.06	2.89	4.09	0.06
	2019	Head Ratio	C01_11117294	C01	11117294	0.02	0.17	0.06	2.63	3.17	0.05
	2017	Head Ratio	C01_11117353	C01	11117353	0.02	0.18	0.05	3.6	4.31	0.06
17	2018	Head Area	C01_15081460	C01	15081460	0.1	66.77	20.56	3	2.17	0.05
	2018	Head Area	C01_15081477	C01	15081477	0.1	66.77	20.56	3	2.17	0.05
	2017	Leaf Area (HS)	C01_15081505	C01	15081505	0.09	124.59	36.34	3.26	3.21	0.04
	2018	Head Area	C01_15081505	C01	15081505	0.1	66.77	20.56	3	2.17	0.05
18	2017	Head Ratio	C01_21898667	C01	21898667	0.02	0.14	0.04	3.4	3.47	0.05
	2018	Leaf Area (HS)	C01_21898667	C01	21898667	0.03	118.47	30.7	4.08	3.24	0.06
	2018	Leaf Length (HS)	C01_21898667	C01	21898667	0.03	4.86	1.17	4.67	4.2	0.08
	2019	Leaf Length (RS)	C01_21900299	C01	21900299	0.04	4.56	1.27	3.52	3.26	0.05
	2019	Leaf Area (HS)	C01_21900299	C01	21900299	0.05	156	46.13	3.19	2.57	0.04
	2019	Leaf Length (HS)	C01_21900299	C01	21900299	0.05	5.9	1.31	5.35	4.88	0.07
	2017	Leaf Area (HS)	C01_21900397	C01	21900397	0.28	113.04	33.38	3.19	2.34	0.03
	2017	Leaf Width (HS)	C01_21900397	C01	21900397	0.28	2.23	0.68	3.01	1.91	0.02
	2019	Leaf Length (RS)	C01_21900397	C01	21900397	0.27	2.39	0.71	3.14	3.08	0.04
	2019	Leaf Length (HS)	C01_21900397	C01	21900397	0.27	2.59	0.77	3.13	2.94	0.04
	2018	Leaf Length (HS)	C01_21953895	C01	21953895	0.03	3.61	1.08	3.15	2.85	0.06
	2019	Leaf Length (RS)	C01_21953895	C01	21953895	0.04	4.38	1.22	3.58	3.32	0.05
	2019	Leaf Length (HS)	C01_21953895	C01	21953895	0.05	5.32	1.32	4.37	3.98	0.06
	2019	Leaf Length (RS)	C01_22013677	C01	22013677	0.04	4.56	1.27	3.52	3.26	0.05
	2019	Leaf Area (HS)	C01_22013677	C01	22013677	0.05	156	46.13	3.19	2.57	0.04
	2019	Leaf Length (HS)	C01_22013677	C01	22013677	0.05	5.9	1.31	5.35	4.88	0.07
	2019	Leaf Length (RS)	C01_22013737	C01	22013737	0.04	4.56	1.27	3.52	3.26	0.05
	2019	Leaf Area (HS)	C01_22013737	C01	22013737	0.05	156	46.13	3.19	2.57	0.04
	2019	Leaf Length (HS)	C01_22013737	C01	22013737	0.05	5.9	1.31	5.35	4.88	0.07
	2019	Leaf Length (RS)	C01_22034779	C01	22034779	0.04	4.3	1.25	3.27	3.05	0.04
	2019	Leaf Area (HS)	C01_22034779	C01	22034779	0.04	156.06	45.26	3.3	2.74	0.04
	2019	Leaf Length (HS)	C01_22034779	C01	22034779	0.04	5.69	1.28	5.21	4.79	0.07
	2019	Leaf Length (RS)	C01_22034781	C01	22034781	0.04	4.63	1.33	3.39	3.12	0.05
	2019	Leaf Length (HS)	C01_22034781	C01	22034781	0.04	5.49	1.43	4	3.6	0.05
	2017	Head Height	C01_22090225	C01	22090225	0.03	1.96	0.58	3.21	3.09	0.04
	2017	Head Ratio	C01_22090225	C01	22090225	0.03	0.16	0.03	6.6	6.72	0.1
	2019	Leaf Length (RS)	C01_22090225	C01	22090225	0.05	4.9	1.13	5.03	4.59	0.07
	2019	Leaf Area (HS)	C01_22090225	C01	22090225	0.05	173.19	41.61	4.63	3.79	0.06
	2019	Leaf Length (HS)	C01_22090225	C01	22090225	0.05	5.71	1.17	6.28	5.74	0.09
	2019	Leaf Width (HS)	C01_22090225	C01	22090225	0.05	3	0.88	3.27	2.57	0.04
	2019	Head Ratio	C01_22090225	C01	22090225	0.04	0.16	0.04	4.25	4.38	0.07
	2017	Head Ratio	C01_22090269	C01	22090269	0.09	0.07	0.02	3.73	4.03	0.06
	2019	Leaf Length (HS)	C01_22090269	C01	22090269	0.11	2.98	0.8	3.75	4.16	0.06
	2017	Head Ratio	C01_22090293	C01	22090293	0.04	0.13	0.03	5.7	5.78	0.09
	2019	Leaf Length (RS)	C01_22090293	C01	22090293	0.05	3.7	1.06	3.39	3.13	0.05
	2019	Leaf Area (HS)	C01_22090293	C01	22090293	0.05	163.37	39.96	4.48	3.72	0.05
	2019	Leaf Length (HS)	C01_22090293	C01	22090293	0.05	5.09	1.1	5.65	5.25	0.08
	2019	Leaf Width (HS)	C01_22090293	C01	22090293	0.05	2.81	0.84	3.15	2.51	0.04
	2019	Head Ratio	C01_22090293	C01	22090293	0.04	0.14	0.04	4.27	4.41	0.07
	2017	Head Ratio	C01_22090298	C01	22090298	0.09	0.07	0.02	3.67	3.97	0.06
	2019	Leaf Length (HS)	C01_22090298	C01	22090298	0.11	2.95	0.79	3.82	4.24	0.06
19	2017	Head Ratio	C01_22353232	C01	22353232	0.04	0.12	0.03	3.7	3.91	0.06
	2018	Leaf Ratio (RS)	C01_22353232	C01	22353232	0.07	0.08	0.03	1.8	3.27	0.06
	2018	Leaf Ratio (HS)	C01_22353232	C01	22353232	0.07	0.08	0.04	1.47	3.18	0.06
	2019	Leaf Length (RS)	C01_22353232	C01	22353232	0.05	4.78	1.22	4.14	3.78	0.06
	2019	Leaf Length (HS)	C01_22353232	C01	22353232	0.05	5.72	1.27	5.39	4.89	0.07
	2019	Leaf Length (HS)	C01_22392742	C01	22392742	0.04	5.81	1.39	4.65	4.31	0.06
	2019	Leaf Length (HS)	C01_22392759	C01	22392759	0.05	4.81	1.21	4.26	3.9	0.06
20	2017	Head Ratio	C01_26433304	C01	26433304	0.01	0.23	0.05	4.84	5.38	0.08
	2019	Leaf Ratio (RS)	C01_26433304	C01	26433304	0.02	0.19	0.05	4.78	4.81	0.07
	2019	Head Ratio	C01_26433304	C01	26433304	0.01	0.24	0.07	3.47	3.81	0.06
	2019	Leaf Ratio (HS)	C01_26433304	C01	26433304	0.02	0.13	0.04	2.89	3.13	0.04
21	2019	Head Weight	C02_1410548	C02	1410548	0.39	-0.25	0.07	3.36	3.65	0.06
	2018	Leaf Width (RS)	C02_1410575	C02	1410575	0.43	-0.84	0.31	2.25	3.1	0.06
	2018	Leaf Width (HS)	C02_1410575	C02	1410575	0.43	-0.83	0.34	1.87	3.27	0.06
	2018	Leaf Ratio (RS)	C02_1419010	C02	1419010	0.08	0.08	0.03	2.21	3.38	0.07
	2018	Leaf Ratio (HS)	C02_1419010	C02	1419010	0.08	0.09	0.03	2.32	3.94	0.08
22	2018	Leaf Ratio (RS)	C02_24035327	C02	24035327	0.06	0.09	0.03	2.46	3.87	0.08
	2018	Leaf Ratio (HS)	C02_24035327	C02	24035327	0.06	0.1	0.03	2.25	3.74	0.07
	2017	Head Area	C02_24035391	C02	24035391	0.11	-32.89	9.89	3.1	4.01	0.06
	2017	Head Width	C02_24035391	C02	24035391	0.11	-1.23	0.42	2.49	3.35	0.05
23	2017	Head Width	C02_25031037	C02	25031037	0.04	-1.78	0.62	2.37	3.29	0.05
	2018	Head Ratio	C02_25031037	C02	25031037	0.05	0.13	0.04	3.39	2.64	0.06
24	2017	Head Height	C02_41884716	C02	41884716	0.35	0.91	0.26	3.34	4.37	0.06
	2017	Head Area	C02_41884716	C02	41884716	0.35	21.44	6.82	2.81	3.03	0.04
	2019	Head Width	C02_41884716	C02	41884716	0.35	1.16	0.35	3.13	2.25	0.03
25	2017	Leaf Area (HS)	C03_1763045	C03	1763045	0.2	117.58	30.07	4.12	3.79	0.05
	2017	Leaf Width (HS)	C03_1763045	C03	1763045	0.2	2.27	0.62	3.69	3.49	0.04
	2017	Head Area	C03_1763045	C03	1763045	0.21	29.98	7.5	4.3	3.6	0.05
	2017	Head Height	C03_1763045	C03	1763045	0.21	1.21	0.29	4.75	3.58	0.05
	2019	Leaf Width (RS)	C03_1763045	C03	1763045	0.21	1.6	0.48	3.08	2.76	0.04
26	2018	Leaf Length (RS)	C03_3671710	C03	3671710	0.06	-3.5	0.81	4.99	5.06	0.1
	2018	Leaf Length (HS)	C03_3671710	C03	3671710	0.06	-3.41	0.94	3.68	3.91	0.08
	2018	Leaf Length (RS)	C03_3671751	C03	3671751	0.06	-2.99	0.8	3.85	3.96	0.08
	2018	Leaf Length (HS)	C03_3671751	C03	3671751	0.06	-3.19	0.92	3.36	3.59	0.07
	2017	Leaf Length (HS)	C03_3671771	C03	3671771	0.04	-4.13	1.33	2.76	3.2	0.04
	2018	Leaf Length (RS)	C03_3671771	C03	3671771	0.05	-3.63	0.87	4.69	5.17	0.1
	2018	Leaf Length (HS)	C03_3671771	C03	3671771	0.05	-3.6	1	3.59	4.25	0.09
27	2018	Leaf Ratio (RS)	C03_5631145	C03	5631145	0.16	0.07	0.02	3.01	3.22	0.06
	2019	Leaf Ratio (RS)	C03_5631157	C03	5631157	0.04	0.11	0.03	4.19	4.26	0.06
	2019	Leaf Ratio (RS)	C03_5631223	C03	5631223	0.05	0.1	0.03	3.48	3.59	0.05
	2017	Head Area	C03_5648602	C03	5648602	0.07	-36.14	10.5	3.29	2.7	0.04
	2017	Head Area	C03_5648655	C03	5648655	0.07	-36.14	10.5	3.29	2.7	0.04
	2017	Head Area	C03_5718034	C03	5718034	0.02	70.81	23.28	2.66	3.74	0.05
28	2018	Head Width	C03_6253596	C03	6253596	0.21	-2.43	0.86	2.36	3.13	0.07
	2019	Rosette Leaf Number	C03_6253596	C03	6253596	0.24	-2.51	0.75	3.14	2.88	0.05
29	2017	Leaf Area (HS)	C03_11403850	C03	11403850	0.15	-126.21	34.9	3.58	3.47	0.04
	2017	Leaf Width (HS)	C03_11403850	C03	11403850	0.15	-2.39	0.71	3.13	2.9	0.03
	2018	Leaf Area (RS)	C03_11403850	C03	11403850	0.18	-42.36	14.09	2.62	3.19	0.06
30	2017	Leaf Length (HS)	C03_16905567	C03	16905567	0.07	-4.4	1.34	3.01	3.61	0.04
	2018	Leaf Length (HS)	C03_16905567	C03	16905567	0.07	-2.99	1.02	2.51	3.44	0.07
	2017	Leaf Length (HS)	C03_16905592	C03	16905592	0.07	-5.03	1.38	3.62	4.2	0.05
	2018	Leaf Length (HS)	C03_16905592	C03	16905592	0.07	-3.25	1.05	2.76	3.77	0.08
	2017	Leaf Length (HS)	C03_16905609	C03	16905609	0.07	-4.59	1.32	3.33	3.89	0.05
	2018	Leaf Length (HS)	C03_16905609	C03	16905609	0.07	-3.28	1	3.08	4.01	0.08
	2018	Leaf Area (HS)	C03_16946055	C03	16946055	0.1	-90.96	30.95	2.52	3.58	0.07
	2018	Leaf Length (HS)	C03_16946055	C03	16946055	0.1	-3.18	1.19	2.15	3.18	0.06
	2017	Leaf Length (HS)	C03_16946057	C03	16946057	0.12	-4.05	1.31	2.72	3.24	0.04
	2018	Leaf Area (HS)	C03_16946057	C03	16946057	0.13	-88.95	25	3.52	4.72	0.1
	2018	Leaf Length (HS)	C03_16946057	C03	16946057	0.13	-3.03	0.95	2.88	3.67	0.07
	2018	Leaf Width (HS)	C03_16946057	C03	16946057	0.13	-1.78	0.64	2.31	3.36	0.07
	2017	Leaf Length (HS)	C03_16946060	C03	16946060	0.12	-4.05	1.31	2.72	3.24	0.04
	2018	Leaf Area (HS)	C03_16946060	C03	16946060	0.13	-88.95	25	3.52	4.72	0.1
	2018	Leaf Length (HS)	C03_16946060	C03	16946060	0.13	-3.03	0.95	2.88	3.67	0.07
	2018	Leaf Width (HS)	C03_16946060	C03	16946060	0.13	-1.78	0.64	2.31	3.36	0.07
31	2017	Head Ratio	C03_19710594	C03	19710594	0.04	0.09	0.03	3.03	3.39	0.05
	2018	Head Width	C03_19710594	C03	19710594	0.04	-5.47	1.53	3.58	3.25	0.07
	2017	Head Ratio	C03_19710598	C03	19710598	0.04	0.09	0.03	3.03	3.39	0.05
	2018	Head Width	C03_19710598	C03	19710598	0.04	-5.47	1.53	3.58	3.25	0.07
32	2018	Head Height	C04_1142359	C04	1142359	0.14	1.81	0.61	2.56	3.22	0.07
	2019	Leaf Area (RS)	C04_1142368	C04	1142368	0.34	51.72	15.7	3.05	2.94	0.04
	2018	Head Height	C04_1142407	C04	1142407	0.16	1.63	0.55	2.6	3.2	0.07
	2018	Head Height	C04_1142419	C04	1142419	0.13	2	0.63	2.9	3.4	0.07
	2018	Head Width	C04_1142541	C04	1142541	0.06	3.67	1.25	2.54	3.33	0.07
	2018	Head Width	C04_1142548	C04	1142548	0.05	3.52	1.27	2.29	3.09	0.07
33	2017	Head Ratio	C04_1478243	C04	1478243	0.28	0.03	0.01	2.28	3.24	0.05
	2019	Rosette Leaf Number	C04_1478306	C04	1478306	0.03	5.62	1.77	2.87	3.55	0.06
	2018	Head Ratio	C04_1507914	C04	1507914	0.06	-0.11	0.03	3.19	3.02	0.07
	2017	Leaf Length (HS)	C04_1507929	C04	1507929	0.04	5.34	1.45	3.69	3.66	0.05
	2019	Head Ratio	C04_1507929	C04	1507929	0.01	0.22	0.06	3.21	2.67	0.04
	2018	Head Ratio	C04_1507986	C04	1507986	0.06	-0.11	0.03	3.19	3.02	0.07
	2018	Leaf Length (RS)	C04_1513800	C04	1513800	0.08	2.75	0.76	3.63	2.73	0.05
	2018	Leaf Length (HS)	C04_1513800	C04	1513800	0.08	3.7	0.88	4.83	3.78	0.08
34	2018	Leaf Width (HS)	C04_14057715	C04	14057715	0.32	-1.16	0.34	3.29	2.31	0.04
	2017	Head Ratio	C04_14057771	C04	14057771	0.33	0.04	0.01	2.44	3.06	0.04
	2018	Leaf Width (HS)	C04_14057771	C04	14057771	0.34	-1.07	0.33	3.02	2.14	0.04
	2018	Leaf Width (HS)	C04_14057773	C04	14057773	0.33	-1.11	0.33	3.12	2.21	0.04
35	2018	Head Ratio	C04_40577243	C04	40577243	0.36	0.05	0.02	2.23	3.76	0.05
	2019	Leaf Ratio (RS)	C04_40577243	C04	40577243	0.4	0.05	0.02	3.14	2.7	0.04
	2019	Head Ratio	C04_40577243	C04	40577243	0.4	0.08	0.02	3.98	5.69	0.1
36	2018	Leaf Length (HS)	C05_26072187	C05	26072187	0.05	-2.75	1.01	2.22	3.02	0.06
	2019	Leaf Area (HS)	C05_26077312	C05	26077312	0.12	-98.3	37.36	2.08	3.2	0.05
	2019	Leaf Width (HS)	C05_26077312	C05	26077312	0.12	-2.35	0.78	2.64	3.84	0.06
	2019	Leaf Area (HS)	C05_26114270	C05	26114270	0.09	-156.97	42.89	3.67	4.97	0.07
	2019	Leaf Width (HS)	C05_26114270	C05	26114270	0.09	-3.55	0.89	4.28	5.62	0.08
	2019	Leaf Area (RS)	C05_26114270	C05	26114270	0.1	-113.41	35.33	2.92	3.6	0.05
	2019	Leaf Width (RS)	C05_26114270	C05	26114270	0.1	-2.63	0.82	2.91	3.83	0.06
	2019	Leaf Width (HS)	C05_26119579	C05	26119579	0.12	-1.94	0.68	2.38	3.31	0.05
	2019	Leaf Area (HS)	C05_26119615	C05	26119615	0.12	-89	33.27	2.14	3.13	0.04
	2019	Leaf Width (HS)	C05_26119615	C05	26119615	0.12	-2.05	0.69	2.54	3.55	0.05
37	2019	Leaf Width (HS)	C05_32097594	C05	32097594	0.14	2.06	0.57	3.6	3.45	0.05
	2019	Leaf Ratio (HS)	C05_32097594	C05	32097594	0.14	-0.06	0.02	3.46	2.26	0.03
	2018	Leaf Ratio (RS)	C05_32097629	C05	32097629	0.03	0.13	0.05	1.77	3.54	0.07
	2019	Leaf Width (HS)	C05_32097678	C05	32097678	0.14	2.06	0.57	3.64	3.47	0.05
	2019	Leaf Ratio (HS)	C05_32097678	C05	32097678	0.14	-0.06	0.02	3.52	2.28	0.03
	2018	Leaf Ratio (RS)	C05_32099200	C05	32099200	0.03	0.12	0.05	1.62	3.37	0.07
	2018	Leaf Ratio (RS)	C05_32099305	C05	32099305	0.03	0.12	0.05	1.62	3.37	0.07
38	2019	Leaf Area (HS)	C05_32352509	C05	32352509	0.26	74.25	22.1	3.16	2.38	0.03
	2019	Leaf Width (HS)	C05_32352509	C05	32352509	0.26	1.55	0.46	3.17	2.34	0.03
	2018	Leaf Ratio (RS)	C05_32356189	C05	32356189	0.1	0.08	0.03	2.37	3.48	0.07
39	2018	Head Area	C06_17566702	C06	17566702	0.35	48.1	14.68	3.05	2.21	0.05
	2018	Head Height	C06_17566702	C06	17566702	0.35	1.91	0.48	4.38	3.43	0.08
	2019	Head Ratio	C06_17566702	C06	17566702	0.38	0.07	0.02	3.9	2.91	0.05
40	2017	Leaf Area (HS)	C06_20162376	C06	20162376	0.18	105.91	32.34	3.01	2.57	0.03
	2019	Head Ratio	C06_20162376	C06	20162376	0.13	0.08	0.02	3.47	3.21	0.05
41	2017	Leaf Length (HS)	C06_38869323	C06	38869323	0.06	-4.75	1.42	3.11	3.97	0.05
	2019	Leaf Length (RS)	C06_38869323	C06	38869323	0.04	-4.7	1.33	3.45	3.81	0.06
	2019	Leaf Length (HS)	C06_38869323	C06	38869323	0.04	-5.11	1.45	3.43	3.84	0.06
42	2017	Head Height	C07_20433109	C07	20433109	0.03	-1.78	0.52	3.28	1.96	0.03
	2019	Head Ratio	C07_20433109	C07	20433109	0.03	-0.11	0.03	3.54	3.16	0.05
43	2019	Leaf Ratio (HS)	C07_29490445	C07	29490445	0.1	0.06	0.02	2.54	3.4	0.05
	2017	Head Ratio	C07_29512164	C07	29512164	0.01	0.22	0.05	5.04	5.39	0.08
	2019	Leaf Length (RS)	C07_29512164	C07	29512164	0.01	7.17	1.92	3.81	3.41	0.05
	2019	Leaf Length (HS)	C07_29512164	C07	29512164	0.01	7.56	2.09	3.6	3.31	0.05
	2019	Leaf Ratio (RS)	C07_29512164	C07	29512164	0.01	0.19	0.05	4.1	3.91	0.06
44	2018	Head Ratio	C07_32826347	C07	32826347	0.44	0.06	0.01	4.17	4.13	0.09
	2019	Head Ratio	C07_32826347	C07	32826347	0.47	0.05	0.01	3.03	3.18	0.05
45	2017	Leaf Area (HS)	C07_35608927	C07	35608927	0.09	137.54	43.18	2.87	4.09	0.05
	2017	Leaf Length (HS)	C07_35608927	C07	35608927	0.09	2.93	1.1	2.13	3.25	0.04
	2017	Leaf Width (HS)	C07_35608927	C07	35608927	0.09	2.72	0.88	2.71	3.71	0.05
	2019	Head Height	C07_35608927	C07	35608927	0.07	-1.92	0.55	3.41	3.51	0.06
46	2017	Leaf Ratio (HS)	C08_26700009	C08	26700009	0.07	-0.15	0.04	3.56	3.12	0.04
	2017	Leaf Ratio (HS)	C08_26700041	C08	26700041	0.07	-0.15	0.04	3.56	3.12	0.04
	2017	Leaf Ratio (HS)	C08_26700105	C08	26700105	0.09	-0.14	0.04	3.43	3.03	0.04
	2018	Leaf Ratio (RS)	C08_26721040	C08	26721040	0.05	-0.08	0.03	3.07	2.43	0.05
47	2017	Head Ratio	C09_625237	C09	625237	0.04	0.09	0.03	2.19	3.13	0.04
	2019	Head Height	C09_625237	C09	625237	0.04	2.25	0.69	2.98	3.04	0.05
	2019	Head Ratio	C09_625237	C09	625237	0.04	0.13	0.05	2.53	3	0.05
	2018	Leaf Ratio (HS)	C09_625320	C09	625320	0.22	0.08	0.02	3.25	3.61	0.07
48	2019	Leaf Ratio (RS)	C09_1192434	C09	1192434	0.29	0.04	0.01	3.12	2.71	0.04
	2019	Leaf Ratio (RS)	C09_1192437	C09	1192437	0.29	0.04	0.01	3.12	2.71	0.04
	2018	Leaf Ratio (HS)	C09_1192549	C09	1192549	0.12	-0.08	0.02	3.63	2.96	0.06
	2019	Leaf Ratio (RS)	C09_1192549	C09	1192549	0.15	-0.06	0.02	3.12	2.52	0.04
	2018	Leaf Ratio (HS)	C09_1192591	C09	1192591	0.12	-0.08	0.02	3.63	2.96	0.06
	2019	Leaf Ratio (RS)	C09_1192591	C09	1192591	0.15	-0.06	0.02	3.12	2.09	0.03
49	2017	Leaf Length (HS)	C09_9061145	C09	9061145	0.03	-6.49	1.96	3.08	3.37	0.04
	2017	Leaf Area (HS)	C09_9061145	C09	9061145	0.03	-206.01	76.9	2.15	3.18	0.04
	2017	Leaf Width (HS)	C09_9061145	C09	9061145	0.03	-3.86	1.57	1.86	3.24	0.04
	2018	Leaf Length (RS)	C09_9064926	C09	9064926	0.09	-1.87	0.57	3.03	2.89	0.06
50	2018	Leaf Ratio (RS)	C09_21907364	C09	21907364	0.12	0.07	0.03	2	3.57	0.07
	2019	Head Ratio	C09_21907377	C09	21907377	0.03	0.23	0.07	3.41	3.46	0.06
	2018	Leaf Ratio (HS)	C09_21978318	C09	21978318	0.04	0.1	0.04	1.87	3.15	0.06
51	2018	Leaf Width (HS)	C09_22142775	C09	22142775	0.06	-2.04	0.78	2.07	3.91	0.08
	2018	Leaf Ratio (RS)	C09_22142775	C09	22142775	0.06	0.09	0.04	1.7	3.85	0.08
	2018	Leaf Ratio (HS)	C09_22142775	C09	22142775	0.06	0.09	0.04	1.62	4.04	0.08
	2017	Leaf Ratio (HS)	C09_22144045	C09	22144045	0.03	0.18	0.06	2.97	3.96	0.05
	2018	Leaf Length (HS)	C09_22144045	C09	22144045	0.04	4.84	1.31	3.78	3.18	0.06
	2018	Leaf Ratio (HS)	C09_22144045	C09	22144045	0.04	0.13	0.05	1.92	4.04	0.08
52	2018	Leaf Area (RS)	C09_27621549	C09	27621549	0.04	130.51	37.21	3.43	4.14	0.08
	2018	Leaf Width (RS)	C09_27621549	C09	27621549	0.04	3.21	1	2.92	3.68	0.07
	2018	Leaf Area (HS)	C09_27621549	C09	27621549	0.04	122.62	43.23	2.37	3.06	0.06
	2018	Head Area	C09_27621549	C09	27621549	0.04	134.96	55.43	1.84	3.52	0.08
	2018	Head Height	C09_27621549	C09	27621549	0.04	4.76	1.8	2.1	4.03	0.09
	2019	Leaf Width (RS)	C09_27621549	C09	27621549	0.04	4.05	1.22	3.08	2.78	0.04

## Sheet: Suppl. S9
Supplementary Table S9 Hotspots genomic positions at JZS v1 and their syntenic position at JZS v2
JZS v2 (Cai et al., 2020)				JZS v1 (Liu et al., 2014)
Hotspot	Chr.	Start	End	Hotspot	Chr.	Start	End
1	C01	2741518	2741563	15	C01	2508332	2508377
2	C01	13211733	13211792	16	C01	11117294	11117353
3	C01	19264323	19266017	4	C00	61514856	61513162
4	C01	25988928	25989021	17	C01	15081505	15081460
5	C01	32594173	32792982	18	C01	21898667	22090298
6	C01	33078063	33117755	19	C01	22353232	22392759
7	C01	36327843		20	C01	26433304
8	C01	45924750	45926441	8	C00	90026017	90024326
9	C02	1168872	1177317	21	C02	1410548	1419010
10	C02	6398745		7	C00	88234765
11	C02	34302652	34302849	11	C00	118245144	118245341
11	C02	34405672	34405748	12	C00	118344875	118344941
11	C02	34425755	34425835	13	C00	118364681	118364761
12	C02	35457838	35457902	22	C02	24035391	24035327
13	C02	44885796		23	C02	25031037
14	C02	62999526		29	C03	11403850
15	C02	65395714		24	C02	41884716
16	C03	2117433		25	C03	1763045
17	C03	4963824	4963885	26	C03	3671710	3671771
18	C03	6966612	7073152	27	C03	5631145	5718034
19	C03	7859434		28	C03	6253596
20	C03	23949911	23949915	31	C03	19710594	19710598
21	C03	29023441	29064188	30	C03	16905567	16946060
22	C03	42199525		39	C06	17566702
23	C04	3303398	3303587	32	C04	1142359	1142548
24	C04	3901245	3937032	33	C04	1478243	1513800
25	C04	64812512		35	C04	40577243
26	C05	3814711	3862174	36	C05	26119615	26072187
27	C05	22702809		10	C00	102232378
28	C05	30228767		42	C07	20433109
29	C05	46568556	46568614	34	C04	14057715	14057773
30	C05	49244426		3	C00	19867852
31	C05	53595781	53597492	37	C05	32097594	32099305
32	C05	53851550	53855230	38	C05	32352509	32356189
33	C06	2367744		41	C06	38869323
34	C06	10533562		40	C06	20162376
35	C07	35821045	35842819	43	C07	29490445	29512164
36	C07	39740552		44	C07	32826347
37	C07	42296997		14	C00	118787741
38	C07	43817903		45	C07	35608927
39	C08	553562	553605	1	C00	2759878	2759838
40	C08	5472778	5472809	5	C00	72506465	72506496
41	C08	35455131	35480886	46	C08	26700009	26721040
42	C08	38857661		9	C00	92985598
43	C09	785875	785958	47	C09	625237	625320
44	C09	1412375	1412532	48	C09	1192434	1192591
45	C09	13953991	13954020	6	C00	78639781	78639810
46	C09	23947130	23950911	49	C09	9061145	9064926
47	C09	36569373	36569525	2	C00	12695026	12694874
48	C09	45485040	45556401	50	C09	21907364	21978318
49	C09	45719394	45720664	51	C09	22142775	22144045
50	C09	53435645		52	C09	27621549

## Sheet: Suppl. S10
Supplementary Table S10 Expanded hotspot regions in the JZS v2 genome (Cai et al., 2020) for candidate gene mining
Hotspots with JZS v2	Chr.	Border SNPs of Hotspots (bp)		Border SNPs of Hotspots ± 50,000 bp
		Left	Right	Left	Right
1	C01	2741518	2741563	2691518	2791563
2	C01	13211733	13211792	13161733	13261792
3	C01	19266017	19264323	19316017	19214323
4	C01	25989021	25988928	26039021	25938928
5	C01	32594173	32792982	32544173	32842982
6	C01	33078063	33117755	33028063	33167755
7	C01	36327843	36327844	36277843	36377844
8	C01	45926441	45924750	45976441	45874750
9	C02	1168872	1177317	1118872	1227317
10	C02	6398745	6398746	6348745	6448746
11	C02	34302652	34425835	34252652	34475835
12	C02	35457902	35457838	35507902	35407838
13	C02	44885796	44885797	44835796	44935797
14	C02	62999526	62999527	62949526	63049527
15	C02	65395714	65395715	65345714	65445715
16	C03	2117433	2117434	2067433	2167434
17	C03	4963824	4963885	4913824	5013885
18	C03	6966612	7073152	6916612	7123152
19	C03	7859434	7859435	7809434	7909435
20	C03	23949911	23949915	23899911	23999915
21	C03	29023441	29064188	28973441	29114188
22	C03	42199525	42199526	42149525	42249525
23	C04	3303398	3303587	3253398	3353587
24	C04	3901245	3937032	3851245	3987032
25	C04	64812512	64812513	64762512	64862513
26	C05	3814711	3862174	3764711	3912174
27	C05	22702809	22702810	22652809	22752810
28	C05	30228767	30228768	30178767	30278768
29	C05	46568556	46568614	46518556	46618614
30	C05	49244426	49244427	49194426	49294427
31	C05	53595781	53597492	53545781	53647492
32	C05	53851550	53855230	53801550	53905230
33	C06	2367744	2367745	2317744	2417745
34	C06	10533562	10533563	10483562	10583563
35	C07	35821045	35842819	35771045	35892819
36	C07	39740552	39740553	39690552	39790553
37	C07	42296997	42297097	42246997	42347097
38	C07	43817903	43817904	43767903	43867904
39	C08	553605	553562	603605	503562
40	C08	5472778	5472809	5422778	5522809
41	C08	35455131	35480886	35405131	35530886
42	C08	38857661	38857662	38807661	38907662
43	C09	785875	785958	735875	835958
44	C09	1412375	1412532	1362375	1462532
45	C09	13953991	13954020	13903991	14004020
46	C09	23947130	23950911	23897130	24000911
47	C09	36569525	36569373	36619525	36519373
48	C09	45485040	45556401	45435040	45606401
49	C09	45719394	45720664	45669394	45770664
50	C09	53435645	53435646	53385645	53485646

[truncated: 2 more sheets: Suppl. S11, Suppl. S12]
